# Supplementary material for: Moderate to severe OSA screening based on support vector machine of the Chinese population faciocervical measurements dataset: a cross-sectional study
Source: PubMed Central journal article supplement — BMJ Open. 2021 Sep 17;11(9):e048482. doi: 10.1136/bmjopen-2020-048482 (PMC8451311; doi:10.1136/bmjopen-2020-048482), 2021-09-17

# BMJ Open

BMJ Open is committed to open peer review. As part of this commitment we make the peer review history of every article we publish publicly available.

When an article is published we post the peer reviewers' comments and the authors' responses online. We also post the versions of the paper that were used during peer review. These are the versions that the peer review comments apply to.

The versions of the paper that follow are the versions that were submitted during the peer review process. They are not the versions of record or the final published versions. They should not be cited or distributed as the published version of this manuscript.

BMJ Open is an open access journal and the full, final, typeset and author-corrected version of record of the manuscript is available on our site with no access controls, subscription charges or pay-per-view fees (<http://bmjopen.bmj.com>).

If you have any questions on BMJ Open's open peer review process please email [info.bmjopen@bmj.com](mailto:info.bmjopen@bmj.com)

# BMJ Open

## Facio-cervical Measurements Based Machine Learning Model Predicts Obstructive Sleep Apnea in Chinese Population

|                               |                                                                                                                                                                                                                                                                                                                                                                                                                                                                                                                                                                                                                                                                                                                                                                                                                                                                                                                                                                                                            |
|-------------------------------|------------------------------------------------------------------------------------------------------------------------------------------------------------------------------------------------------------------------------------------------------------------------------------------------------------------------------------------------------------------------------------------------------------------------------------------------------------------------------------------------------------------------------------------------------------------------------------------------------------------------------------------------------------------------------------------------------------------------------------------------------------------------------------------------------------------------------------------------------------------------------------------------------------------------------------------------------------------------------------------------------------|
| Journal:                      | <i>BMJ Open</i>                                                                                                                                                                                                                                                                                                                                                                                                                                                                                                                                                                                                                                                                                                                                                                                                                                                                                                                                                                                            |
| Manuscript ID                 | bmjopen-2020-048482                                                                                                                                                                                                                                                                                                                                                                                                                                                                                                                                                                                                                                                                                                                                                                                                                                                                                                                                                                                        |
| Article Type:                 | Original research                                                                                                                                                                                                                                                                                                                                                                                                                                                                                                                                                                                                                                                                                                                                                                                                                                                                                                                                                                                          |
| Date Submitted by the Author: | 30-Dec-2020                                                                                                                                                                                                                                                                                                                                                                                                                                                                                                                                                                                                                                                                                                                                                                                                                                                                                                                                                                                                |
| Complete List of Authors:     | <p>zhang, liu; Shanghai Jiao Tong University Medical School Affiliated Ruijin Hospital</p> <p>Yan, Ya Ru; Shanghai Jiao Tong University Medical School Affiliated Ruijin Hospital</p> <p>Li, Shi Qi; Shanghai Jiao Tong University Medical School Affiliated Ruijin Hospital</p> <p>Li, Hong Peng; Shanghai Jiao Tong University Medical School Affiliated Ruijin Hospital</p> <p>Lin, Ying Ni; Shanghai Jiao Tong University Medical School Affiliated Ruijin Hospital</p> <p>Li, Ning; Shanghai Jiao Tong University Medical School Affiliated Ruijin Hospital</p> <p>Sun, Xian Wen; Shanghai Jiao Tong University Medical School Affiliated Ruijin Hospital</p> <p>Ding, Yong Jie; Shanghai Jiao Tong University Medical School Affiliated Ruijin Hospital Library</p> <p>Li, Chuan Xiang; Shanghai Jiao Tong University Medical School Affiliated Ruijin Hospital</p> <p>Li, Qing Yun; Shanghai Jiao Tong University Medical School Affiliated Ruijin Hospital, Department of Respiratory Medicine</p> |
| Keywords:                     | PUBLIC HEALTH, SLEEP MEDICINE, Adult anaesthesia < ANAESTHETICS                                                                                                                                                                                                                                                                                                                                                                                                                                                                                                                                                                                                                                                                                                                                                                                                                                                                                                                                            |
|                               |                                                                                                                                                                                                                                                                                                                                                                                                                                                                                                                                                                                                                                                                                                                                                                                                                                                                                                                                                                                                            |

SCHOLARONE™  
Manuscripts

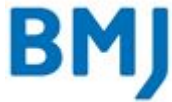

I, the Submitting Author has the right to grant and does grant on behalf of all authors of the Work (as defined in the below author licence), an exclusive licence and/or a non-exclusive licence for contributions from authors who are: i) UK Crown employees; ii) where BMJ has agreed a CC-BY licence shall apply, and/or iii) in accordance with the terms applicable for US Federal Government officers or employees acting as part of their official duties; on a worldwide, perpetual, irrevocable, royalty-free basis to BMJ Publishing Group Ltd ("BMJ") its licensees and where the relevant Journal is co-owned by BMJ to the co-owners of the Journal, to publish the Work in this journal and any other BMJ products and to exploit all rights, as set out in our [licence](#).

The Submitting Author accepts and understands that any supply made under these terms is made by BMJ to the Submitting Author unless you are acting as an employee on behalf of your employer or a postgraduate student of an affiliated institution which is paying any applicable article publishing charge ("APC") for Open Access articles. Where the Submitting Author wishes to make the Work available on an Open Access basis (and intends to pay the relevant APC), the terms of reuse of such Open Access shall be governed by a Creative Commons licence – details of these licences and which [Creative Commons](#) licence will apply to this Work are set out in our licence referred to above.

Other than as permitted in any relevant BMJ Author's Self Archiving Policies, I confirm this Work has not been accepted for publication elsewhere, is not being considered for publication elsewhere and does not duplicate material already published. I confirm all authors consent to publication of this Work and authorise the granting of this licence.

## Facio-cervical Measurements Based Machine Learning Model Predicts Obstructive Sleep

### Apnea in Chinese Population

Liu Zhang\*<sup>1,2</sup>, Ya Ru Yan\*<sup>1,2</sup>, Shi Qi Li \*<sup>1,2</sup>, Hong Peng Li <sup>1,2</sup>, Ying Ni Lin <sup>1,2</sup>, Ning Li <sup>1,2</sup>, Xian Wen Sun <sup>1,2</sup>, Yong Jie Ding<sup>1,2</sup>, Chuan Xiang Li<sup>1,2</sup>, Qing Yun Li<sup>1,2</sup>

<sup>1</sup>Department of Respiratory and Critical Care Medicine, Ruijin Hospital, Shanghai Jiao Tong

University School of Medicine, Shanghai 200025, China

<sup>2</sup>Institute of Respiratory Medicine, Shanghai Jiao Tong University School of Medicine, Shanghai

200025, China

\* co-first authors

#### Corresponding author full contact details:

Name: Qing Yun Li, M.D, Ph.D.

Address: Department of Respiratory and Critical Care Medicine, Ruijin Hospital, Shanghai Jiao Tong

University School of Medicine

Post code: 200025

City: Shanghai

Country: China

Email: [liqingyun68@hotmail.com](mailto:liqingyun68@hotmail.com)

All authors have seen and approved the manuscript

Financial support: This work was supported by grants from National Key R&D Program of China (2018YFC1311900) and the National Natural Science Foundation of China (founding no. 81770084, 81700084, 81570082).

No conflicts of interest are to be reported.

**ABSTRACT:**

**Objectives** Obstructive sleep apnea (OSA) has received much attention as a risk factor for perioperative complications and 68.5% OSA patients remain undiagnosed before surgery. Facio-cervical characteristics may predict OSA for Asians due to smaller upper airways compared to Caucasians. Thus, our study aimed to explore a machine-learning model to screen for moderate-severe OSA based on facio-cervical and anthropometric measurements.

**Design** A cross-sectional study.

**Setting** Data were collected from Shanghai Jiao Tong University School of Medicine affiliated Ruijin Hospital between February 2019 and August 2020.

**Participants** A total of 481 Chinese participants were included in the study.

**Primary and secondary outcome** (1) Identification moderate-severe OSA with apnea-hypopnoea index (AHI)  $\geq 15$  events  $\cdot$  h<sup>-1</sup>. (2) Verification the machine learning model.

**Results** The SABIHC2 model (*Sex-Age-Body mass index-maximum Interincisal distance-ratio of Height to thyro-sternum distance-neck Circumference-waist Circumference*) was set up. The SABIHC2 model could predict moderate-severe OSA with area under the curve (AUC)=0.787, sensitivity of 87.4% and specificity of 70.0%, and performed better than the STOP-BANG questionnaire, which showed AUC=0.597, sensitivity of 49.5% and specificity of 78.0%. Especially for asymptomatic patients (ESS < 10), the SABIHC2 model demonstrated better predictive ability compared to the STOP-BANG questionnaire, with sensitivity (0.915 vs. 0.404), specificity (0.704 vs. 0.788) and AUC (0.809 vs. 0.571).

**Conclusion** The SABIHC2 machine learning model provides a simple and accurate assessment of moderate-severe OSA, especially for those without significant daytime sleepiness.

**Keywords:** obstructive sleep apnea, machine learning, anthropometric, screening

### Strengths and limitations of this study

- This is the first study to propose and validate facio-cervical measurements, which have been widely used in predicting difficult intubation, are important risk factors for screening moderate-severe OSA in Chinese subjects.
- Our SABIHC2 model, which is based on facio-cervical and anthropometric measurements, can be an effective and objective screening tool for OSA, independent of symptoms and comorbidities.
- The results obtained are hard to generalise for other populations, because the study cohort was based on Chinese population.
- The sample size was relatively small, and it was a single-centre study, which may affect the validation of the machine-learning algorithm model.

## INTRODUCTION

Obstructive sleep apnea (OSA) is a common breathing sleep disorder that affects about 936 million adults globally,<sup>1</sup> of which about 80% are undiagnosed patients.<sup>2</sup> In Chinese population, 175 million adults have mild to severe obstructive sleep apnea and 65 million adults have moderate to severe obstructive sleep apnea.<sup>1</sup> In addition to cardiovascular injury and metabolic syndrome, OSA has recently been regarded as a risk factor for perioperative complications, including hypoxaemia, pneumonia, pulmonary embolism, unplanned transfer to the intensive care unit, and even death, especially for those who accepted abdominal or vascular surgery.<sup>3</sup> 68.5% of OSA patients were not diagnosed before surgery.<sup>4</sup> Guidelines have been recommended to develop a local protocol for screening possible OSA patients before elective surgery.<sup>5,6</sup> The most common screening scales, including STOP-BANG, Berlin questionnaire, and OSA50, are mainly based on symptoms and comorbidities,<sup>7</sup> which might lead to missed diagnosis for those without significant daytime sleepiness. Several factors contribute to the pathogenesis of OSA, including obesity, facio-cervical anatomy, and alteration in pharyngeal muscle function, etc.<sup>8</sup> Asians have relatively smaller upper airways compared to Caucasians.<sup>9,10</sup> Facio-cervical characteristics may predict OSA for Asians, such as thyromental distance (TMD), thyro-sternum distance (TSD), maximum interincisal distance (MID), and Mallampati test score, which have been widely used in predicting difficult intubation.<sup>11</sup> However, no studies assessed whether facio-cervical characteristics are suitable for predicting OSA. Thus, it is necessary to evaluate the relationship between facio-cervical characteristics and OSA.

During the past two decades, machine learning models have provided simple but effective approaches for improving diagnostic accuracy.<sup>12</sup> Support vector model (SVM) is a well-known classification technique and has achieved great success in bioinformatics applications. Thus, the study aimed to build a new model via SVM and monitor its effectiveness in predicting OSA.

## METHODS

### Study design

Participants with suspected OSA (snoring, witnessed apnea, or excessive daytime sleepiness, etc.) were enrolled in the study from Ruijin Hospital, Shanghai Jiao Tong University School of Medicine

1  
2  
3 between February 2019 and August 2020. All participants underwent anthropometric measurements  
4 and subsequent overnight polysomnography (PSG). Participants were divided into a deal group  
5 (apnea-hypopnoea index, AHI<15 events·h<sup>-1</sup>) and a no-deal group (AHI≥15 events·h<sup>-1</sup>). For proper  
6  
7  
8  
9  
10 set-up of the machine learning model, all participants were randomly partitioned into a training set  
11 and a validation set according to a ratio of 7:3. Exclusion criteria: (1) with severe cognitive  
12  
13  
14  
15  
16  
17  
18  
19  
20  
21  
22  
23  
24  
25  
26  
27  
28  
29  
30  
31  
32  
33  
34  
35  
36  
37  
38  
39  
40  
41  
42  
43  
44  
45  
46  
47  
48  
49  
50  
51  
52  
53  
54  
55  
56  
57  
58  
59  
60

### **Clinical characteristics and anthropometric measurements**

Age, sex, height, weight, BMI, neck circumference (NC), waist circumference (WC), Epworth  
Sleepiness Scale (ESS), and STOP-BANG data were recorded. Facio-cervical measurements  
including Mallampati score, MID, TMD, and TSD were measured. The Mallampati score was  
evaluated when participants were asked to sit upright and open their mouths as wide as possible. In  
grade I, the entire uvula, faucial pillar, and soft palate are visible. In grade II, part of the uvula and  
palate are visible. In grade III, the soft palate is visible, but the uvula is obscured.<sup>13</sup> MID was recorded  
by asking the participant to sit upright and open the mouth as wide as possible.<sup>14</sup> The TMD was  
measured as the straight distance between the thyroid notch and the lower border of the mental  
prominence, while the head was fully extended, and the mouth closed (Figure 1).<sup>15</sup> TSD was  
measured as the distance between the thyroid notch and the upper border of the sternum (Figure 1).  
The distance was rounded to the nearest 0.5 cm. The ratios of height to TMD (H/TMD) and height to  
TSD (H/TSD) were calculated.<sup>15</sup>

### **PSG**

All participants underwent overnight PSG. No coffee, tea, cola-containing products or sedative-  
hypnotics were taken before sleep. The PSG monitoring included electroencephalography,  
electrooculography, chin electromyography, electrocardiography, measurements of ribcage and



1  
2  
3 abdominal movements, and airflow pressure and thermistor (Alice 5, Philips Respironics, USA), with  
4 the addition of oxygen saturation (Nonin, Herrsching, Germany). Sleep data were scored manually by  
5 registered polysomnographer of the United States according to American Academy of Sleep Medicine  
6 Recommendations (AASM).<sup>16</sup> The definition of arousal was based on the AASM guidelines. The  
7 diagnosis of moderate-severe OSA was defined by the presence of an obstructive AHI $\geq$ 15/h  
8 according to AASM guidelines.  
9  
10  
11  
12  
13  
14  
15

## 16 **Model construction**

### 17 Covariates

18  
19 Differences in variables between the deal group and the no-deal group were assessed using t-test or  
20 chi-square test. Variables with  $p < 0.05$  were chosen as covariates to set up the machine-learning  
21 model. The effective of covariates were further evaluated by crude odds ratios (ORs) and adjusted OR  
22 by controlling for BMI. Statistical analysis was conducted using IBM SPSS software (version 24.0,  
23 IL, USA).  
24  
25  
26  
27  
28  
29  
30

### 31 Model construction via SVM

32  
33 SVM is a representative machine-learning algorithm for classification, which could be viewed as a  
34 nonlinear regression model. We used the SVM to capture the potential hyperplane that maximises the  
35 margin between the deal group and the no-deal group. The SVM has the following format:  
36  
37  
38  
39

$$40 \quad C = \sum_{i=1}^n \alpha_i k(x_i, x) + b$$

41  
42 Where  $c$  is the output of the model based on the new data  $x$ , which could be regarded as the classifier  
43 (0 or 1),  $x_i$  ( $i=1, \dots, n$ ) is the training dataset,  $\alpha_i$  and  $b$  are parameters determined by the algorithm.<sup>17</sup>  
44  
45

46 We used the Gaussian radial basis function as the kernel function, with  $\gamma$  of 0.33 and the box  
47 constraint set to 10.  
48  
49

50 Based on the results of the statistical analysis, sex, age, NC, WC, BMI, MID, and H/TSD were set as  
51 independent variables ( $p < 0.05$ ). For the problem of multicollinearity, each participant was normalised  
52 and the principal component analysed before evaluating the SVM model. The SVM model, namely  
53 SABIHC, i.e. *sex*, *age*, *BMI*, *MID*, *H/TSD*, *NC*, and *WC (2 Cs)* was estimated by the training dataset  
54  
55  
56  
57  
58  
59  
60

(n=337, 70%); this model was then applied to predict OSA in the testing dataset (n=144, 30%). The flow chart including screening, randomisation and algorithm is presented in Figure 2.

The screening performance was assessed by means of sensitivity, specificity and area under the curve (AUC), negative likelihood ratio (-LR) and positive likelihood ratio (+LR) and accuracy. Visual optimal hyperplanes for the Support Vector Machine are shown in Figure 3. Finally, we compared the difference in predictive power between the STOP-BANG questionnaire and the SVM model. Analyses were performed using the Scikit-learn package (0.20.3) based on Python (3.5.1).

**Table 1** Subject demographics, crude and adjusted associations between morphometric variables and OSA

|                             | AHI<15<br>(n=171) | AHI>15<br>(n=310) | P*     | crude OR (95% CI)  | adjusted OR for<br>BMI (95% CI) |
|-----------------------------|-------------------|-------------------|--------|--------------------|---------------------------------|
| General characteristics     |                   |                   |        |                    |                                 |
| Male (%)                    | 93(54.39%)        | 232(74.84%)       | <0.001 | 0.401(0.270-0.595) | 0.463(0.308-0.697)              |
| Age                         | 44.05±13.80       | 49.11±12.08       | <0.001 | 1.032(1.016-1.048) | 1.037(1.021-1.054)              |
| NC                          | 37.63±3.74        | 39.83±4.20        | <0.001 | 1.146(1.090-1.205) | 1.121(0.054-1.193)              |
| WC                          | 90.58±11.93       | 97.39.76±10.20    | <0.001 | 1.109(1.041-1.081) | 1.074(1.041-1.107)              |
| BMI                         | 25.18±4.16        | 26.85±4.04        | <0.001 | 1.109(1.056-1.166) | NA                              |
| Facio-cervical measurements |                   |                   |        |                    |                                 |
| MID                         | 4.76±0.79         | 4.94±0.92         | 0.028  | 1.275(1.025-1.585) | 1.298(1.037-1.626)              |
| Mallampati test=1           | 77(45.02%)        | 118(38.06%)       |        |                    |                                 |
| Mallampati test=2           | 54(31.58%)        | 88(28.39%)        | 0.120  | 0.589(0.371-0.938) | 0.679(0.421-1.095)              |
| Mallampati test=3           | 40(23.40%)        | 104(33.55%)       |        | 0.627(0.381-1.031) | 0.713(0.428-1.186)              |
| H/TMD                       | 5.43±0.66         | 5.34±0.78         | 0.185  | 1.849(0.659-1.095) | 0.856(0.661-1.108)              |
| H/TSD                       | 5.80±0.75         | 5.18±0.74         | <0.001 | 0.292(0.212-0.404) | 0.282(0.205-0.393)              |

Sex, age, body mass index, neck circumference, waist circumference, maximum interincisal distance, and height to thyro-sternum distance ratio were chosen to build machine-learning model, due to the significant difference between the two groups ( $p<0.05$ ).

Data are presented as mean± SD or n (%). \*: t test or chi-square test as appropriate. NA: not available.

Abbreviation: NC; neck circumference; WC: waist circumference; BMI: body mass index; MID: maximum interincisal distance; H/TMD: ratio of height to thyromegaly distance; H/TSD: ratio of height to thyro-sternum distance.

## RESULTS

1  
2  
3 A total of 512 participants were recruited for the study at first, among which 31 patients were  
4 excluded due to short total sleep time (<200 min, 13 cases) or missing data (18 cases). Finally, 481  
5 participants (325 males and 156 females; aged between 14-77 y) were enrolled in our study (Figure  
6  
7  
8  
9  
10 2). The participants were divided into the no-deal ( $AHI < 15$  events·h<sup>-1</sup>, n=171, mean AHI  $42.4 \pm 20.7$   
11  
12  
13 events·h<sup>-1</sup>) and the deal group ( $AHI \geq 15$  events·h<sup>-1</sup>, n=310, mean AHI  $7.01 \pm 4.47$  events·h<sup>-1</sup>).

14  
15  
16 Increased BMI, NC, WC, older age, and higher percentage of males were found in deal group  
17  
18 ( $p < 0.001$ ). Meanwhile, they had higher MAI ( $32.5 \pm 13.2$  vs  $16.4 \pm 8.3$ ) and lower LSpO<sub>2</sub> ( $72.1 \pm$   
19  
20  
21  $13.3$  vs  $87.13 \pm 6.3$ ) than those in the no-deal group ( $p < 0.001$ ) (Table 1).

### 22 **Associations Between Facio-cervical Characteristics and OSA**

23  
24 Greater MID ( $4.94$  vs  $4.76$ ,  $p = 0.028$ ) and smaller H/TSD ( $5.18$  vs  $5.80$ ,  $p < 0.001$ ) were found in the  
25  
26 deal group compared to no-deal group. MID (OR=1.275, adjusted OR=1.298) and H/TSD (OR=0.292,  
27  
28 adjusted OR=0.282) are independent risk factors for OSA, even after controlling for BMI. No  
29  
30 significant inter-group differences were found in Mallampati test scores and H/TMD ( $p > 0.05$ ) (Table  
31  
32  
33 1).

### 34 **Set-up and Predictive Accuracy of the SABIHC2 model**

35  
36 Age, sex, NC, WC, BMI, and facio-cervical measurements (MID, H/TSD) were chosen as covariates  
37  
38 as a significant difference was found between the two groups. Of all participants, 337 patients (70%)  
39  
40 were randomised to the training dataset and 144 patients (30%) were randomised to the testing  
41  
42 dataset. We set up the SABIHC2 model based on training dataset (n=337), whose name refers to sex,  
43  
44 **age, BMI, MID, H/TSD, NC, and WC (2 Cs)**. To predict moderate-severe OSA, the accuracy of  
45  
46 SABIHC2 model was 90.1%, of which 92.58% for the deal group (blue dots in purple area), and  
47  
48 72.0% for no-deal group (green dots in green area; Figure 3).

49  
50  
51 Then, the model was verified using the testing dataset (n=144) to predict moderate-severe OSA. The  
52  
53 AUC was 0.874 (95% CI, 0.702 to 0.872), with a sensitivity of 87.4% and specificity of 70.0%.  
54  
55 Corresponding LR<sup>+</sup> and LR<sup>-</sup> were 2.91 and 0.18, respectively (Table 2, Figure 4A).

**Table 2** Performance of SABIHC2 model

|           |                  | Sensitivity | Specificity | AUC   | 95% CI      | +LR   | -LR   |
|-----------|------------------|-------------|-------------|-------|-------------|-------|-------|
| SABIHC2   | training dataset | 0.949       | 0.727       | 0.838 | 0.787-0.889 | 3.480 | 0.070 |
|           | testing dataset  | 0.874       | 0.700       | 0.787 | 0.702-0.872 | 2.913 | 0.180 |
| STOP-BANG | testing dataset  | 0.684       | 0.500       | 0.597 | 0.499-0.694 | 0.632 | 1.368 |

Abbreviations: SABIHC2 = Sex-age-BMI-MID-H/TSD-NC-WC. +LR: positive likelihood ratio; -LR: negative likelihood ratio

### Discriminative Ability of the SABIHC2 model and STOP-BANG questionnaire

To compare the predictive ability for moderate-severe OSA between the SABIHC2 model and STOP-BANG questionnaire, we calculated the ROC curve of STOP-BANG for moderate-severe OSA on the testing dataset. The AUC based on testing dataset was 0.597 (95% CI, 0.499 to 0.694), with a sensitivity of 68.4% and specificity of 50.0%. (Table 2, Figure 4A).

As the STOP-BANG questions are based on the symptoms and comorbidities and may result in missed diagnoses, we further compared whether there are differences in the predictive capacity of SABIHC2 model and STOP-BANG questionnaire both for the symptomatic ( $ESS \geq 10$ ) and asymptomatic patients ( $ESS < 10$ ) within the testing dataset. For asymptomatic patients, the SABIHC2 model demonstrated better predictive ability than STOP-BANG questionnaire [AUC (0.809 vs. 0.571)], with sensitivity (0.915 vs. 0.404), and specificity (0.704 vs. 0.788). Similarly, SABIHC2 model had higher predictive power than STOP-BANG questionnaire in patients experiencing sleepiness ( $ESS \geq 10$ ) [AUC (0.764 vs. 0.606)], with sensitivity (0.833 vs. 0.813), and specificity (0.696 vs. 0.478) (Figure 4B).

## DISCUSSION

1  
2  
3 In the current study, we measured a broad range of anthropometric variables and assessed the  
4 association with moderate-severe OSA. Sex, age, BMI, MID, H/TSD, NC, and WC were significant  
5 determining factors. We also developed a SABIHC2 predictive model, which provides a simple and  
6 accurately assessment of OSA.  
7  
8  
9

10  
11  
12 Facio-cervical measurements are essential risk factors for OSA. The majority of previous studies  
13 focused on the soft tissue of the upper airway. A significant correlation between the oropharyngeal  
14 soft tissue (Mallampati test and tonsillar enlargement, etc.) and AHI was reported.<sup>18,19</sup> However,  
15 Mallampati test was not a significant parameter in our study. It is possible that the association  
16 between soft tissue and OSA is weak in Asian populations.<sup>10</sup> No previous studies explored the  
17 relationship between moderate-severe OSA and facio-cervical measurements, such as MID, H/TMD,  
18 and H/TSD, which have been frequently used to evaluate difficult intubation.<sup>11</sup> Herein, we found that  
19 MID and H/TSD were strongly associated with moderate-severe OSA, and H/TSD showed a  
20 remarkable predictive power for OSA, even controlling for BMI. The result may suggest that H/TSD  
21 is a potential predictor for moderate-severe OSA in Chinese subjects.  
22  
23  
24  
25  
26  
27  
28  
29  
30  
31  
32

33 As indicated previously, the overall scarcity and labour- and financially-onerous nature of PSG has  
34 prompted exploration of other suitable screening approaches, ranging from questionnaires to  
35 simplified multichannel recording. The STOP-BANG is one of the most widely used questionnaires.  
36 Some limitations of the STOP-BANG questionnaire should be considered. Firstly, it is based on  
37 simplified categories (0 or 1) and this might reduce its screening accuracy.<sup>20</sup> Secondly, the evaluation  
38 is based on symptoms and comorbidities, which may lead to omission of diagnosis for snorers without  
39 significant daytime sleepiness or hypertension.<sup>21</sup> Thus, we developed a new screening tool based on  
40 facio-cervical measurements by machine learning.  
41  
42  
43  
44  
45  
46  
47  
48  
49

50 Considering non-linear relationships and data interaction effects,<sup>22</sup> the machine learning algorithm  
51 (SVM) was used to find the complex linkages between variables. Distinct from previous machine  
52 learning models that were based on age, sex, NC, WC, and BMI,<sup>23,24</sup> we included the structural facio-  
53 cervical measurements to construct the SABIHC2 model. This showed much better performance than  
54 the STOP-BANG in screening for OSA.  
55  
56  
57  
58  
59  
60

1  
2  
3 The results confirmed that the SABIHC2 model performed better than the STOP-BANG  
4 questionnaire in predicting moderate-severe OSA, especially for asymptomatic patients (ESS < 10),  
5 demonstrating that it may be particularly useful for this cohort of patient. With increasing spread  
6 of smartphones, the SABIHC2 algorithm could be easily used in pre-operational screening for OSA  
7 via mobile application.  
8  
9  
10  
11  
12

13 To our knowledge, this is the first study examining the predictive power of facio-cervical  
14 measurements, which may become a new index to predict OSA besides sex, age, and BMI. However,  
15 several limitations should be mentioned. First, the study cohort was limited to the Chinese population.  
16 The results obtained are hard to generalise for other populations. Second, the cross-sectional design of  
17 our study makes it difficult to establish the causal relationship between variables. Third, sample size  
18 was relatively small, and it was a single-centre study, which may affect the validation of the machine-  
19 learning algorithm model.  
20  
21  
22  
23  
24  
25  
26  
27

28 In conclusion, we confirmed that facio-cervical measurements are important risk factors for screening  
29 moderate-severe OSA, and developed a validated machine learning algorithm that is based on facio-  
30 cervical and anthropometric measurements, called the SABIHC2 predictive model. The model is more  
31 effective than the STOP-BANG questionnaire in predicting moderate-severe OSA, especially for  
32 those without significant daytime symptoms.  
33  
34  
35  
36  
37  
38  
39  
40  
41  
42  
43  
44  
45  
46  
47  
48  
49  
50  
51  
52  
53  
54  
55  
56  
57  
58  
59  
60

**REFERENCES**

1. Benjafield AV, Ayas NT, Eastwood PR, et al. Estimation of the global prevalence and burden of obstructive sleep apnoea: a literature-based analysis. *Lancet Respir Med*. 2019;7(8):687-698.
2. Young T, Evans L, Finn L, et al. Estimation of the clinically diagnosed proportion of sleep apnea syndrome in middle-aged men and women. *Sleep*. 1997;20(9):705-706.
3. Kaw R, Pasupuleti V, Walker E, et al. Postoperative complications in patients with obstructive sleep apnea. *Chest*. 2012; 141: 436-41.
4. Singh M, Liao P, Kobah S, et al. Proportion of surgical patients with undiagnosed obstructive sleep apnoea. *Br J Anaesth*. 2013 Apr;110(4):629-36.
5. American Society of Anesthesiologists Task Force on Perioperative Management of patients with obstructive sleep apnea. Practice guidelines for the perioperative management of patients with obstructive sleep apnea: an updated report by the American Society of Anesthesiologists Task Force on Perioperative Management of patients with obstructive sleep apnea. *Anesthesiology*. 2014;120(2):268-286. Available: <https://pubmed.ncbi.nlm.nih.gov/24346178/>
6. Dalesio NM, Hendrix CW, McMichael DH, et al. Effects of Obesity and Leptin Deficiency on Morphine Pharmacokinetics in a Mouse Model. *Anesth Analg*. 2016 Dec;123(6):1611-1617.
7. Kee K, Dixon J, Shaw J, et al. Comparison of Commonly Used Questionnaires to Identify Obstructive Sleep Apnea in a High-Risk Population. *J Clin Sleep Med*. 2018; 14: 2057-64.
8. Lévy P, Kohler M, McNicholas WT, et al. Obstructive sleep apnoea syndrome. *Nat Rev Dis Primers*. 2015;7(1):15015.
9. Sutherland K, Lee RW, Cistulli PA. Obesity and craniofacial structure as risk factors for obstructive sleep apnoea: impact of ethnicity. *Respirology*. 2012; 17: 213-22.
10. Schorr F, Kayamori F, Hirata RP, et al. Different Craniofacial Characteristics Predict Upper Airway Collapsibility in Japanese-Brazilian and White Men. *Chest*. 2016; 149: 737-46.
11. Roth D, Pace NL, Lee A, et al Airway physical examination tests for detection of difficult airway management in apparently normal adult patients. *Cochrane Database Syst Rev* 2018; 5: CD008874. Available: [http:// doi:10.1111/ijn.12805](http://doi:10.1111/ijn.12805)

- 1  
2  
3 12. Obermeyer Z, Emanuel EJ. Predicting the Future - Big Data, Machine Learning, and Clinical  
4 Medicine. *N Engl J Med* 2016; 375: 1216-9.  
5  
6  
7 13. Menon SM, Sampangiramaiah S, Mathew M. Cross Sectional Observational Study Performed to  
8 See for Relation of Mallampati Score and Extended Mallampati Score with Body Mass Index. *J Clin*  
9 *Diagn Res* 2017; 11: Ug01-ug03.  
10  
11  
12 14. Den Herder C, Schmeck J, Appelboom DJ, et al. Risks of general anaesthesia in people with  
13 obstructive sleep apnoea. *BMJ* 2004; 329: 955-9.  
14  
15  
16 15. Schmitt HJ, Kirmse M, Radespiel-Troger M. Ratio of patient's height to thyromental distance  
17 improves prediction of difficult laryngoscopy. *Anaesth Intensive Care*. 2002; 30: 763-5.  
18  
19  
20 16. The Report of an American Academy of Sleep Medicine Task Force. Sleep-related breathing  
21 disorders in adults: recommendations for syndrome definition and measurement techniques in clinical  
22 research. *Sleep*. 1999; 22: 667-89.  
23  
24  
25 17. Liu WT, Wu HT, Juang JN, et al Prediction of the severity of obstructive sleep apnea by  
26 anthropometric features via support vector machine. *PLoS ONE*. 2017; 12: e0176991. Available:  
27 <http://doi:10.1371/journal.pone.0176991>  
28  
29  
30 18. Schellenberg JB, Maislin G, Schwab RJ. Physical findings and the risk for obstructive sleep apnea.  
31 The importance of oropharyngeal structures. *Am J Respir Crit Care Med*. 2000; 162: 740-8.  
32  
33  
34 19. Schwab RJ, Leinwand SE, Bearn CB, et al Digital Morphometrics: A New Upper Airway  
35 Phenotyping Paradigm in OSA. *Chest* 2017; 152: 330-42.  
36  
37  
38 20. Chung F, Abdullah HR, Liao P. STOP-BANG Questionnaire: A Practical Approach to Screen for  
39 Obstructive Sleep Apnea. *Chest*. 2016; 149(3):631-638.  
40  
41  
42 21. Ye L, Pien GW, Ratcliffe SJ, et al. The different clinical faces of obstructive sleep apnoea: a  
43 cluster analysis. *Eur Respir J*. 2014; 44:1600-7.  
44  
45  
46 22. Linnen DT, Escobar GJ, Hu X, et al. Statistical Modeling and Aggregate-Weighted Scoring  
47 Systems in Prediction of Mortality and ICU Transfer: A Systematic Review. *J Hosp Med*. 2019;  
48 14:161-9.  
49  
50  
51  
52  
53  
54  
55  
56  
57  
58  
59  
60



1  
2  
3 23.Mencar C, Gallo C, Mantero M, et al. Application of machine learning to predict obstructive sleep  
4 apnea syndrome severity. *Health Informatics J.* 2019;1460458218824725. Available: [http://](http://doi:10.1177/1460458218824725)  
5  
6  
7 doi:10.1177/1460458218824725  
8

9 24.Bozkurt S, Bostanci A, Turhan M. Can Statistical Machine Learning Algorithms Help for  
10 Classification of Obstructive Sleep Apnea Severity to Optimal Utilization of Polysomnography  
11 Resources? *Methods Inf Med.* 2017; 56:308–18.  
12  
13  
14  
15

### 16 17 18 **Author affiliations**

19  
20 <sup>1</sup>Department of Respiratory and Critical Care Medicine, Ruijin Hospital, Shanghai Jiao Tong  
21 University School of Medicine, Shanghai 200025, China  
22

23  
24 <sup>2</sup>Institute of Respiratory Medicine, Shanghai Jiao Tong University School of Medicine, Shanghai  
25 200025, China  
26  
27

28 **Acknowledgements** The authors thank Peizhe Liu for his assistance with the SVM algorithm.  
29

30 **Author contributions** Liu Zhang and Ya Ru Yan drafted the manuscript, had full access to all the  
31 data, and takes responsibility for the integrity of the data and the accuracy of the data analysis. Shi Qi  
32 Li contributed to data analysis and interpretation. Qing Yun Li and Shi Qi Li contributed to study  
33 conception and design. Hong Peng Li, Ying Ni Lin, Ning Li, Xian Wen Sun, Yong Jie Ding  
34 contributed to data collection, critical revision. Hong Peng Li and Qing Yun Li contributed to final  
35 approval of the manuscript.  
36  
37  
38  
39  
40  
41  
42

43 **Funding** This work was supported by grants from National Key R&D Program of China  
44 (2018YFC1311900) and the National Natural Science Foundation of China (founding no. 81770084,  
45 81700084, 81570082). No conflicts of interest are to be reported  
46  
47  
48

49 **Competing interests** None declared.  
50

51 **Patient and Public Involvement statement** Patients or the public were not involved in the design, or  
52 conduct, or reporting, or dissemination plans of our research  
53

54 **Ethics approval** The study was approved by the ethics committee of the Shanghai Jiao Tong  
55 University School of Medicine at Ruijin Hospital, with the following reference number: 2018-107.  
56  
57  
58

59 **Data availability statement** Data are available upon reasonable request.  
60

1  
2  
3  
4  
5  
6  
7  
8 **FIGURE LEGENDS:**  
9

10 **Figure 1.** TMD and TSD measurements.

11  
12 Abbreviations: TMD: the straight distance between the thyroid notch and the lower border of the  
13 mental prominence; TSD: the distance between the thyroid notch and the upper border of the sternum  
14  
15

16  
17  
18 **Figure 2.** Flow chart showing screening, randomization and algorithm.

19  
20 481 participants were enrolled in our study after excluding 49 patients. Age, sex, NC, WC, BMI, and  
21 facio-cervical measurements (MID, H/TSD) were potential risk factors for OSA due to the significant  
22 difference between the two groups. We chose the following parameters to setup the SABIHC2 model  
23 based on training dataset, whose name refers to sex, age, BMI, MID, H/TSD, NC, and WC (2 Cs).  
24  
25 Then, the model was verified on testing dataset.  
26  
27

28  
29 Abbreviations: BMI: body mass index; MID: maximum interincisal distance; H/TMD: ratio of height  
30 to thyromegaly distance; H/TSD: ratio of height to thyro-sternum distance; NC: neck circumference;  
31  
32 WC: waist circumference;  
33  
34  
35  
36  
37  
38

39 **Figure 3.** Optimal hyperplane for Support Vector Machine (SVM). The green area means the SVM  
40 predicting  $AHI < 15 \text{ events}\cdot\text{h}^{-1}$ , the purple means the SVM predicts the  $AHI \geq 15 \text{ events}\cdot\text{h}^{-1}$ . Green  
41 dots represent no-deal groups ( $AHI < 15 \text{ events}\cdot\text{h}^{-1}$ ), blue dots represent deal groups ( $AHI \geq 15$   
42  $\text{events}\cdot\text{h}^{-1}$ ). The accuracy of SABIHC2 model was 90.1%, of which 92.58 % for the deal group (blue  
43 dots in purple area), and 72.0 % for no-deal group (green dots in green area). The boundary was  
44  
45 obtained from the SVM classifier and the figure was created using Python.  
46  
47  
48  
49

50  
51 Abbreviations: SVM: support vector machine; SABIHC2 model: sex, age, BMI, MID, H/TSD, NC,  
52 and WC (2 Cs).  
53  
54  
55  
56  
57

58 **Figure 4.** ROC curve of cross-validation.  
59  
60

1  
2  
3 A: The ROC curve of SABIHC2 model and STOP-BANG. The AUC of the SABIHC2 model based  
4 on the training database (n=336, 69.9%, brown line) was 0.949 (95% CI, 0.787 to 0.889), with a  
5 sensitivity of 94.9% and specificity of 72.7%. About testing database (n=145 30.1%, red line), the  
6 AUC was 0.874 (95% CI, 0.702 to 0.872), with a sensitivity of 87.4% and specificity of 70.0%. The  
7 ROC curve of STOP-BANG questionnaire (blue line) on the testing database was 0.597 (95% CI,  
8 0.499 to 0.694). STOP-BANG>2 showed the sensitivity and specificity of 83.2% and 22.0%,  
9 respectively, while STOP-BANG>4 with the sensitivity of 49.5% and specificity of 78.0%.  
10  
11 Blue: SVM based on training dataset; red: SVM based on testing dataset; brown: STOP-BANG based  
12 on testing dataset.  
13  
14

15  
16 B: The ROC curve of SABIHC2 model and STOP-BANG based on asymptomatic patients (ESS <  
17 10) and sleepiness patients (ESS ≥ 10). In asymptomatic patients, SABIHC2 model (red line)  
18 remarkably demonstrated better predictive ability than STOP-BANG questionnaire (dark blue line),  
19 with sensitivity (0.915 vs 0.404), specificity (0.704 vs 0.788) and AUC (0.809 vs 0.571). Similarly,  
20 SABIHC2 model (orange line) had higher predictive power than STOP-BANG questionnaire (soft  
21 blue line) in sleepiness patients (ESS ≥ 10), with sensitivity (0.833 vs 0.813), specificity (0.696 vs  
22 0.478) and AUC (0.764 vs 0.606)  
23  
24

25  
26 Abbreviations: AUC: the area under ROC curve; SVM: support vector machine; CIs: confidence  
27 intervals.  
28  
29  
30  
31  
32  
33  
34  
35  
36  
37  
38  
39  
40  
41  
42  
43  
44  
45  
46  
47  
48  
49  
50  
51  
52  
53  
54  
55  
56  
57  
58  
59  
60

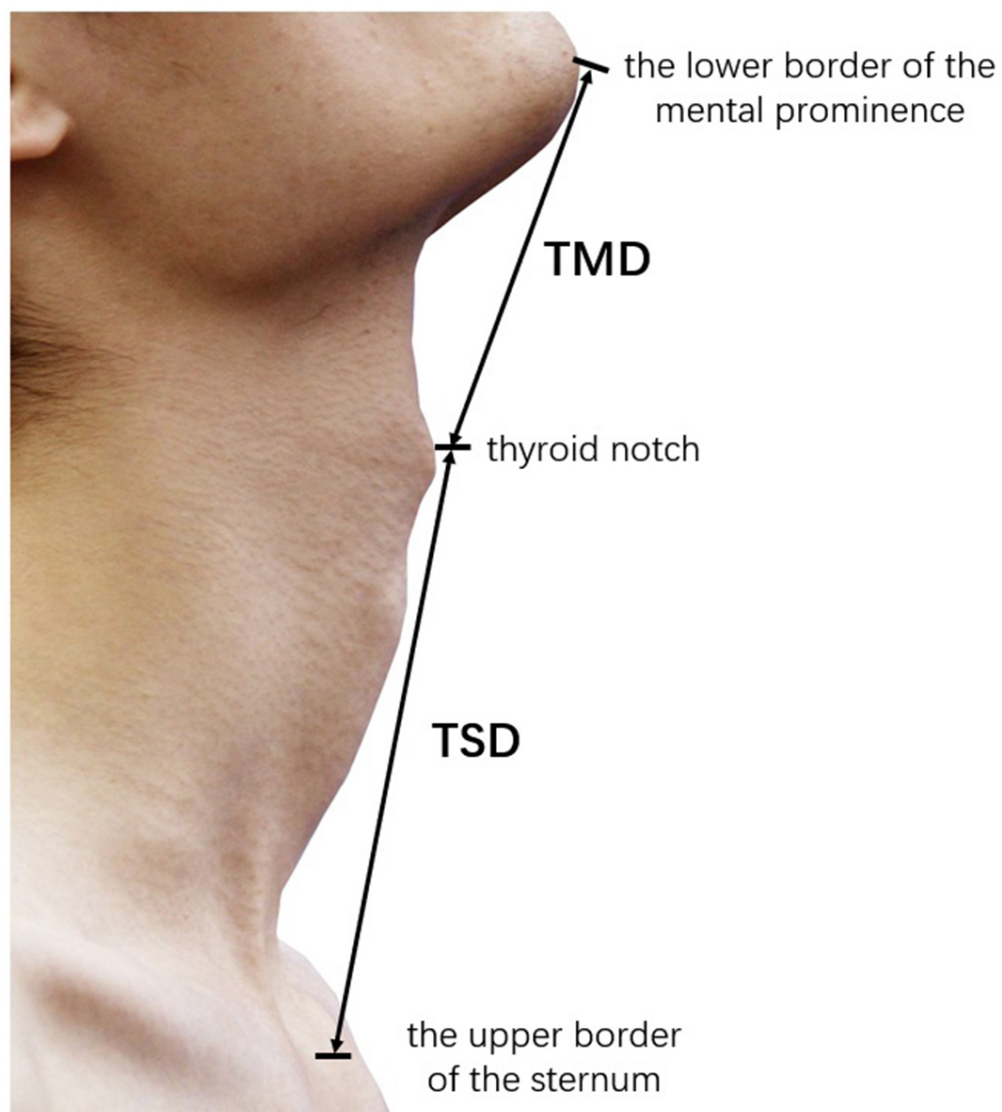

90x100mm (300 x 300 DPI)

1  
2  
3  
4  
5  
6  
7  
8  
9  
10  
11  
12  
13  
14  
15  
16  
17  
18  
19  
20  
21  
22  
23  
24  
25  
26  
27  
28  
29  
30  
31  
32  
33  
34  
35  
36  
37  
38  
39  
40  
41  
42  
43  
44  
45  
46  
47  
48  
49  
50  
51  
52  
53  
54  
55  
56  
57  
58  
59  
60

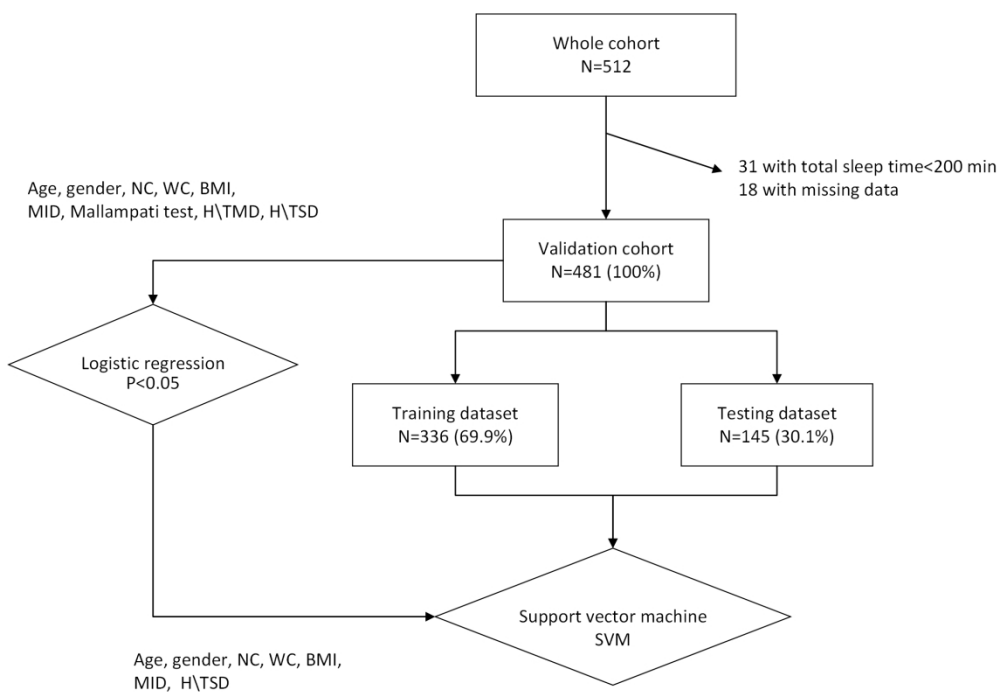

189x131mm (300 x 300 DPI)

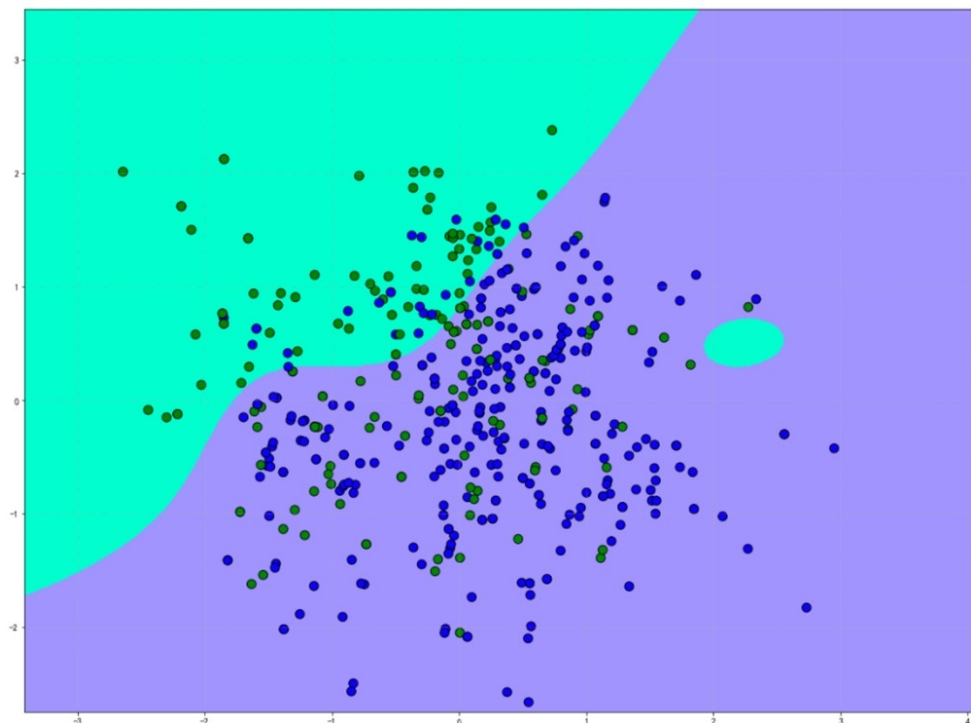

86x63mm (300 x 300 DPI)

1  
2  
3  
4  
5  
6  
7  
8  
9  
10  
11  
12  
13  
14  
15  
16  
17  
18  
19  
20  
21  
22  
23  
24  
25  
26  
27  
28  
29  
30  
31  
32  
33  
34  
35  
36  
37  
38  
39  
40  
41  
42  
43  
44  
45  
46  
47  
48  
49  
50  
51  
52  
53  
54  
55  
56  
57  
58  
59  
60

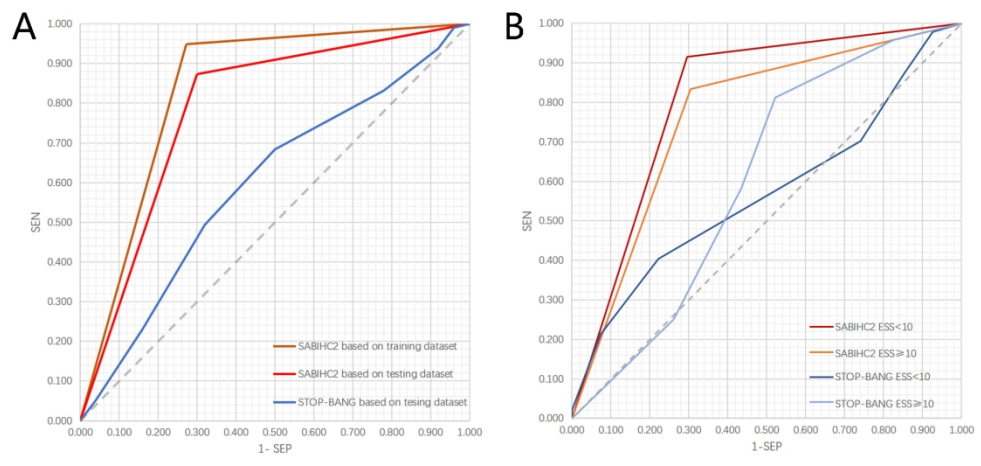

189x100mm (300 x 300 DPI)

# BMJ Open

## Screening value of Facio-cervical Measurements Based Machine Learning Model on moderate-severe OSA in Chinese Population

|                                 |                                                                                                                                                                                                                                                                                                                                                                                                                                                                                                                                                                                                                                                                                                                                                                                                                                                                                                                                                         |
|---------------------------------|---------------------------------------------------------------------------------------------------------------------------------------------------------------------------------------------------------------------------------------------------------------------------------------------------------------------------------------------------------------------------------------------------------------------------------------------------------------------------------------------------------------------------------------------------------------------------------------------------------------------------------------------------------------------------------------------------------------------------------------------------------------------------------------------------------------------------------------------------------------------------------------------------------------------------------------------------------|
| Journal:                        | <i>BMJ Open</i>                                                                                                                                                                                                                                                                                                                                                                                                                                                                                                                                                                                                                                                                                                                                                                                                                                                                                                                                         |
| Manuscript ID                   | bmjopen-2020-048482.R1                                                                                                                                                                                                                                                                                                                                                                                                                                                                                                                                                                                                                                                                                                                                                                                                                                                                                                                                  |
| Article Type:                   | Original research                                                                                                                                                                                                                                                                                                                                                                                                                                                                                                                                                                                                                                                                                                                                                                                                                                                                                                                                       |
| Date Submitted by the Author:   | 12-Apr-2021                                                                                                                                                                                                                                                                                                                                                                                                                                                                                                                                                                                                                                                                                                                                                                                                                                                                                                                                             |
| Complete List of Authors:       | zhang, liu; Shanghai Jiao Tong University Medical School Affiliated Ruijin Hospital<br>Yan, Ya Ru; Shanghai Jiao Tong University Medical School Affiliated Ruijin Hospital<br>Li, Shi Qi; Shanghai Jiao Tong University Medical School Affiliated Ruijin Hospital<br>Li, Hong Peng; Shanghai Jiao Tong University Medical School Affiliated Ruijin Hospital<br>Lin, Ying Ni; Shanghai Jiao Tong University Medical School Affiliated Ruijin Hospital<br>Li, Ning; Shanghai Jiao Tong University Medical School Affiliated Ruijin Hospital<br>Sun, Xian Wen; Shanghai Jiao Tong University Medical School Affiliated Ruijin Hospital<br>Ding, Yong Jie; Shanghai Jiao Tong University Medical School Affiliated Ruijin Hospital<br>Li, Chuan Xiang; Shanghai Jiao Tong University Medical School Affiliated Ruijin Hospital<br>Li, Qing Yun; Shanghai Jiao Tong University Medical School Affiliated Ruijin Hospital, Department of Respiratory Medicine |
| <b>Primary Subject Heading</b>: | Respiratory medicine                                                                                                                                                                                                                                                                                                                                                                                                                                                                                                                                                                                                                                                                                                                                                                                                                                                                                                                                    |
| Secondary Subject Heading:      | Anaesthesia                                                                                                                                                                                                                                                                                                                                                                                                                                                                                                                                                                                                                                                                                                                                                                                                                                                                                                                                             |
| Keywords:                       | PUBLIC HEALTH, SLEEP MEDICINE, Adult anaesthesia < ANAESTHETICS                                                                                                                                                                                                                                                                                                                                                                                                                                                                                                                                                                                                                                                                                                                                                                                                                                                                                         |
|                                 |                                                                                                                                                                                                                                                                                                                                                                                                                                                                                                                                                                                                                                                                                                                                                                                                                                                                                                                                                         |

SCHOLARONE™  
Manuscripts



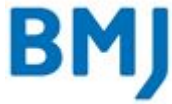

I, the Submitting Author has the right to grant and does grant on behalf of all authors of the Work (as defined in the below author licence), an exclusive licence and/or a non-exclusive licence for contributions from authors who are: i) UK Crown employees; ii) where BMJ has agreed a CC-BY licence shall apply, and/or iii) in accordance with the terms applicable for US Federal Government officers or employees acting as part of their official duties; on a worldwide, perpetual, irrevocable, royalty-free basis to BMJ Publishing Group Ltd ("BMJ") its licensees and where the relevant Journal is co-owned by BMJ to the co-owners of the Journal, to publish the Work in this journal and any other BMJ products and to exploit all rights, as set out in our [licence](#).

The Submitting Author accepts and understands that any supply made under these terms is made by BMJ to the Submitting Author unless you are acting as an employee on behalf of your employer or a postgraduate student of an affiliated institution which is paying any applicable article publishing charge ("APC") for Open Access articles. Where the Submitting Author wishes to make the Work available on an Open Access basis (and intends to pay the relevant APC), the terms of reuse of such Open Access shall be governed by a Creative Commons licence – details of these licences and which [Creative Commons](#) licence will apply to this Work are set out in our licence referred to above.

Other than as permitted in any relevant BMJ Author's Self Archiving Policies, I confirm this Work has not been accepted for publication elsewhere, is not being considered for publication elsewhere and does not duplicate material already published. I confirm all authors consent to publication of this Work and authorise the granting of this licence.

1  
2  
3 **Screening value of Facio-cervical Measurements Based Machine Learning Model on moderate-**  
4 **severe OSA in Chinese Population**  
5

6  
7 Liu Zhang\*<sup>1,2</sup>, Ya Ru Yan\*<sup>1,2</sup>, Shi Qi Li \*<sup>1,2</sup>, Hong Peng Li <sup>1,2</sup>, Ying Ni Lin <sup>1,2</sup>, Ning Li <sup>1,2</sup>, Xian Wen  
8 Sun <sup>1,2</sup>, Yong Jie Ding<sup>1,2</sup>, Chuan Xiang Li<sup>1,2</sup>, Qing Yun Li<sup>1,2</sup>  
9

10  
11 <sup>1</sup>Department of Respiratory and Critical Care Medicine, Shanghai Jiao Tong University Medical  
12 School Affiliated Ruijin Hospital, Shanghai 200025, China  
13

14  
15 <sup>2</sup>Institute of Respiratory Medicine, Shanghai Jiao Tong University Medical School Affiliated Ruijin  
16 Hospital, Shanghai 200025, China  
17

18  
19 \* co-first authors  
20  
21

22  
23  
24 **Corresponding author full contact details:**  
25

26 Name: Qing Yun Li, M.D, Ph.D.

27  
28 Address: Department of Respiratory and Critical Care Medicine, Shanghai Jiao Tong University  
29 Medical School Affiliated Ruijin Hospital, Shanghai 200025, China  
30

31  
32 Post code: 200025  
33

34 City: Shanghai

35  
36 Country: China  
37

38  
39 Email: [liqingyun68@hotmail.com](mailto:liqingyun68@hotmail.com)  
40

41 All authors have seen and approved the manuscript  
42

43 Financial support: This work was supported by grants from National Key R&D Program of China  
44 (2018YFC1311900) and the National Natural Science Foundation of China (funding no. 81770084,  
45 81700084, 81570082).  
46  
47

48  
49 No conflicts of interest are to be reported.  
50  
51  
52  
53  
54  
55  
56  
57  
58  
59  
60

**ABSTRACT:**

**Objectives** Obstructive sleep apnea (OSA) has received much attention as a risk factor for perioperative complications and 68.5% OSA patients remain undiagnosed before surgery. Facio-cervical characteristics may screen OSA for Asians due to smaller upper airways compared to Caucasians. Thus, our study aimed to explore a machine-learning model to screen moderate-severe OSA based on facio-cervical and anthropometric measurements.

**Design** A cross-sectional study.

**Setting** Data were collected from the Shanghai Jiao Tong University School of Medicine affiliated Ruijin Hospital between February 2019 and August 2020.

**Participants** A total of 481 Chinese participants were included in the study.

**Primary and secondary outcome** (1) Identification moderate-severe OSA with apnea-hypopnea index (AHI)15 events·h<sup>-1</sup>. (2) Verification the machine learning model.

**Results** The SABIHC2 model (*Sex-Age-Body mass index-maximum Interincisal distance-ratio of Height to thyro-sternum distance-neck Circumference-waist Circumference*) was set up. The SABIHC2 model could screen moderate-severe OSA with area under the curve (AUC)=0.787, sensitivity of 0.874 and specificity of 0.700, and performed better than the STOP-BANG questionnaire, which showed AUC=0.597, sensitivity of 0.495 and specificity of 0.780. Especially for asymptomatic patients (ESS < 10), the SABIHC2 model demonstrated better predictive ability compared to the STOP-BANG questionnaire, with sensitivity (0.915 vs. 0.404), specificity (0.704 vs. 0.788) and AUC (0.809 vs. 0.571).

**Conclusion** The SABIHC2 machine learning model provides a simple and accurate assessment of moderate-severe OSA, especially for those without significant daytime sleepiness.

**Keywords:** obstructive sleep apnea, machine learning, anthropometric, screening

### Strengths and limitations of this study

- The study aims to propose and validate the association between facio-cervical measurements and moderate-severe OSA in Chinese subjects.
- This is the first study to set up a machine learning model based on facio-cervical measurements to predict moderate-severe OSA in Chinese population.
- Instead of most questionnaires based on symptoms and comorbidities, the SABIHC2 model which is entirely based on measurements, avoids the confounding effect of symptoms and comorbidities.
- The cross-sectional design of the study makes it difficult to establish the causal relationship between variables.
- The study is a single-centre study with relatively small sample size, and further confirmation with a large-sample, multi-centre, prospective clinical trial is needed in the future.

## INTRODUCTION

Obstructive sleep apnea (OSA) is a common breathing sleep disorder that affects about 936 million adults globally,<sup>1</sup> of which about 80% are undiagnosed patients.<sup>2</sup> In Chinese population, 175 million adults have mild to severe obstructive sleep apnea and 65 million adults have moderate to severe obstructive sleep apnea.<sup>1</sup> In addition to cardiovascular injury and metabolic syndrome, OSA has recently been regarded as a risk factor for perioperative complications, including hypoxaemia, pneumonia, pulmonary embolism, unplanned transfer to the intensive care unit, and even death, especially for those who received abdominal or vascular surgery.<sup>3</sup> The rates of postoperative cardiovascular events show a rise in moderate or severe OSA (25.1%) compared to no or mild OSA(16.8%).<sup>4</sup> 38% surgical patients had moderate or severe OSA, of which 68.5% were not diagnosed before surgery.<sup>5</sup> Guidelines have been recommended to develop a local protocol for screening possible OSA patients before elective surgery.<sup>6,7</sup> The most common screening scales, including STOP-BANG, Berlin questionnaire, and OSA50, are mainly based on symptoms and comorbidities,<sup>8</sup> which might lead to missed diagnosis for those without significant daytime sleepiness. Several factors contribute to the pathogenesis of OSA, including obesity, facio-cervical anatomy, and alteration in pharyngeal muscle function, etc.<sup>9</sup> Asians have relatively smaller upper airways compared to Caucasians.<sup>10</sup> Only in Asians, smaller upper airways are predictors of upper airway collapsibility, and an anatomic imbalance between tongue and mandible volume influenced upper airway collapsibility among Caucasians.<sup>11</sup> The above evidence prompts facio-cervical characteristics may predict OSA for Asians, such as thyromental distance (TMD), thyro-sternum distance (TSD), maximum interincisal distance (MID), and Mallampati test score, which have been widely used in predicting difficult intubation.<sup>12</sup> However, no studies assessed whether facio-cervical characteristics are suitable for predicting OSA. Thus, it is necessary to evaluate the relationship between facio-cervical characteristics and OSA.

During the past two decades, machine learning models have provided simple but effective approaches for improving diagnostic accuracy.<sup>13</sup> Support vector model (SVM) is a well-known classification technique and has achieved great success in bioinformatics applications. Thus, the study aimed to build a new model via SVM and monitor its effectiveness in screening OSA.

## METHODS

### Study design

Participants with suspected OSA (snoring, witnessed apnea, or excessive daytime sleepiness, etc.) were enrolled in the study from Ruijin Hospital, Shanghai Jiao Tong University School of Medicine between February 2019 and August 2020. All participants underwent anthropometric measurements and subsequent overnight polysomnography (PSG). Participants were grouped according to their AHI gain into the following: 1) no or mild OSA (subjects without moderate-to-severe OSA: AHI <15 events·h<sup>-1</sup>), 2) moderate or severe OSA (moderate to severe OSA: AHI ≥ 15 events·h<sup>-1</sup>). Exclusion criteria: (1) Patients showing complications with severe respiratory diseases, such as severe COPD, interstitial lung disease or acute asthma; (2) Patients showing complications with serious cardiovascular diseases such as acute myocardial infarction, acute heart failure or chronic congestive heart failure (Grade III and IV); (3) Patients with mental illnesses who could not cooperate with the examination; (4) Patients who receiving non-invasive positive pressure ventilation therapy; (5) Patients who might had other sleep disorders under clinical evaluation. For proper set-up of the machine learning model, all participants were randomly partitioned into a training set and a testing set according to a ratio of 7:3. The study was approved by the Ethics Committee of Shanghai Jiao Tong University School of Medicine at Ruijin Hospital (Protocol #2018-107). Written informed consent was obtained from all participants. Patients or the public were not involved in the design, or conduct, or reporting, or dissemination plans of our research.

### Clinical characteristics and anthropometric measurements

Age, sex, height, weight, BMI, neck circumference (NC), waist circumference (WC), Epworth Sleepiness Scale (ESS), and STOP-BANG questionnaire were recorded. The STOP-BANG questionnaire is a scoring model consisting of eight questions and its scores are based on Yes/No answers (score: 1/0). The eight questions included snoring, tiredness, observed apnea and high blood pressure, BMI, age, neck circumference and gender. Facio-cervical measurements including Mallampati score, MID, TMD, and TSD were measured. The Mallampati score was evaluated when participants were asked to sit upright and open their mouths as wide as possible. In grade I, the entire

1  
2  
3 uvula, faucial pillar, and soft palate are visible. In grade II, part of the uvula and palate are visible. In  
4  
5 grade III, the soft palate is visible, but the uvula is obscured.<sup>14</sup> MID was recorded by asking the  
6  
7 participant to sit upright and open the mouth as wide as possible.<sup>15</sup> The TMD was measured as the  
8  
9 straight distance between the thyroid notch and the lower border of the mental prominence, while the  
10  
11 head was fully extended, and the mouth closed.<sup>16</sup> TSD was measured as the distance between the  
12  
13 thyroid notch and the upper border of the sternum. The distance was rounded to the nearest 0.5 cm.  
14  
15 The ratios of height to TMD (H/TMD) and height to TSD (H/TSD) were calculated.<sup>16</sup>

## 17 **PSG**

18  
19 All participants underwent overnight PSG. No coffee, tea, caffeine-containing products, or sedative-  
20  
21 hypnotics were taken before sleep. The PSG monitoring included electroencephalography,  
22  
23 electrooculography, chin electromyography, electrocardiography, measurements of thoracic and  
24  
25 abdominal movements, and airflow pressure and thermistor (Alice 5, Philips Respironics, USA), with  
26  
27 the addition of oxygen saturation (Nonin, Herrsching, Germany). Sleep recordings were scored  
28  
29 according to the American Academy of Sleep Medicine (AASM) 2007 criteria.<sup>17</sup> The diagnosis of  
30  
31 moderate or severe OSA was defined by the presence of an obstructive  $AHI \geq 15$  events  $\cdot h^{-1}$  according  
32  
33 to AASM guidelines.

## 34 **Statistical analysis**

35  
36 Differences in variables between moderate or severe OSA and no or mild OSA were assessed using t-  
37  
38 test or chi-square test. Variables with  $p < 0.05$  were chosen as covariates to set up the machine-learning  
39  
40 model. The effectiveness of covariates were further evaluated by crude odds ratios (ORs) and adjusted OR  
41  
42 by controlling for BMI. Statistical analysis was conducted using IBM SPSS software (version 24.0,  
43  
44 IL, USA).

## 45 **Model construction via SVM**

46  
47 SVM is a representative machine-learning algorithm for classification, which could be viewed as a  
48  
49 nonlinear regression model. We used the SVM to capture the potential hyperplane that maximises the  
50  
51 margin between moderate or severe OSA and no or mild OSA. The SVM has the following format:

$$52 \quad C = \sum_{i=1}^n \alpha_i k(x_i, x) + b$$

1  
2  
3 Where  $c$  is the output of the model based on the new data  $x$ , which could be regarded as the classifier  
4 (0 or 1),  $x_i$  ( $i=1, \dots, n$ ) is the training dataset,  $\alpha_i$  and  $b$  are parameters determined by the algorithm.<sup>18</sup>

5  
6 We used the Gaussian radial basis function as the kernel function, with  $\gamma$  of 0.23 and the box  
7  
8 constraint set to 20. Based on the results of the statistical analysis, sex, age, NC, WC, BMI, MID, and  
9  
10 H/TSD were set as independent variables ( $p < 0.05$ ). We performed a significant principal component  
11  
12 taking in to account the strong collinearity among parameters, such as BMI and WC. Five principal  
13  
14 components were selected according to the accumulative variance contribution more than 90% and  
15  
16 scree plot.<sup>19</sup>

17  
18 The SVM model, namely SABIHC, i.e., sex, age, BMI, MID, H/TSD, NC, and WC (2 Cs) was  
19  
20 estimated by the training dataset ( $n=337$ , 70%); this model was then applied to predict OSA in the  
21  
22 testing dataset ( $n=144$ , 30%). The flow chart including screening, randomisation and algorithm is  
23  
24 presented in Figure 1.  
25  
26

27  
28 The screening performance was assessed by means of sensitivity, specificity, and area under the curve  
29  
30 (AUC), negative likelihood ratio (-LR) and positive likelihood ratio (+LR) and accuracy. Visual  
31  
32 optimal hyperplanes for the Support Vector Machine are shown in Figure 2. Finally, we compared the  
33  
34 difference in predictive power between the STOP-BANG questionnaire and the SVM model.  
35  
36

37  
38 Analyses were performed using the Scikit-learn package (0.20.3) based on Python (3.5.1).  
39  
40  
41  
42  
43  
44  
45  
46  
47  
48  
49  
50  
51  
52  
53  
54  
55  
56  
57  
58  
59  
60



**Table 1** Subject demographics, crude, and adjusted associations between morphometric variables and moderate-severe OSA.

|                             | All patients<br>(n=481) | AHI<15<br>(n=171) | AHI≥15<br>(n=310) | p-value* | crude OR (95% CI) #             | p-value‡           | adjusted OR for BMI<br>(95% CI) # | p-value‡           |
|-----------------------------|-------------------------|-------------------|-------------------|----------|---------------------------------|--------------------|-----------------------------------|--------------------|
| General characteristics     |                         |                   |                   |          |                                 |                    |                                   |                    |
| Male (%)                    | 325(67.6%)              | 93(54.39%)        | 232(74.84%)       | <0.001   | 0.401(0.270-0.595)              | <0.001             | 0.463(0.308-0.697)                | <0.001             |
| Age                         | 47.32±12.94             | 44.05±13.80       | 49.11±12.08       | <0.001   | 1.032(1.016-1.048)              | <0.001             | 1.037(1.021-1.054)                | <0.001             |
| NC                          | 39.05±4.17              | 37.63±3.74        | 39.83±4.20        | <0.001   | 1.146(1.090-1.205)              | <0.001             | 1.121(0.054-1.193)                | <0.001             |
| WC                          | 94.97±11.32             | 90.58±11.93       | 97.39±10.20       | <0.001   | 1.109(1.041-1.081)              | <0.001             | 1.074(1.041-1.107)                | <0.001             |
| BMI                         | 26.26±4.16              | 25.18±4.16        | 26.85±4.04        | <0.001   | 1.109(1.056-1.166)              | <0.001             | N/A                               | N/A                |
| Facio-cervical measurements |                         |                   |                   |          |                                 |                    |                                   |                    |
| MID                         | 4.88±0.88               | 4.76±0.79         | 4.94±0.92         | 0.028    | 1.275(1.025-1.585)              | 0.029              | 1.298(1.037-1.626)                | 0.023              |
| Mallampati test=1           | 195(40.5%)              | 77(45.02%)        | 118(38.06%)       |          | N/A                             | N/A                | N/A                               | N/A                |
| Mallampati test=2           | 142(29.5%)              | 54(31.58%)        | 88(28.39%)        | 0.12     | 0.589(0.371-0.938) <sup>†</sup> | 0.026 <sup>†</sup> | 0.679(0.421-1.095) <sup>†</sup>   | 0.113 <sup>†</sup> |
| Mallampati test=3           | 144(29.9%)              | 40(23.40%)        | 104(33.55%)       |          | 0.627(0.381-1.031) <sup>†</sup> | 0.066 <sup>†</sup> | 0.713(0.428-1.186) <sup>†</sup>   | 0.192 <sup>†</sup> |
| H/TMD                       | 18.98±2.75              | 18.69±2.30        | 19.14±2.95        | 0.085    | 1.064(0.991-1.142)              | 0.086              | 1.071(0.998-1.150)                | 0.057              |
| H/TSD                       | 18.92±2.97              | 17.49±2.06        | 19.70±3.10        | <0.001   | 1.448(1.311-1.599)              | <0.001             | 1.458(1.417-1.614)                | <0.001             |

Data are presented as mean± SD or n (%). \*: t test or chi-square test as appropriate. ‡: logistic regression. #: Odds ratios are depicted for moderate or severe OSA relative to no or mild OSA. N/A: not applicable. †: Odds ratios of Mallampati test are depicted for Mallampati test=2 (or 3) relative to Mallampati test=1.

Abbreviation: NC; neck circumference; WC: waist circumference; BMI: body mass index; MID: maximum interincisal distance; H/TMD: ratio of height to thyromegaly distance; H/TSD: ratio of height to thyro-sternum distance.

## RESULTS

A total of 512 participants were recruited for the study at first, among which 31 patients were excluded due to short total sleep time (<200 min, 13 cases) or missing data (18 cases). Finally, 481 participants (325 males and 156 females; aged between 14-77 y) were enrolled in our study (Figure 1). The participants were divided into no or mild OSA (AHI<15 events·h<sup>-1</sup>, n=171, mean AHI 7.01 ± 4.47 events·h<sup>-1</sup>) and moderate or severe OSA (AHI≥15 events·h<sup>-1</sup>, n=310, mean AHI 42.4 ± 20.7 events·h<sup>-1</sup>). Increased BMI, NC, WC, older age, and higher percentage of males were found in moderate or severe OSA (*p*<0.001). Meanwhile, they had higher MAI (32.5 ± 13.2 vs 16.4 ± 8.3) and lower LSpO<sub>2</sub> (72.1 ± 13.3 vs 87.13 ± 6.3) than no or mild OSA (*p*<0.001) (Table 1).

### Associations Between Facio-cervical Characteristics and OSA

Greater MID (4.94 vs 4.76, *p*=0.028) and H/TSD (19.70 vs 17.49, *p*<0.001) were found in moderate or severe group compared to no or mild OSA. MID (OR=1.275, adjusted OR=1.298) and H/TSD (OR=1.448, adjusted OR=1.458) are association to moderate-severe OSA, even after controlling for BMI. No significant inter-group differences were found in Mallampati test scores and H/TMD (*p*>0.05) (Table 1).

### Set-up and Predictive Accuracy of the SABIHC2 model

Age, sex, NC, WC, BMI, and facio-cervical measurements (MID, H/TSD) were chosen as covariates because a significant difference was found between the two groups. Of all participants, 337 patients (70%) were randomised to the training dataset and 144 patients (30%) were randomised to the testing dataset. We set up the SABIHC2 model based on training dataset (n=337), whose name refers to sex, age, BMI, MID, H/TSD, NC, and WC (2 Cs). The AUC was 0.829 (95% CI, 0.777 to 0.880), with a sensitivity of 0.930 and specificity of 0.727. Corresponding LR+ and LR- were 3.407 and 0.096, respectively (Table 2, Figure 3A). Then, the model was verified using the testing dataset (n=144) to screen moderate-severe OSA. The AUC was 0.787 (95% CI, 0.702 to 0.872), with a sensitivity of 0.874 and specificity of 0.700. Corresponding LR+ and LR- were 2.913 and 0.180, respectively (Table 2, Figure 3A).

The accuracy of SABIHC2 model based on all patients was 0.881, of which 0.928 for moderate or severe group (blue dots in purple area; Figure 2), and 0.719 for no or mild OSA (green dots in green area; Figure 2).

**Table 2** Performance of SABIHC2 model

|           |                  | Sensitivity | Specificity | AUC   | 95% CI      | +LR   | -LR   |
|-----------|------------------|-------------|-------------|-------|-------------|-------|-------|
| SABIHC2   | training dataset | 0.930       | 0.727       | 0.829 | 0.777-0.880 | 3.407 | 0.096 |
|           | testing dataset  | 0.874       | 0.700       | 0.787 | 0.702-0.872 | 2.913 | 0.180 |
| STOP-BANG | testing dataset  | 0.684       | 0.500       | 0.597 | 0.499-0.694 | 0.632 | 1.368 |

Abbreviations: SABIHC2 = Sex-age-BMI-MID-H/TSD-NC-WC. +LR: positive likelihood ratio; -LR: negative likelihood ratio

### **Discriminative Ability of the SABIHC2 model and STOP-BANG questionnaire**

To compare the predictive ability between the SABIHC2 model and STOP-BANG questionnaire, we calculated the ROC curve of STOP-BANG for moderate-severe OSA on the testing dataset. The AUC based on testing dataset was 0.597 (95% CI, 0.499 to 0.694), with a sensitivity of 0.684 and specificity of 0.500. (Table 2, Figure 3A).

As the STOP-BANG questions are based on the symptoms and comorbidities and may results in missed diagnoses, we further compared whether there are differences in the predictive capacity of SABIHC2 model and STOP-BANG questionnaire both for the symptomatic ( $ESS \geq 10$ ) and asymptomatic patients ( $ESS < 10$ ) within the testing dataset. For asymptomatic patients, the SABIHC2 model demonstrated better predictive ability than STOP-BANG questionnaire [AUC (0.810 vs. 0.571)], with sensitivity (0.910 vs. 0.404), and specificity (0.709 vs. 0.788). Similarly, SABIHC2 model had higher predictive power than STOP-BANG questionnaire in patients experiencing sleepiness ( $ESS \geq 10$ ) [AUC (0.762 vs. 0.606)], with sensitivity (0.830 vs. 0.813), and specificity (0.699 vs. 0.478) (Figure 3B).

## **DISCUSSION**

1  
2  
3 In the current study, we measured a broad range of anthropometric variables and assessed the  
4 association with moderate-severe OSA. Sex, age, BMI, MID, H/TSD, NC, and WC were significant  
5 determining factors. We also developed the SABIHC2 predictive model, which provides a simple and  
6 accurately assessment of moderate-severe OSA.  
7  
8  
9

10  
11  
12 Facio-cervical measurements are essential factors related to OSA. The majority of previous studies  
13 focused on the soft tissue of the upper airway. A significant correlation between the oropharyngeal  
14 soft tissue (Mallampati test and tonsillar enlargement, etc.) and AHI was reported.<sup>20,21</sup> However,  
15 Mallampati test was not a significant parameter in our study. It is possible that the association  
16 between soft tissue and OSA is weak in Asian populations.<sup>11</sup> No previous studies explored the  
17 relationship between moderate-severe OSA and facio-cervical measurements, such as MID, H/TMD,  
18 and H/TSD, which have been frequently used to evaluate difficult intubation. Herein, we found that  
19 MID and H/TSD were strongly associated with moderate-severe OSA, and H/TSD showed a  
20 significant correlation with moderate-severe OSA, even controlling for BMI. The result may suggest  
21 that H/TSD is a potential factor for moderate-severe OSA in Chinese subjects.  
22  
23  
24

25  
26  
27 As indicated previously, the overall scarcity and labour- and financially-onerous nature of PSG has  
28 prompted exploration of other suitable screening approaches, ranging from questionnaires to  
29 simplified multichannel recording. The STOP-BANG is one of the most widely used questionnaires.  
30 Some limitations of the STOP-BANG questionnaire should be considered. Firstly, it is based on  
31 simplified categories (0 or 1) and this might reduce its screening accuracy.<sup>22</sup> Secondly, the evaluation  
32 is based on symptoms and comorbidities, which may lead to omission of diagnosis for snorers without  
33 significant daytime sleepiness or hypertension.<sup>23</sup> Thus, we developed a new screening tool based on  
34 facio-cervical measurements by machine learning.  
35  
36  
37

38  
39  
40 Considering non-linear relationships and data interaction effects,<sup>24</sup> the machine learning algorithm  
41 (SVM) was used to find the complex linkages between variables. Distinct from previous machine  
42 learning models which were based on age, sex, NC, WC, and BMI,<sup>25,26</sup> we included the structural  
43 facio-cervical measurements to construct the SABIHC2 model. This showed much better performance  
44 than the STOP-BANG in screening for OSA.  
45  
46  
47  
48  
49  
50  
51  
52  
53  
54  
55  
56  
57  
58  
59  
60

1  
2  
3 The results confirmed that the SABIHC2 model performed better than the STOP-BANG  
4 questionnaire in predicting moderate-severe OSA, especially for asymptomatic patients (ESS < 10),  
5 which prompted that it may be particularly useful for this cohort of patient. As most models work, we  
6 are planning to develop a software or application in the future, to allow health care worker friendly  
7 installation and application.  
8  
9

10  
11  
12  
13 To our knowledge, this is the first study examining the predictive power of facio-cervical  
14 measurements, which may become a new index to predict OSA besides sex, age, and BMI. However,  
15 several limitations should be mentioned. First, the study cohort was based on Chinese population. The  
16 results obtained are hard to generalise for other populations. Second, the cross-sectional design of the  
17 study makes it difficult to establish the causal relationship between variables. Third, sample size was  
18 relatively small, and it was a single-centre study, which may affect the validation of the machine-  
19 learning algorithm model.  
20  
21  
22  
23  
24  
25  
26  
27

28 In conclusion, we confirmed that facio-cervical measurements are association to moderate-severe  
29 OSA. The machine learning model called the SABIHC2 model was set up based on facio-cervical and  
30 anthropometric measurements. The model is more effective than the STOP-BANG questionnaire in  
31 predicting moderate-severe OSA, especially for those without significant daytime symptoms.  
32  
33  
34  
35  
36  
37  
38  
39  
40  
41  
42  
43  
44  
45  
46  
47  
48  
49  
50  
51  
52  
53  
54  
55  
56  
57  
58  
59  
60

## REFERENCES

1. Benjafield AV, Ayas NT, Eastwood PR, et al. Estimation of the global prevalence and burden of obstructive sleep apnoea: a literature-based analysis. *Lancet Respir Med*. 2019;7(8):687-698.
2. Young T, Evans L, Finn L, et al. Estimation of the clinically diagnosed proportion of sleep apnea syndrome in middle-aged men and women. *Sleep*. 1997;20(9):705-706.
3. Kaw R, Pasupuleti V, Walker E, et al. Postoperative complications in patients with obstructive sleep apnea. *Chest*. 2012; 141: 436-41.
4. Chan MTV, Wang CY, Seet E, et al. Postoperative Vascular Complications in Unrecognized Obstructive Sleep Apnea (POSA) Study Investigators. Association of Unrecognized Obstructive Sleep Apnea With Postoperative Cardiovascular Events in Patients Undergoing Major Noncardiac Surgery. *JAMA*. 2019 May 14;321(18):1788-1798.
5. Singh M, Liao P, Kobah S, et al. Proportion of surgical patients with undiagnosed obstructive sleep apnoea. *Br J Anaesth*. 2013 Apr;110(4):629-36.
6. American Society of Anesthesiologists Task Force on Perioperative Management of patients with obstructive sleep apnea. Practice guidelines for the perioperative management of patients with obstructive sleep apnea: an updated report by the American Society of Anesthesiologists Task Force on Perioperative Management of patients with obstructive sleep apnea. *Anesthesiology*. 2014;120(2):268-286. Available: <https://pubmed.ncbi.nlm.nih.gov/24346178/>
7. Dalesio NM, Hendrix CW, McMichael DH, et al. Effects of Obesity and Leptin Deficiency on Morphine Pharmacokinetics in a Mouse Model. *Anesth Analg*. 2016 Dec;123(6):1611-1617.
8. Kee K, Dixon J, Shaw J, et al. Comparison of Commonly Used Questionnaires to Identify Obstructive Sleep Apnea in a High-Risk Population. *J Clin Sleep Med*. 2018; 14: 2057-64.
9. Lévy P, Kohler M, McNicholas WT, et al. Obstructive sleep apnoea syndrome. *Nat Rev Dis Primers*. 2015;7(1):15015.
10. Sutherland K, Lee RW, Cistulli PA. Obesity and craniofacial structure as risk factors for obstructive sleep apnoea: impact of ethnicity. *Respirology*. 2012; 17: 213-22.
11. Schorr F, Kayamori F, Hirata RP, et al. Different Craniofacial Characteristics Predict Upper Airway Collapsibility in Japanese-Brazilian and White Men. *Chest*. 2016; 149: 737-46.

- 1  
2  
3 12.Roth D, Pace NL, Lee A, et al. Airway physical examination tests for detection of difficult airway  
4 management in apparently normal adult patients. *Cochrane Database Syst Rev* 2018; 5: CD008874.  
5 Available: [http:// doi:10.1111/ijn.12805](http://doi:10.1111/ijn.12805)  
6  
7  
8  
9 13.Obermeyer Z, Emanuel EJ. Predicting the Future - Big Data, Machine Learning, and Clinical  
10 Medicine. *N Engl J Med* 2016; 375: 1216-9.  
11  
12  
13 14.Menon SM, Sampangiramaiah S, Mathew M. Cross Sectional Observational Study Performed to  
14 See for Relation of Mallampati Score and Extended Mallampati Score with Body Mass Index. *J Clin*  
15 *Diagn Res* 2017; 11: Ug01-ug03.  
16  
17  
18 15.Den Herder C, Schmeck J, Appelboom DJ, et al. Risks of general anaesthesia in people with  
19 obstructive sleep apnoea. *BMJ* 2004; 329: 955-9.  
20  
21  
22  
23 16.Schmitt HJ, Kirmse M, Radespiel-Troger M. Ratio of patient's height to thyromental distance  
24 improves prediction of difficult laryngoscopy. *Anaesth Intensive Care*. 2002; 30: 763-5.  
25  
26  
27 17.The Report of an American Academy of Sleep Medicine Task Force. Sleep-related breathing  
28 disorders in adults: recommendations for syndrome definition and measurement techniques in clinical  
29 research. *Sleep*. 1999; 22: 667-89.  
30  
31  
32  
33 18.Liu WT, Wu HT, Juang JN, et al Prediction of the severity of obstructive sleep apnea by  
34 anthropometric features via support vector machine. *PLoS ONE*. 2017; 12: e0176991.  
35  
36  
37 19. Björklund M. Be careful with your principal components. *Evolution*. 2019 Oct;73(10):2151-2158.  
38  
39  
40 20.Schellenberg JB, Maislin G, Schwab RJ. Physical findings and the risk for obstructive sleep apnea.  
41 The importance of oropharyngeal structures. *Am J Respir Crit Care Med*. 2000; 162: 740-8.  
42  
43  
44 21.Schwab RJ, Leinwand SE, Bearn CB, et al. Digital Morphometrics: A New Upper Airway  
45 Phenotyping Paradigm in OSA. *Chest* 2017; 152: 330-42.  
46  
47  
48 22.Chung F, Abdullah HR, Liao P. STOP-BANG Questionnaire: A Practical Approach to Screen for  
49 Obstructive Sleep Apnea. *Chest*. 2016;149(3):631-638.  
50  
51  
52 23.Ye L, Pien GW, Ratcliffe SJ, et al. The different clinical faces of obstructive sleep apnoea: a  
53 cluster analysis. *Eur Respir J*. 2014; 44:1600-7.  
54  
55  
56  
57  
58  
59  
60

- 1  
2  
3 24.Linnen DT, Escobar GJ, Hu X, et al. Statistical Modeling and Aggregate-Weighted Scoring  
4 Systems in Prediction of Mortality and ICU Transfer: A Systematic Review. *J Hosp Med.* 2019;  
5 14:161–9.  
6  
7  
8  
9 25.Mencar C, Gallo C, Mantero M, et al. Application of machine learning to predict obstructive sleep  
10 apnea syndrome severity. *Health Informatics J.* 2019;1460458218824725. Available: [http://](http://doi:10.1177/1460458218824725)  
11 [doi:10.1177/1460458218824725](http://doi:10.1177/1460458218824725)  
12  
13  
14  
15 26.Bozkurt S, Bostanci A, Turhan M. Can Statistical Machine Learning Algorithms Help for  
16 Classification of Obstructive Sleep Apnea Severity to Optimal Utilization of Polysomnography  
17 Resources? *Methods Inf Med.* 2017; 56:308–18.  
18  
19  
20  
21  
22  
23

#### 24 **Author affiliations**

25  
26 <sup>1</sup>Department of Respiratory and Critical Care Medicine, Ruijin Hospital, Shanghai Jiao Tong  
27 University School of Medicine, Shanghai 200025, China  
28

29 <sup>2</sup>Institute of Respiratory Medicine, Shanghai Jiao Tong University School of Medicine, Shanghai  
30 200025, China  
31  
32  
33

34 **Acknowledgements** The authors thank Peizhe Liu for his assistance with the SVM algorithm.  
35

36 **Author contributions** Liu Zhang and Ya Ru Yan drafted the manuscript, had full access to all the  
37 data, and takes responsibility for the integrity of the data and the accuracy of the data analysis. Shi Qi  
38 Li contributed to data analysis and interpretation. Qing Yun Li and Shi Qi Li contributed to study  
39 conception and design. Hong Peng Li, Ying Ni Lin, Ning Li, Xian Wen Sun, Yong Jie Ding  
40 contributed to data collection, critical revision. Chuan Xiang Li and Qing Yun Li contributed to final  
41 approval of the manuscript.  
42  
43  
44  
45  
46  
47  
48

49 **Funding** This work was supported by grants from National Key R&D Program of China  
50 (2018YFC1311900) and the National Natural Science Foundation of China (funding no. 81770084,  
51 81700084, 81570082). No conflicts of interest are to be reported  
52  
53  
54

55 **Competing interests** None declared.  
56

57 **Patient and Public Involvement statement** Patients or the public were not involved in the design, or  
58 conduct, or reporting, or dissemination plans of our research  
59  
60



**Ethics approval** The study was approved by the ethics committee of the Shanghai Jiao Tong University School of Medicine at Ruijin Hospital, with the following reference number: 2018-107.

**Data availability statement** Data are available upon reasonable request.

#### FIGURE LEGENDS:

**Figure 1.** Flow chart showing screening, randomisation and algorithm.

481 participants were enrolled in our study after excluding 31 patients. Age, sex, NC, WC, BMI, and facio-cervical measurements (MID, H/TSD) were potential factors related to OSA due to the significant difference between the two groups ( $p < 0.05$ ). We chose the following parameters to setup the SABIHC2 model based on training dataset, whose name refers to *sex*, *age*, *BMI*, *MID*, *H/TSD*, *NC*, and *WC (2 Cs)*. Then, the model was verified on testing dataset.

Abbreviations: BMI: body mass index; MID: maximum interincisal distance; H/TMD: ratio of height to thyromegaly distance; H/TSD: ratio of height to thyro-sternum distance; NC: neck circumference; WC: waist circumference;

**Figure 2.** Optimal hyperplane for Support Vector Machine (SVM). The green area means the SVM predicting  $AHI < 15$  events·h<sup>-1</sup>, the purple means the SVM predicts the  $AHI \geq 15$  events·h<sup>-1</sup>. Green dots represent no or mild OSA ( $AHI < 15$  events·h<sup>-1</sup>), blue dots represent moderate or severe OSA ( $AHI \geq 15$  events·h<sup>-1</sup>). The accuracy of SABIHC2 model based on all patients was 0.881, of which 0.928 for moderate or severe OSA (blue dots in purple area), and 0.719 for no or mild OSA (green dots in green area). The boundary was obtained from the SVM classifier and the figure was created using Python.

Abbreviations: SVM: support vector machine; SABIHC2 model: *sex*, *age*, *BMI*, *MID*, *H/TSD*, *NC*, and *WC (2 Cs)*.

**Figure 3.** ROC curve of SABIHC2 model and STOP-BANG.

**A:** The ROC curve of SABIHC2 model and STOP-BANG. The AUC of the SABIHC2 model based on the training database ( $n=337$ , 70.1%, brown line) was 0.829 (95% CI, 0.777 to 0.880), with a sensitivity of 0.930 and specificity of 0.727. About testing database ( $n=144$  29.9%, red line), the AUC was 0.787 (95% CI, 0.702 to 0.872), with a sensitivity of 0.874 and specificity of 0.700, respectively.

1  
2  
3 The ROC curve of STOP-BANG questionnaire (blue line) on the testing database was 0.597 (95% CI,  
4 0.499 to 0.694). STOP-BANG>2 showed the sensitivity and specificity of 0.832 and 0.220,  
5  
6 respectively, while STOP-BANG>4 with the sensitivity of 0.495 and specificity of 0.780.  
7  
8

9 Brown: SVM based on training dataset; red: SVM based on testing dataset; blue: STOP-BANG based  
10 on testing dataset.  
11  
12

13 **B:** The ROC curve of SABIHC2 model and STOP-BANG based on asymptomatic patients (ESS <  
14 10) and sleepiness patients (ESS  $\geq$  10). In asymptomatic patients, SABIHC2 model (red line)  
15 remarkably demonstrated better predictive ability than STOP-BANG questionnaire (dark blue line),  
16 (0.910 vs. 0.404), and specificity (0.709 vs. 0.788) and AUC (0.810 vs. 0.571). Similarly, SABIHC2  
17 model (orange line) had higher predictive power than STOP-BANG questionnaire (soft blue line) in  
18 sleepiness patients (ESS  $\geq$  10), with sensitivity (0.830 vs. 0.813), and specificity (0.699 vs. 0.478) and  
19 AUC (0.762 vs. 0.606).  
20  
21  
22  
23  
24  
25  
26  
27

28 Abbreviations: AUC: the area under ROC curve; SVM: support vector machine; CIs: confidence  
29 intervals.  
30  
31  
32  
33  
34  
35  
36  
37  
38  
39  
40  
41  
42  
43  
44  
45  
46  
47  
48  
49  
50  
51  
52  
53  
54  
55  
56  
57  
58  
59  
60

1  
2  
3  
4  
5  
6  
7  
8  
9  
10  
11  
12  
13  
14  
15  
16  
17  
18  
19  
20  
21  
22  
23  
24  
25  
26  
27  
28  
29  
30  
31  
32  
33  
34  
35  
36  
37  
38  
39  
40  
41  
42  
43  
44  
45  
46  
47  
48  
49  
50  
51  
52  
53  
54  
55  
56  
57  
58  
59  
60

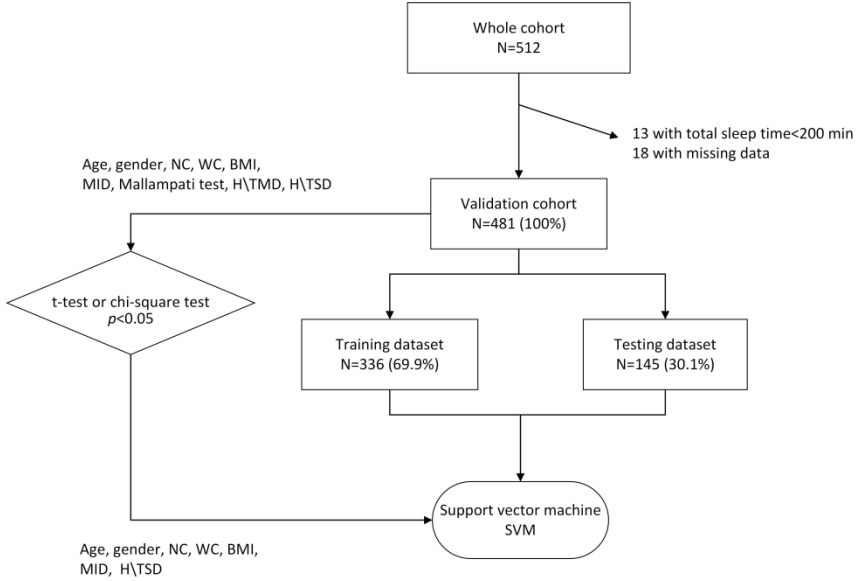

482x281mm (300 x 300 DPI)

1  
2  
3  
4  
5  
6  
7  
8  
9  
10  
11  
12  
13  
14  
15  
16  
17  
18  
19  
20  
21  
22  
23  
24  
25  
26  
27  
28  
29  
30  
31  
32  
33  
34  
35  
36  
37  
38  
39  
40  
41  
42  
43  
44  
45  
46  
47  
48  
49  
50  
51  
52  
53  
54  
55  
56  
57  
58  
59  
60

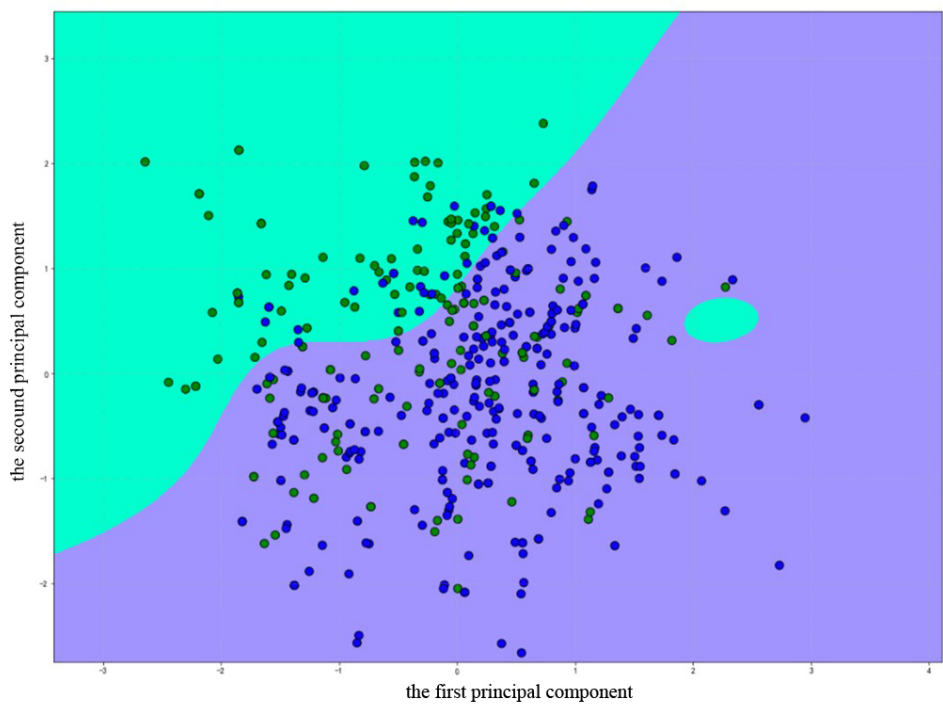

90x65mm (300 x 300 DPI)

1  
2  
3  
4  
5  
6  
7  
8  
9  
10  
11  
12  
13  
14  
15  
16  
17  
18  
19  
20  
21  
22  
23  
24  
25  
26  
27  
28  
29  
30  
31  
32  
33  
34  
35  
36  
37  
38  
39  
40  
41  
42  
43  
44  
45  
46  
47  
48  
49  
50  
51  
52  
53  
54  
55  
56  
57  
58  
59  
60

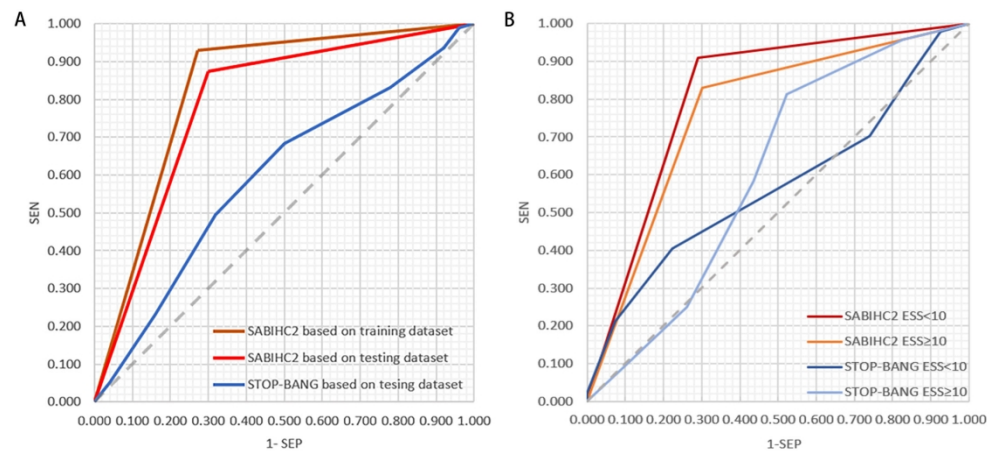

189x90mm (300 x 300 DPI)

| Section & Topic          | No         | Item                                                                                                                                                   |
|--------------------------|------------|--------------------------------------------------------------------------------------------------------------------------------------------------------|
| <b>TITLE OR ABSTRACT</b> |            |                                                                                                                                                        |
|                          | <b>1</b>   | Identification as a study of diagnostic accuracy using at least one measure of accuracy (such as sensitivity, specificity, predictive values, or AUC)  |
| <b>ABSTRACT</b>          |            |                                                                                                                                                        |
|                          | <b>2</b>   | Structured summary of study design, methods, results, and conclusions (for specific guidance, see STARD for Abstracts)                                 |
| <b>INTRODUCTION</b>      |            |                                                                                                                                                        |
|                          | <b>3</b>   | Scientific and clinical background, including the intended use and clinical role of the index test                                                     |
|                          | <b>4</b>   | Study objectives and hypotheses                                                                                                                        |
| <b>METHODS</b>           |            |                                                                                                                                                        |
| <i>Study design</i>      | <b>5</b>   | Whether data collection was planned before the index test and reference standard were performed (prospective study) or after (retrospective study)     |
| <i>Participants</i>      | <b>6</b>   | Eligibility criteria                                                                                                                                   |
|                          | <b>7</b>   | On what basis potentially eligible participants were identified (such as symptoms, results from previous tests, inclusion in registry)                 |
|                          | <b>8</b>   | Where and when potentially eligible participants were identified (setting, location and dates)                                                         |
|                          | <b>9</b>   | Whether participants formed a consecutive, random or convenience series                                                                                |
| <i>Test methods</i>      | <b>10a</b> | Index test, in sufficient detail to allow replication                                                                                                  |
|                          | <b>10b</b> | Reference standard, in sufficient detail to allow replication                                                                                          |
|                          | <b>11</b>  | Rationale for choosing the reference standard (if alternatives exist)                                                                                  |
|                          | <b>12a</b> | Definition of and rationale for test positivity cut-offs or result categories of the index test, distinguishing pre-specified from exploratory         |
|                          | <b>12b</b> | Definition of and rationale for test positivity cut-offs or result categories of the reference standard, distinguishing pre-specified from exploratory |
|                          | <b>13a</b> | Whether clinical information and reference standard results were available to the performers/readers of the index test                                 |
|                          | <b>13b</b> | Whether clinical information and index test results were available to the assessors of the reference standard                                          |
| <i>Analysis</i>          | <b>14</b>  | Methods for estimating or comparing measures of diagnostic accuracy                                                                                    |
|                          | <b>15</b>  | How indeterminate index test or reference standard results were handled                                                                                |
|                          | <b>16</b>  | How missing data on the index test and reference standard were handled                                                                                 |
|                          | <b>17</b>  | Any analyses of variability in diagnostic accuracy, distinguishing pre-specified from exploratory                                                      |
|                          | <b>18</b>  | Intended sample size and how it was determined                                                                                                         |
| <b>RESULTS</b>           |            |                                                                                                                                                        |
| <i>Participants</i>      | <b>19</b>  | Flow of participants, using a diagram                                                                                                                  |
|                          | <b>20</b>  | Baseline demographic and clinical characteristics of participants                                                                                      |
|                          | <b>21a</b> | Distribution of severity of disease in those with the target condition                                                                                 |
|                          | <b>21b</b> | Distribution of alternative diagnoses in those without the target condition                                                                            |
|                          | <b>22</b>  | Time interval and any clinical interventions between index test and reference standard                                                                 |
| <i>Test results</i>      | <b>23</b>  | Cross tabulation of the index test results (or their distribution) by the results of the reference standard                                            |
|                          | <b>24</b>  | Estimates of diagnostic accuracy and their precision (such as 95% confidence intervals)                                                                |
|                          | <b>25</b>  | Any adverse events from performing the index test or the reference standard                                                                            |
| <b>DISCUSSION</b>        |            |                                                                                                                                                        |
|                          | <b>26</b>  | Study limitations, including sources of potential bias, statistical uncertainty, and generalisability                                                  |
|                          | <b>27</b>  | Implications for practice, including the intended use and clinical role of the index test                                                              |
| <b>OTHER INFORMATION</b> |            |                                                                                                                                                        |
|                          | <b>28</b>  | Registration number and name of registry                                                                                                               |
|                          | <b>29</b>  | Where the full study protocol can be accessed                                                                                                          |
|                          | <b>30</b>  | Sources of funding and other support; role of funders                                                                                                  |

# STARD 2015

---

## AIM

STARD stands for “Standards for Reporting Diagnostic accuracy studies”. This list of items was developed to contribute to the completeness and transparency of reporting of diagnostic accuracy studies. Authors can use the list to write informative study reports. Editors and peer-reviewers can use it to evaluate whether the information has been included in manuscripts submitted for publication.

---

## EXPLANATION

A **diagnostic accuracy study** evaluates the ability of one or more medical tests to correctly classify study participants as having a **target condition**. This can be a disease, a disease stage, response or benefit from therapy, or an event or condition in the future. A medical test can be an imaging procedure, a laboratory test, elements from history and physical examination, a combination of these, or any other method for collecting information about the current health status of a patient.

The test whose accuracy is evaluated is called **index test**. A study can evaluate the accuracy of one or more index tests. Evaluating the ability of a medical test to correctly classify patients is typically done by comparing the distribution of the index test results with those of the **reference standard**. The reference standard is the best available method for establishing the presence or absence of the target condition. An accuracy study can rely on one or more reference standards.

If test results are categorized as either positive or negative, the cross tabulation of the index test results against those of the reference standard can be used to estimate the **sensitivity** of the index test (the proportion of participants *with* the target condition who have a positive index test), and its **specificity** (the proportion *without* the target condition who have a negative index test). From this cross tabulation (sometimes referred to as the contingency or “2x2” table), several other accuracy statistics can be estimated, such as the positive and negative **predictive values** of the test. Confidence intervals around estimates of accuracy can then be calculated to quantify the statistical **precision** of the measurements.

If the index test results can take more than two values, categorization of test results as positive or negative requires a **test positivity cut-off**. When multiple such cut-offs can be defined, authors can report a receiver operating characteristic (ROC) curve which graphically represents the combination of sensitivity and specificity for each possible test positivity cut-off. The **area under the ROC curve** informs in a single numerical value about the overall diagnostic accuracy of the index test.

The **intended use** of a medical test can be diagnosis, screening, staging, monitoring, surveillance, prediction or prognosis. The **clinical role** of a test explains its position relative to existing tests in the clinical pathway. A replacement test, for example, replaces an existing test. A triage test is used before an existing test; an add-on test is used after an existing test.

Besides diagnostic accuracy, several other outcomes and statistics may be relevant in the evaluation of medical tests. Medical tests can also be used to classify patients for purposes other than diagnosis, such as staging or prognosis. The STARD list was not explicitly developed for these other outcomes, statistics, and study types, although most STARD items would still apply.

---

## DEVELOPMENT

This STARD list was released in 2015. The 30 items were identified by an international expert group of methodologists, researchers, and editors. The guiding principle in the development of STARD was to select items that, when reported, would help readers to judge the potential for bias in the study, to appraise the applicability of the study findings and the validity of conclusions and recommendations. The list represents an update of the first version, which was published in 2003.

More information can be found on <http://www.equator-network.org/reporting-guidelines/stard>.

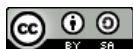

# BMJ Open

## Moderate-Severe OSA Screening Based on the Machine Learning Model of the Chinese Population Facio-cervical Measurements Dataset

|                               |                                                                                                                                                                                                                                                                                                                                                                                                                                                                                                                                                                                                                                                                                                                                                                                                                                                                                                                                                                                                                                                                                                                                                                                                                                                                                                                                                                                                                                                                                                                                                                                                                                                                                                                                                                                                                                                                                                                                                                                                                                                                                                                                                                                                                                                                                                                                                                                                                                                                                                                                                                                                                  |
|-------------------------------|------------------------------------------------------------------------------------------------------------------------------------------------------------------------------------------------------------------------------------------------------------------------------------------------------------------------------------------------------------------------------------------------------------------------------------------------------------------------------------------------------------------------------------------------------------------------------------------------------------------------------------------------------------------------------------------------------------------------------------------------------------------------------------------------------------------------------------------------------------------------------------------------------------------------------------------------------------------------------------------------------------------------------------------------------------------------------------------------------------------------------------------------------------------------------------------------------------------------------------------------------------------------------------------------------------------------------------------------------------------------------------------------------------------------------------------------------------------------------------------------------------------------------------------------------------------------------------------------------------------------------------------------------------------------------------------------------------------------------------------------------------------------------------------------------------------------------------------------------------------------------------------------------------------------------------------------------------------------------------------------------------------------------------------------------------------------------------------------------------------------------------------------------------------------------------------------------------------------------------------------------------------------------------------------------------------------------------------------------------------------------------------------------------------------------------------------------------------------------------------------------------------------------------------------------------------------------------------------------------------|
| Journal:                      | <i>BMJ Open</i>                                                                                                                                                                                                                                                                                                                                                                                                                                                                                                                                                                                                                                                                                                                                                                                                                                                                                                                                                                                                                                                                                                                                                                                                                                                                                                                                                                                                                                                                                                                                                                                                                                                                                                                                                                                                                                                                                                                                                                                                                                                                                                                                                                                                                                                                                                                                                                                                                                                                                                                                                                                                  |
| Manuscript ID                 | bmjopen-2020-048482.R2                                                                                                                                                                                                                                                                                                                                                                                                                                                                                                                                                                                                                                                                                                                                                                                                                                                                                                                                                                                                                                                                                                                                                                                                                                                                                                                                                                                                                                                                                                                                                                                                                                                                                                                                                                                                                                                                                                                                                                                                                                                                                                                                                                                                                                                                                                                                                                                                                                                                                                                                                                                           |
| Article Type:                 | Original research                                                                                                                                                                                                                                                                                                                                                                                                                                                                                                                                                                                                                                                                                                                                                                                                                                                                                                                                                                                                                                                                                                                                                                                                                                                                                                                                                                                                                                                                                                                                                                                                                                                                                                                                                                                                                                                                                                                                                                                                                                                                                                                                                                                                                                                                                                                                                                                                                                                                                                                                                                                                |
| Date Submitted by the Author: | 21-Jul-2021                                                                                                                                                                                                                                                                                                                                                                                                                                                                                                                                                                                                                                                                                                                                                                                                                                                                                                                                                                                                                                                                                                                                                                                                                                                                                                                                                                                                                                                                                                                                                                                                                                                                                                                                                                                                                                                                                                                                                                                                                                                                                                                                                                                                                                                                                                                                                                                                                                                                                                                                                                                                      |
| Complete List of Authors:     | <p>zhang, liu; Shanghai Jiao Tong University Medical School Affiliated Ruijin Hospital, Department of Respiratory and Critical Care Medicine; Shanghai Jiao Tong University Medical School Affiliated Ruijin Hospital, Institute of Respiratory Medicine</p> <p>Yan, Ya Ru; Shanghai Jiao Tong University Medical School Affiliated Ruijin Hospital, Department of Respiratory and Critical Care Medicine; Shanghai Jiao Tong University Medical School Affiliated Ruijin Hospital, Institute of Respiratory Medicine</p> <p>Li, Shi Qi; Shanghai Jiao Tong University Medical School Affiliated Ruijin Hospital, Department of Respiratory and Critical Care Medicine; Shanghai Jiao Tong University Medical School Affiliated Ruijin Hospital, Institute of Respiratory Medicine</p> <p>Li, Hong Peng; Shanghai Jiao Tong University Medical School Affiliated Ruijin Hospital, Department of Respiratory and Critical Care Medicine; Shanghai Jiao Tong University Medical School Affiliated Ruijin Hospital, Institute of Respiratory Medicine</p> <p>Lin, Ying Ni; Shanghai Jiao Tong University Medical School Affiliated Ruijin Hospital, Department of Respiratory and Critical Care Medicine; Shanghai Jiao Tong University Medical School Affiliated Ruijin Hospital, Institute of Respiratory Medicine</p> <p>Li, Ning; Shanghai Jiao Tong University Medical School Affiliated Ruijin Hospital, Department of Respiratory and Critical Care Medicine; Shanghai Jiao Tong University Medical School Affiliated Ruijin Hospital, Institute of Respiratory Medicine</p> <p>Sun, Xian Wen; Shanghai Jiao Tong University Medical School Affiliated Ruijin Hospital, Department of Respiratory and Critical Care Medicine; Shanghai Jiao Tong University Medical School Affiliated Ruijin Hospital, Institute of Respiratory Medicine</p> <p>Ding, Yong Jie; Shanghai Jiao Tong University Medical School Affiliated Ruijin Hospital, Department of Respiratory and Critical Care Medicine; Shanghai Jiao Tong University Medical School Affiliated Ruijin Hospital, Institute of Respiratory Medicine</p> <p>Li, Chuan Xiang; Shanghai Jiao Tong University Medical School Affiliated Ruijin Hospital, Department of Respiratory and Critical Care Medicine; Shanghai Jiao Tong University Medical School Affiliated Ruijin Hospital, Institute of Respiratory Medicine</p> <p>Li, Qing Yun; Shanghai Jiao Tong University Medical School Affiliated Ruijin Hospital, Department of Respiratory and Critical Care Medicine; Shanghai Jiao Tong University Medical School Affiliated Ruijin Hospital,</p> |



1  
2  
3  
4  
5  
6  
7  
8  
9  
10  
11  
12  
13  
14  
15  
16  
17  
18  
19  
20  
21  
22  
23  
24  
25  
26  
27  
28  
29  
30  
31  
32  
33  
34  
35  
36  
37  
38  
39  
40  
41  
42  
43  
44  
45  
46  
47  
48  
49  
50  
51  
52  
53  
54  
55  
56  
57  
58  
59  
60

|                                    |                                                                 |
|------------------------------------|-----------------------------------------------------------------|
|                                    | Institute of Respiratory Medicine                               |
| <b>Primary Subject Heading</b> :   | Respiratory medicine                                            |
| <b>Secondary Subject Heading</b> : | Respiratory medicine                                            |
| <b>Keywords</b> :                  | PUBLIC HEALTH, SLEEP MEDICINE, Adult anaesthesia < ANAESTHETICS |
|                                    |                                                                 |

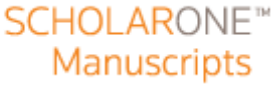



I, the Submitting Author has the right to grant and does grant on behalf of all authors of the Work (as defined in the below author licence), an exclusive licence and/or a non-exclusive licence for contributions from authors who are: i) UK Crown employees; ii) where BMJ has agreed a CC-BY licence shall apply, and/or iii) in accordance with the terms applicable for US Federal Government officers or employees acting as part of their official duties; on a worldwide, perpetual, irrevocable, royalty-free basis to BMJ Publishing Group Ltd ("BMJ") its licensees and where the relevant Journal is co-owned by BMJ to the co-owners of the Journal, to publish the Work in this journal and any other BMJ products and to exploit all rights, as set out in our [licence](#).

The Submitting Author accepts and understands that any supply made under these terms is made by BMJ to the Submitting Author unless you are acting as an employee on behalf of your employer or a postgraduate student of an affiliated institution which is paying any applicable article publishing charge ("APC") for Open Access articles. Where the Submitting Author wishes to make the Work available on an Open Access basis (and intends to pay the relevant APC), the terms of reuse of such Open Access shall be governed by a Creative Commons licence – details of these licences and which [Creative Commons](#) licence will apply to this Work are set out in our licence referred to above.

Other than as permitted in any relevant BMJ Author's Self Archiving Policies, I confirm this Work has not been accepted for publication elsewhere, is not being considered for publication elsewhere and does not duplicate material already published. I confirm all authors consent to publication of this Work and authorise the granting of this licence.

1  
2  
3 **Moderate-Severe OSA Screening Based on the Machine Learning Model of the Chinese**  
4  
5 **Population Facio-cervical Measurements Dataset**  
6  
7

8  
9 Liu Zhang\*<sup>1,2</sup>, Ya Ru Yan\*<sup>1,2</sup>, Shi Qi Li \*<sup>1,2</sup>, Hong Peng Li <sup>1,2</sup>, Ying Ni Lin <sup>1,2</sup>, Ning Li <sup>1,2</sup>, Xian Wen  
10 Sun <sup>1,2</sup>, Yong Jie Ding<sup>1,2</sup>, Chuan Xiang Li<sup>1,2</sup>, Qing Yun Li<sup>1,2</sup>  
11

12  
13 <sup>1</sup>Department of Respiratory and Critical Care Medicine, Shanghai Jiao Tong University Medical  
14 School Affiliated Ruijin Hospital, Shanghai 200025, China  
15

16  
17 <sup>2</sup>Institute of Respiratory Medicine, Shanghai Jiao Tong University Medical School Affiliated Ruijin  
18 Hospital, Shanghai 200025, China  
19

20  
21  
22 \* co-first authors  
23

24  
25  
26 **Corresponding author full contact details:**  
27

28 Name: Qing Yun Li, M.D, Ph.D.

29  
30 Address: Department of Respiratory and Critical Care Medicine, Shanghai Jiao Tong University  
31 Medical School Affiliated Ruijin Hospital, Shanghai 200025, China  
32

33 Post code: 200025  
34

35 City: Shanghai  
36

37 Country: China  
38

39 Email: [liqingyun68@hotmail.com](mailto:liqingyun68@hotmail.com)  
40

41 All authors have seen and approved the manuscript  
42

43  
44 Financial support: This work was supported by grants from National Key R&D Program of China  
45 (2018YFC1311900) and the National Natural Science Foundation of China (founding no. 81770084,  
46 81700084, 81570082).  
47  
48  
49

50 No conflicts of interest are to be reported.  
51  
52  
53  
54  
55  
56  
57  
58  
59  
60

**ABSTRACT:**

**Objectives** Obstructive sleep apnea (OSA) has received much attention as a risk factor for perioperative complications and 68.5% of OSA patients remain undiagnosed before surgery. Facio-cervical characteristics may screen OSA for Asians due to smaller upper airways compared to Caucasians. Thus, our study aimed to explore a machine-learning model to screen moderate-severe OSA based on facio-cervical and anthropometric measurements.

**Design** A cross-sectional study.

**Setting** Data were collected from the Shanghai Jiao Tong University School of Medicine affiliated Ruijin Hospital between February 2019 and August 2020.

**Participants** A total of 481 Chinese participants were included in the study.

**Primary and secondary outcome** (1) Identification of moderate-severe OSA with apnea-hypopnea index (AHI)15 events·h<sup>-1</sup>. (2) Verification of the machine learning model.

**Results** The SABIHC2 model (*Sex-Age-Body mass index-maximum Interincisal distance-ratio of Height to thyro-sternum distance-neck Circumference-waist Circumference*) was set up. The SABIHC2 model could screen moderate-severe OSA with an area under the curve (AUC)=0.832, the sensitivity of 0.916, and specificity of 0.749, and performed better than the STOP-BANG questionnaire, which showed AUC=0.631, the sensitivity of 0.487, and specificity of 0.772. Especially for asymptomatic patients (ESS < 10), the SABIHC2 model demonstrated better predictive ability compared to the STOP-BANG questionnaire, with AUC (0.824 vs. 0.530), sensitivity (0.892 vs. 0.348), and specificity (0.755 vs. 0.809).

**Conclusion** The SABIHC2 machine learning model provides a simple and accurate assessment of moderate-severe OSA in the Chinese population, especially for those without significant daytime sleepiness.

**Keywords:** obstructive sleep apnea, machine learning, anthropometric, screening

### Strengths and limitations of this study

- This is the first study to assess the screening value of facio-cervical measurements in predicting moderate-severe OSA.
- Support vector model, a well-known machine learning method, was used to set up the model to screen moderate-severe OSA in the Chinese population.
- Instead of most questionnaires based on symptoms and comorbidities, the SABIHC2 model which is entirely based on measurements, avoids the confounding effect of symptoms and comorbidities.
- The cross-sectional design of the study makes it difficult to establish the causal relationship between variables.
- The study is a single-centre study with a relatively small sample size, and further confirmation with large-sample, multi-centre, prospective clinical trial is needed in the future.

## INTRODUCTION

Obstructive sleep apnea (OSA) is a common breathing sleep disorder that affects about 936 million adults globally,<sup>1</sup> of which about 80% are estimated to be undiagnosed.<sup>2</sup> In the Chinese population, approximately 175 million adults have mild to severe obstructive sleep apnea, of whom about 65 million adults have moderate-severe obstructive sleep apnea.<sup>1</sup> In addition to cardiovascular injury and metabolic syndrome, OSA has recently been regarded as a risk factor for perioperative complications, including hypoxaemia, pneumonia, pulmonary embolism, unplanned transfer to the intensive care unit, and even death, especially for those who received abdominal or vascular surgery.<sup>3</sup> The rates of postoperative cardiovascular events show a rise in moderate-severe OSA (25.1%) compared to no or mild OSA(16.8%).<sup>4</sup> 38% of surgical patients had moderate-severe OSA, of which 68.5% were not diagnosed before surgery.<sup>5</sup> Guidelines have been recommended to develop a local protocol for screening possible OSA patients before elective surgery.<sup>6,7</sup> The most common screening scales, including STOP-BANG, Berlin questionnaire, and OSA50, are mainly based on symptoms and comorbidities,<sup>8</sup> which might lead to missed diagnoses for those without significant daytime sleepiness.

Several factors contribute to the pathogenesis of OSA, including obesity, facio-cervical anatomy, and alteration in pharyngeal muscle function, etc.<sup>9</sup> Asians have relatively smaller upper airways compared to Caucasians.<sup>10</sup> Only in Asians, smaller upper airways are predictors of upper airway collapsibility, and an anatomic imbalance between tongue and mandible volume influenced upper airway collapsibility among Caucasians.<sup>11</sup> The above evidence prompts facio-cervical characteristics that may predict OSA for Asians, such as thyromental distance (TMD), thyro-sternum distance (TSD), maximum interincisal distance (MID), and Mallampati test score, which have been widely used in predicting difficult intubation.<sup>12</sup> However, no studies assessed whether facio-cervical characteristics are suitable for predicting OSA. Thus, it is necessary to evaluate the relationship between facio-cervical characteristics and OSA.

During the past two decades, machine learning models have provided simple but effective approaches for improving diagnostic accuracy.<sup>13</sup> Support vector model (SVM) is a well-known classification

1  
2  
3 technique and has achieved great success in bioinformatics applications. Thus, the study aimed to  
4  
5 build a new model via SVM and monitor its effectiveness in screening OSA.  
6  
7  
8

## 9 **METHODS**

### 10 **Study design**

11  
12 Participants with suspected OSA (snoring, witnessed apnea, or excessive daytime sleepiness, etc.)  
13  
14 were enrolled in the study from Ruijin Hospital, Shanghai Jiao Tong University School of Medicine  
15  
16 between February 2019 and August 2020. All participants underwent anthropometric measurements  
17  
18 and subsequent overnight polysomnography (PSG). Participants were grouped according to their AHI  
19  
20 gain into the following: 1) no or mild OSA (subjects without moderate-to-severe OSA: AHI <15  
21  
22 events·h<sup>-1</sup>), 2) moderate-severe OSA (moderate to severe OSA: AHI ≥ 15 events·h<sup>-1</sup>). Exclusion  
23  
24 criteria: (1) Patients showing complications with severe respiratory diseases, such as severe COPD,  
25  
26 interstitial lung disease, or acute asthma; (2) Patients showing complications with serious  
27  
28 cardiovascular diseases such as acute myocardial infarction, acute heart failure, or chronic congestive  
29  
30 heart failure (Grade III and IV); (3) Patients with mental illnesses who could not cooperate with the  
31  
32 examination; (4) Patients who receiving non-invasive positive pressure ventilation therapy; (5)  
33  
34 Patients who might have other sleep disorders under clinical evaluation.  
35  
36  
37  
38

39 The study was approved by the Ethics Committee of Shanghai Jiao Tong University School of  
40  
41 Medicine at Ruijin Hospital (Protocol #2018-107). Written informed consent was obtained from all  
42  
43 participants. Patients or the public were not involved in the design, or conduct, or reporting, or  
44  
45 dissemination plans of our research.  
46

### 47 **Clinical characteristics and anthropometric measurements**

48  
49 Age, sex, height, weight, BMI, neck circumference (NC), waist circumference (WC), Epworth  
50  
51 Sleepiness Scale (ESS), and STOP-BANG questionnaire were recorded. The STOP-BANG  
52  
53 questionnaire is a scoring model consisting of eight questions and its scores are based on Yes/No  
54  
55 answers (score: 1/0). The eight questions included snoring, tiredness, observed apnea, high blood  
56  
57 pressure, BMI, age, neck circumference, and gender. Facio-cervical measurements including  
58  
59 Mallampati score, MID, TMD, and TSD were measured. The Mallampati score was evaluated when  
60

1  
2  
3 participants were asked to sit upright and open their mouths as wide as possible. In grade I, the entire  
4 uvula, faucial pillar, and soft palate are visible. In grade II, part of the uvula and palate are visible. In  
5 grade III, the soft palate is visible, but the uvula is obscured.<sup>14</sup> MID was recorded by asking the  
6 participant to sit upright and open the mouth as wide as possible.<sup>15</sup> The TMD was measured as the  
7 straight distance between the thyroid notch and the lower border of the mental prominence, while the  
8 head was fully extended, and the mouth closed.<sup>16</sup> TSD was measured as the distance between the  
9 thyroid notch and the upper border of the sternum. The distance was rounded to the nearest 0.5 cm.  
10  
11 The ratios of height to TMD (H/TMD) and height to TSD (H/TSD) were calculated.<sup>16</sup>  
12  
13  
14  
15  
16  
17  
18  
19

## 20 **PSG**

21  
22 All participants underwent overnight PSG. No coffee, tea, caffeine-containing products, or sedative-  
23 hypnotics were taken before sleep. The PSG monitoring included electroencephalography,  
24 electrooculography, chin electromyography, electrocardiography, measurements of thoracic and  
25 abdominal movements, and airflow pressure and thermistor (Alice 5, Philips Respironics, USA), with  
26 the addition of oxygen saturation (Nonin, Hirsching, Germany). Sleep recordings were scored  
27 according to the American Academy of Sleep Medicine (AASM) 2007 criteria.<sup>17</sup> The diagnosis of  
28 moderate-severe OSA was defined by the presence of an obstructive  $AHI \geq 15$  events  $\cdot h^{-1}$  according to  
29 AASM guidelines.  
30  
31  
32  
33  
34  
35  
36  
37  
38  
39

## 40 **Statistical analysis**

41  
42 Continuous variables with a normal distribution are presented as mean  $\pm$  standard deviation, while  
43 values without a normal distribution are presented as median (25th to 75th percentiles). Categorical  
44 variables are presented as numbers and percentages. Independent samples t-test and Mann–Whitney U  
45 test were used to determine differential risk factors between the two groups. The chi-square test and  
46 Fisher's exact chi-square test were used to compare the categorical data, as appropriate. Logistic  
47 regression analyses were performed to calculate the odds ratio (OR). Receiver operating characteristic  
48 (ROC) analysis was used to determine the area under the curve (AUC) with a 95% confidence interval  
49 (CI), sensitivity, and specificity. All tests were two-sided and used a significance level of 0.05. All  
50 analyses were performed using the SPSS software (version 24.0; SPSS Inc. Chicago, IL, USA).  
51  
52  
53  
54  
55  
56  
57  
58  
59  
60



### Model construction via SVM

SVM is a representative machine-learning algorithm for classification, which could be viewed as a nonlinear regression model. We used the SVM to capture the potential hyperplane that maximises the margin between moderate or severe OSA and no or mild OSA. The SVM has the following format:

$$C = \sum_{i=1}^n \alpha_i k(x_i, x) + b$$

Where  $c$  is the output of the model based on the new data  $x$ , which could be regarded as the classifier (0 or 1),  $x_i$  ( $i=1, \dots, n$ ) is the training dataset,  $\alpha_i$  and  $b$  are parameters determined by the algorithm.<sup>18</sup>

We used the Gaussian radial basis function as the kernel function, with  $\gamma$  of 0.23 and the box constraint set to 20. Based on the results of the statistical analysis, sex, age, NC, WC, BMI, MID, and H/TSD were set as independent variables ( $p < 0.05$ ). We performed a significant principal component taking in to account the strong collinearity among parameters, such as BMI and WC. Five principal components were selected according to the accumulative variance contribution of more than 90% and scree plot.<sup>19</sup>

The performance of the SVM methods was evaluated by the ten-fold cross-validation. The participants were stratified sampling into ten subsamples: one formed the test dataset for verifying the effectiveness of the model, and the others formed the training dataset to predict moderate-severe OSA for the model. The SVM model, namely SABIHC, i.e., sex, age, BMI, MID, H/TSD, NC, and WC (2 Cs) was estimated by the training dataset and then applied to predict OSA in the testing dataset. The flow chart including screening, randomisation, and algorithm is presented in Figure 1.

The screening performance was assessed using sensitivity, specificity, area under the curve (AUC), negative likelihood ratio (-LR), positive likelihood ratio (+LR), and accuracy. Visual optimal hyperplanes for the Support Vector Machine are shown in Figure 2. Finally, we compared the difference in predictive power between the STOP-BANG questionnaire and the SVM model.

Analyses were performed using the Scikit-learn package (0.20.3) based on Python (3.5.1).

**Table 1** Subject demographics, crude, and adjusted associations between morphometric variables and moderate-severe OSA.

|                             | All patients<br>(n=481) | AHI<15<br>(n=171) | AHI≥15<br>(n=310) | p-value* | crude OR (95% CI) # | p-value‡ | adjusted OR for BMI<br>(95% CI) # | p-value‡ |
|-----------------------------|-------------------------|-------------------|-------------------|----------|---------------------|----------|-----------------------------------|----------|
| General characteristics     |                         |                   |                   |          |                     |          |                                   |          |
| Male (%)                    | 325(67.6%)              | 93(54.39%)        | 232(74.84%)       | <0.001   | 0.401(0.270-0.595)  | <0.001   | 0.463(0.308-0.697)                | <0.001   |
| Age                         | 47.32±12.94             | 44.05±13.80       | 49.11±12.08       | <0.001   | 1.032(1.016-1.048)  | <0.001   | 1.037(1.021-1.054)                | <0.001   |
| NC                          | 39.05±4.17              | 37.63±3.74        | 39.83±4.20        | <0.001   | 1.146(1.090-1.205)  | <0.001   | 1.121(0.054-1.193)                | <0.001   |
| WC                          | 94.97±11.32             | 90.58±11.93       | 97.39±10.20       | <0.001   | 1.109(1.041-1.081)  | <0.001   | 1.074(1.041-1.107)                | <0.001   |
| BMI                         | 26.26±4.16              | 25.18±4.16        | 26.85±4.04        | <0.001   | 1.109(1.056-1.166)  | <0.001   | N/A                               | N/A      |
| Facio-cervical measurements |                         |                   |                   |          |                     |          |                                   |          |
| MID                         | 4.88±0.88               | 4.76±0.79         | 4.94±0.92         | 0.028    | 1.275(1.025-1.585)  | 0.029    | 1.298(1.037-1.626)                | 0.023    |
| Mallampati test=1           | 195(40.5%)              | 77(45.02%)        | 118(38.06%)       |          | N/A                 | N/A      | N/A                               | N/A      |
| Mallampati test=2           | 142(29.5%)              | 54(31.58%)        | 88(28.39%)        | 0.12     | 0.589(0.371-0.938)† | 0.026†   | 0.679(0.421-1.095) †              | 0.113†   |
| Mallampati test=3           | 144(29.9%)              | 40(23.40%)        | 104(33.55%)       |          | 0.627(0.381-1.031)† | 0.066†   | 0.713(0.428-1.186) †              | 0.192†   |
| H/TMD                       | 18.98±2.75              | 18.69±2.30        | 19.14±2.95        | 0.085    | 1.064(0.991-1.142)  | 0.086    | 1.071(0.998-1.150)                | 0.057    |
| H/TSD                       | 18.92±2.97              | 17.49±2.06        | 19.70±3.10        | <0.001   | 1.448(1.311-1.599)  | <0.001   | 1.458(1.417-1.614)                | <0.001   |

Data are presented as mean± SD or n (%). \*: t test or chi-square test as appropriate. ‡: logistic regression. #: Odds ratios are depicted for moderate-severe OSA relative to no or mild OSA. N/A: not applicable. †: Odds ratios of Mallampati test are depicted for Mallampati test=2 (or 3) relative to Mallampati test=1.

Abbreviation: NC; neck circumference; WC: waist circumference; BMI: body mass index; MID: maximum interincisal distance; H/TMD: ratio of height to thyromegaly distance; H/TSD: ratio of height to thyro-sternum distance.

## RESULTS

A total of 512 participants were recruited for the study at first, among which 31 patients were excluded due to short total sleep time (<200 min, 13 cases) or missing data (18 cases). Finally, 481 participants (325 males and 156 females; aged between 14-77 y) were enrolled in our study (Figure 1). The participants were divided into no or mild OSA (AHI<15 events·h<sup>-1</sup>, n=171, mean AHI 7.01 ± 4.47 events·h<sup>-1</sup>) and moderate-severe OSA (AHI≥15 events·h<sup>-1</sup>, n=310, mean AHI 42.4 ± 20.7 events·h<sup>-1</sup>). Increased BMI, NC, WC, older age and a higher percentage of males were found in moderate-severe OSA (*p*<0.001). Meanwhile, they had a higher micro-arousal index (MAI) (32.5 ± 13.2 vs 16.4 ± 8.3 events·h<sup>-1</sup>) and lower lowest pulse oxygen saturation (LSpO<sub>2</sub>) (72.1 ± 13.3 vs 87.13 ± 6.3 %) than no or mild OSA (*p*<0.001) (Table 1).

### Associations Between Facio-cervical Characteristics and OSA

Greater MID (4.94 vs 4.76, *p*=0.028) and H/TSD (19.70 vs 17.49, *p*<0.001) were found in the moderate-severe group compared to no or mild OSA. MID (OR=1.275, adjusted OR=1.298) and H/TSD (OR=1.448, adjusted OR=1.458) are associated with moderate-severe OSA, even after controlling for BMI. No significant inter-group differences were found in Mallampati test scores and H/TMD (*p*>0.05) (Table 1).

### Set-up and Predictive Accuracy of the SABIHC2 model

Age, sex, NC, WC, BMI, and facio-cervical measurements (MID, H/TSD) were chosen as covariates because a significant difference was found between the two groups. We set up the SABIHC2 model, whose name refers to *sex*, *age*, *BMI*, *MID*, *H/TSD*, *NC*, and *WC* (**2 Cs**). The AUC was 0.832 (95% CI, 0.790 to 0.875), with a sensitivity of 0.916 and specificity of 0.749. Corresponding LR+ and LR- were 3.649 and 0.112, respectively (Table 2, Figure 3A). The accuracy of the SABIHC2 model was 0.857, of which 0.916 for the moderate-severe group (blue dots in the purple area; Figure 2), and 0.748 for no or mild OSA (green dots in the green area; Figure 2).

**Table 2** Performance of SABIHC2 model

|           | Sensitivity | Specificity | AUC   | 95% CI      | +LR   | -LR   |
|-----------|-------------|-------------|-------|-------------|-------|-------|
| SABIHC2   | 0.916       | 0.749       | 0.832 | 0.790-0.875 | 3.649 | 0.112 |
| STOP-BANG | 0.487       | 0.772       | 0.631 | 0.581-0.682 | 2.136 | 0.665 |

Abbreviations: SABIHC2 = Sex-age-BMI-MID-H/TSD-NC-WC. +LR: positive likelihood ratio; -LR: negative likelihood ratio

### Discriminative Ability of the SABIHC2 model and STOP-BANG questionnaire

To compare the predictive ability between the SABIHC2 model and the STOP-BANG questionnaire, we calculated the ROC curve of STOP-BANG for moderate-severe OSA. The AUC was 0.631 (95% CI, 0.581 to 0.682), with a sensitivity of 0.487 and specificity of 0.772. (Table 2, Figure 3A).

As the STOP-BANG questions are based on the symptoms and comorbidities and may result in missed diagnoses, we further compared whether there are differences in the predictive capacity of the SABIHC2 model and STOP-BANG questionnaire both for the symptomatic ( $ESS \geq 10$ ) and asymptomatic patients ( $ESS < 10$ ). For asymptomatic patients, the SABIHC2 model demonstrated better predictive ability than the STOP-BANG questionnaire, with AUC (0.824 vs. 0.530), sensitivity (0.892 vs. 0.348), and specificity (0.755 vs. 0.809). Similarly, the SABIHC2 model had higher predictive power than the STOP-BANG questionnaire in patients experiencing sleepiness ( $ESS \geq 10$ ), with AUC (0.841 vs. 0.720), sensitivity (0.941 vs. 0.632), and specificity (0.740 vs. 0.727) (Figure 3B).

### DISCUSSION

In the current study, we measured a broad range of anthropometric variables and assessed the association with moderate-severe OSA. Sex, age, BMI, MID, H/TSD, NC, and WC were significant determining factors. We also developed the SABIHC2 predictive model, which provides a simple and accurate assessment of moderate-severe OSA.

1  
2  
3 Facio-cervical measurements are essential factors related to OSA. The majority of previous studies  
4 focused on the soft tissue of the upper airway. A significant correlation between the oropharyngeal  
5 soft tissue (Mallampati test and tonsillar enlargement, etc.) and AHI was reported.<sup>20,21</sup> However, the  
6 Mallampati test was not a significant parameter in our study. It is possible that the association  
7 between soft tissue and OSA is weak in Asian populations.<sup>11</sup> No previous studies explored the  
8 relationship between moderate-severe OSA and facio-cervical measurements, such as MID, H/TMD,  
9 and H/TSD, which have been frequently used to evaluate difficult intubation. Herein, we found that  
10 MID and H/TSD were strongly associated with moderate-severe OSA, and H/TSD showed a  
11 significant correlation with moderate-severe OSA, even controlling for BMI. The result may suggest  
12 that H/TSD is a potential factor for moderate-severe OSA in Chinese subjects.

13  
14 As indicated previously, the overall scarcity and labour- and financially-onerous nature of PSG has  
15 prompted exploration of other suitable screening approaches, ranging from questionnaires to  
16 simplified multichannel recording. The STOP-BANG is one of the most widely used questionnaires.  
17 Some limitations of the STOP-BANG questionnaire should be considered. Firstly, it is based on  
18 simplified categories (0 or 1) and this might reduce its screening accuracy.<sup>22</sup> Secondly, the evaluation  
19 is based on symptoms and comorbidities, which may lead to the omission of diagnosis for snorers  
20 without significant daytime sleepiness or hypertension.<sup>23</sup> Thus, we developed a new screening tool  
21 based on facio-cervical measurements by machine learning.

22  
23 Considering non-linear relationships and data interaction effects,<sup>24</sup> the machine learning algorithm  
24 (SVM) was used to find the complex linkages between variables. Distinct from previous machine  
25 learning models which were based on age, sex, NC, WC, and BMI,<sup>25,26</sup> we included the structural  
26 facio-cervical measurements to construct the SABIHC2 model. This showed much better performance  
27 than the STOP-BANG in screening for OSA.

28  
29 The results confirmed that the SABIHC2 model performed better than the STOP-BANG  
30 questionnaire in predicting moderate-severe OSA, especially for asymptomatic patients (ESS < 10),  
31 which prompted that it may be particularly useful for this cohort of patients. As most models work,  
32 we are planning to develop a software or application in the future, to allow health care worker-  
33 friendly installation and application.

1  
2  
3 To our knowledge, this is the first study examining the predictive power of facio-cervical  
4 measurements, which may become a new index to predict OSA besides sex, age, and BMI. However,  
5 several limitations should be mentioned. First, the study cohort was based on the Chinese population.  
6  
7 The results obtained are hard to generalise for other populations. Second, the cross-sectional design of  
8  
9 the study makes it difficult to establish the causal relationship between variables. Third, the sample  
10  
11 size was relatively small, and it was a single-centre study, which may affect the validation of the  
12  
13 machine-learning algorithm model.  
14  
15  
16

17  
18 In conclusion, we confirmed that facio-cervical measurements are associated with moderate-severe  
19  
20 OSA in the Chinese population. The machine learning model called the SABIHC2 model was set up  
21  
22 based on facio-cervical and anthropometric measurements. The model is more effective than the  
23  
24 STOP-BANG questionnaire in predicting moderate-severe OSA, especially for those without  
25  
26 significant daytime symptoms.  
27  
28  
29  
30  
31  
32  
33  
34  
35  
36  
37  
38  
39  
40  
41  
42  
43  
44  
45  
46  
47  
48  
49  
50  
51  
52  
53  
54  
55  
56  
57  
58  
59  
60

**REFERENCES**

1. Benjafield AV, Ayas NT, Eastwood PR, et al. Estimation of the global prevalence and burden of obstructive sleep apnoea: a literature-based analysis. *Lancet Respir Med*. 2019;7(8):687-698.
2. Young T, Evans L, Finn L, et al. Estimation of the clinically diagnosed proportion of sleep apnea syndrome in middle-aged men and women. *Sleep*. 1997;20(9):705-706.
3. Kaw R, Pasupuleti V, Walker E, et al. Postoperative complications in patients with obstructive sleep apnea. *Chest*. 2012; 141: 436-41.
4. Chan MTV, Wang CY, Seet E, et al. Postoperative Vascular Complications in Unrecognized Obstructive Sleep Apnea (POSA) Study Investigators. Association of Unrecognized Obstructive Sleep Apnea With Postoperative Cardiovascular Events in Patients Undergoing Major Noncardiac Surgery. *JAMA*. 2019 May 14;321(18):1788-1798.
5. Singh M, Liao P, Kobah S, et al. Proportion of surgical patients with undiagnosed obstructive sleep apnoea. *Br J Anaesth*. 2013 Apr;110(4):629-36.
6. American Society of Anesthesiologists Task Force on Perioperative Management of patients with obstructive sleep apnea. Practice guidelines for the perioperative management of patients with obstructive sleep apnea: an updated report by the American Society of Anesthesiologists Task Force on Perioperative Management of patients with obstructive sleep apnea. *Anesthesiology*. 2014;120(2):268-286. Available: <https://pubmed.ncbi.nlm.nih.gov/24346178/>
7. Dalesio NM, Hendrix CW, McMichael DH, et al. Effects of Obesity and Leptin Deficiency on Morphine Pharmacokinetics in a Mouse Model. *Anesth Analg*. 2016 Dec;123(6):1611-1617.
8. Kee K, Dixon J, Shaw J, et al. Comparison of Commonly Used Questionnaires to Identify Obstructive Sleep Apnea in a High-Risk Population. *J Clin Sleep Med*. 2018; 14: 2057-64.
9. Lévy P, Kohler M, McNicholas WT, et al. Obstructive sleep apnoea syndrome. *Nat Rev Dis Primers*. 2015;7(1):15015.
10. Sutherland K, Lee RW, Cistulli PA. Obesity and craniofacial structure as risk factors for obstructive sleep apnoea: impact of ethnicity. *Respirology*. 2012; 17: 213-22.
11. Schorr F, Kayamori F, Hirata RP, et al. Different Craniofacial Characteristics Predict Upper Airway Collapsibility in Japanese-Brazilian and White Men. *Chest*. 2016; 149: 737-46.

- 1  
2  
3 12.Roth D, Pace NL, Lee A, et al. Airway physical examination tests for detection of difficult airway  
4 management in apparently normal adult patients. *Cochrane Database Syst Rev* 2018; 5: CD008874.  
5 Available: [http:// doi:10.1111/ijn.12805](http://doi:10.1111/ijn.12805)  
6  
7  
8  
9 13.Obermeyer Z, Emanuel EJ. Predicting the Future - Big Data, Machine Learning, and Clinical  
10 Medicine. *N Engl J Med* 2016; 375: 1216-9.  
11  
12  
13 14.Menon SM, Sampangiramaiah S, Mathew M. Cross Sectional Observational Study Performed to  
14 See for Relation of Mallampati Score and Extended Mallampati Score with Body Mass Index. *J Clin*  
15 *Diagn Res* 2017; 11: Ug01-ug03.  
16  
17  
18 15.Den Herder C, Schmeck J, Appelboom DJ, et al. Risks of general anaesthesia in people with  
19 obstructive sleep apnoea. *BMJ* 2004; 329: 955-9.  
20  
21  
22  
23 16.Schmitt HJ, Kirmse M, Radespiel-Troger M. Ratio of patient's height to thyromental distance  
24 improves prediction of difficult laryngoscopy. *Anaesth Intensive Care*. 2002; 30: 763-5.  
25  
26  
27 17.The Report of an American Academy of Sleep Medicine Task Force. Sleep-related breathing  
28 disorders in adults: recommendations for syndrome definition and measurement techniques in clinical  
29 research. *Sleep*. 1999; 22: 667-89.  
30  
31  
32  
33 18.Liu WT, Wu HT, Juang JN, et al Prediction of the severity of obstructive sleep apnea by  
34 anthropometric features via support vector machine. *PLoS ONE*. 2017; 12: e0176991.  
35  
36  
37  
38 19. Björklund M. Be careful with your principal components. *Evolution*. 2019 Oct;73(10):2151-2158.  
39  
40  
41 20.Schellenberg JB, Maislin G, Schwab RJ. Physical findings and the risk for obstructive sleep apnea.  
42 The importance of oropharyngeal structures. *Am J Respir Crit Care Med*. 2000; 162: 740-8.  
43  
44  
45 21.Schwab RJ, Leinwand SE, Bearn CB, et al. Digital Morphometrics: A New Upper Airway  
46 Phenotyping Paradigm in OSA. *Chest* 2017; 152: 330-42.  
47  
48  
49 22.Chung F, Abdullah HR, Liao P. STOP-BANG Questionnaire: A Practical Approach to Screen for  
50 Obstructive Sleep Apnea. *Chest*. 2016;149(3):631-638.  
51  
52  
53 23.Ye L, Pien GW, Ratcliffe SJ, et al. The different clinical faces of obstructive sleep apnoea: a  
54 cluster analysis. *Eur Respir J*. 2014; 44:1600-7.  
55  
56  
57  
58  
59  
60



- 1  
2  
3 24.Linnen DT, Escobar GJ, Hu X, et al. Statistical Modeling and Aggregate-Weighted Scoring  
4 Systems in Prediction of Mortality and ICU Transfer: A Systematic Review. *J Hosp Med.* 2019;  
5 14:161–9.  
6  
7  
8  
9 25.Mencar C, Gallo C, Mantero M, et al. Application of machine learning to predict obstructive sleep  
10 apnea syndrome severity. *Health Informatics J.* 2019;1460458218824725. Available: [http://](http://doi:10.1177/1460458218824725)  
11 [doi:10.1177/1460458218824725](http://doi:10.1177/1460458218824725)  
12  
13  
14  
15 26.Bozkurt S, Bostanci A, Turhan M. Can Statistical Machine Learning Algorithms Help for  
16 Classification of Obstructive Sleep Apnea Severity to Optimal Utilization of Polysomnography  
17 Resources? *Methods Inf Med.* 2017; 56:308–18.  
18  
19  
20  
21  
22  
23

#### 24 **Author affiliations**

25  
26 <sup>1</sup>Department of Respiratory and Critical Care Medicine, Ruijin Hospital, Shanghai Jiao Tong  
27 University School of Medicine, Shanghai 200025, China

28  
29 <sup>2</sup>Institute of Respiratory Medicine, Shanghai Jiao Tong University School of Medicine, Shanghai  
30 200025, China  
31  
32  
33

34  
35 **Acknowledgements** The authors thank Peizhe Liu for his assistance with the SVM algorithm.

36  
37 **Author contributions** Liu Zhang and Ya Ru Yan drafted the manuscript, had full access to all the  
38 data, and takes responsibility for the integrity of the data and the accuracy of the data analysis. Shi Qi  
39 Li contributed to data analysis and interpretation. Qing Yun Li and Shi Qi Li contributed to study  
40 conception and design. Hong Peng Li, Ying Ni Lin, Ning Li, Xian Wen Sun, Yong Jie Ding  
41 contributed to data collection, critical revision. Chuan Xiang Li and Qing Yun Li contributed to final  
42 approval of the manuscript.  
43  
44  
45  
46  
47  
48

49  
50 **Funding** This work was supported by grants from National Key R&D Program of China  
51 (2018YFC1311900) and the National Natural Science Foundation of China (funding no. 81770084,  
52 81700084, 81570082). No conflicts of interest are to be reported  
53  
54  
55

56 **Competing interests** None declared.

57  
58 **Patient and Public Involvement statement** Patients or the public were not involved in the design, or  
59 conduct, or reporting, or dissemination plans of our research  
60

**Ethics approval** The study was approved by the ethics committee of the Shanghai Jiao Tong University School of Medicine at Ruijin Hospital, with the following reference number: 2018-107.

**Data availability statement** Data are available upon reasonable request.

## FIGURE LEGENDS:

**Figure 1.** Flow chart showing screening, randomisation and algorithm.

481 participants were enrolled in our study after excluding 31 patients. Age, sex, NC, WC, BMI, and facio-cervical measurements (MID, H/TSD) were potential factors related to OSA due to the significant difference between the two groups ( $p < 0.05$ ). We chose the following parameters to setup the SABIHC2 model based on training dataset, whose name refers to *sex*, *age*, *BMI*, *MID*, *H/TSD*, *NC*, and *WC (2 Cs)*. Then, the model was verified on testing dataset.

Abbreviations: BMI: body mass index; MID: maximum interincisal distance; H/TMD: ratio of height to thyromegaly distance; H/TSD: ratio of height to thyro-sternum distance; NC: neck circumference; WC: waist circumference;

**Figure 2.** Optimal hyperplane for Support Vector Machine (SVM). The green area means the SVM predicting  $AHI < 15$  events $\cdot h^{-1}$ , the purple means the SVM predicts the  $AHI \geq 15$  events $\cdot h^{-1}$ . Green dots represent no or mild OSA ( $AHI < 15$  events $\cdot h^{-1}$ ), blue dots represent moderate-severe OSA ( $AHI \geq 15$  events $\cdot h^{-1}$ ). The accuracy of SABIHC2 model based on all patients was 0.881, of which 0.928 for moderate-severe OSA (blue dots in purple area), and 0.719 for no or mild OSA (green dots in green area). The boundary was obtained from the SVM classifier and the figure was created using Python.

Abbreviations: SVM: support vector machine; SABIHC2 model: *sex*, *age*, *BMI*, *MID*, *H/TSD*, *NC*, and *WC (2 Cs)*.

**Figure 3.** ROC curve of SABIHC2 model and STOP-BANG.

**A:** The ROC curve of SABIHC2 model and STOP-BANG. The AUC of the SABIHC2 model based on the training database ( $n=337$ , 70.1%, brown line) was 0.829 (95% CI, 0.777 to 0.880), with a sensitivity of 0.930 and specificity of 0.727. About testing database ( $n=144$  29.9%, red line), the AUC

1  
2  
3 was 0.787 (95% CI, 0.702 to 0.872), with a sensitivity of 0.874 and specificity of 0.700, respectively.

4  
5 The ROC curve of STOP-BANG questionnaire (blue line) on the testing database was 0.597 (95% CI,  
6  
7 0.499 to 0.694). STOP-BANG>2 showed the sensitivity and specificity of 0.832 and 0.220,  
8  
9 respectively, while STOP-BANG>4 with the sensitivity of 0.495 and specificity of 0.780.

10  
11 Brown: SVM based on training dataset; red: SVM based on testing dataset; blue: STOP-BANG based  
12  
13 on testing dataset.

14  
15 **B:** The ROC curve of SABIHC2 model and STOP-BANG based on asymptomatic patients (ESS <  
16  
17 10) and sleepiness patients (ESS ≥ 10). In asymptomatic patients, SABIHC2 model (red line)  
18  
19 remarkably demonstrated better predictive ability than STOP-BANG questionnaire (dark blue line),  
20  
21 with AUC (0.810 vs. 0.571), sensitivity (0.910 vs. 0.404), and specificity (0.709 vs. 0.788). Similarly,  
22  
23 SABIHC2 model (orange line) had higher predictive power than STOP-BANG questionnaire (soft  
24  
25 blue line) in sleepiness patients (ESS ≥ 10), with sensitivity (0.830 vs. 0.813), and specificity (0.699  
26  
27 vs. 0.478) and AUC (0.762 vs. 0.606).

28  
29  
30 Abbreviations: AUC: the area under ROC curve; SVM: support vector machine; CIs: confidence  
31  
32 intervals.  
33  
34  
35  
36  
37  
38  
39  
40  
41  
42  
43  
44  
45  
46  
47  
48  
49  
50  
51  
52  
53  
54  
55  
56  
57  
58  
59  
60

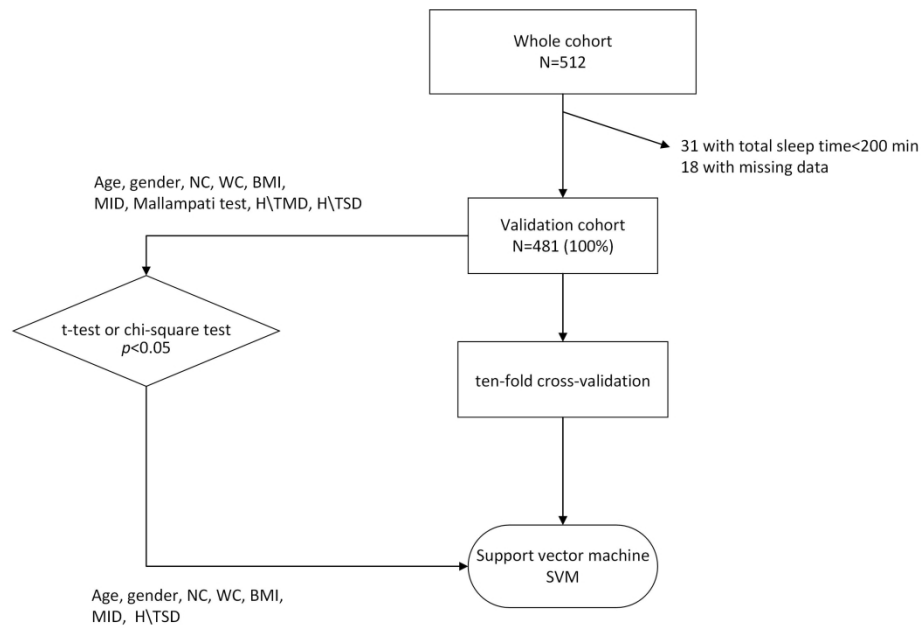

279x175mm (300 x 300 DPI)

1  
2  
3  
4  
5  
6  
7  
8  
9  
10  
11  
12  
13  
14  
15  
16  
17  
18  
19  
20  
21  
22  
23  
24  
25  
26  
27  
28  
29  
30  
31  
32  
33  
34  
35  
36  
37  
38  
39  
40  
41  
42  
43  
44  
45  
46  
47  
48  
49  
50  
51  
52  
53  
54  
55  
56  
57  
58  
59  
60

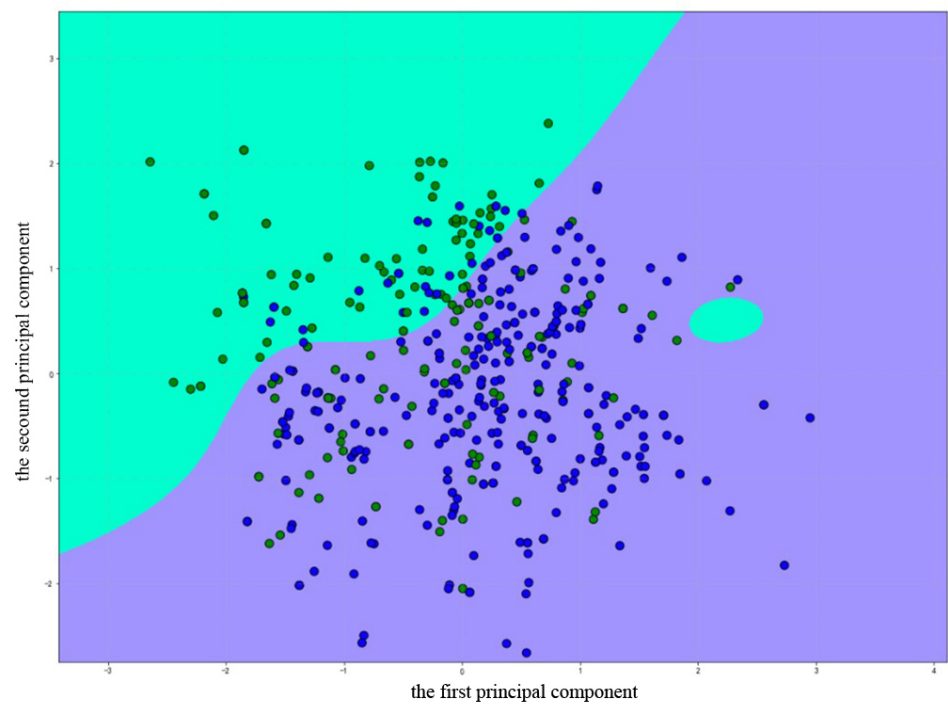

90x65mm (300 x 300 DPI)

1  
2  
3  
4  
5  
6  
7  
8  
9  
10  
11  
12  
13  
14  
15  
16  
17  
18  
19  
20  
21  
22  
23  
24  
25  
26  
27  
28  
29  
30  
31  
32  
33  
34  
35  
36  
37  
38  
39  
40  
41  
42  
43  
44  
45  
46  
47  
48  
49  
50  
51  
52  
53  
54  
55  
56  
57  
58  
59  
60

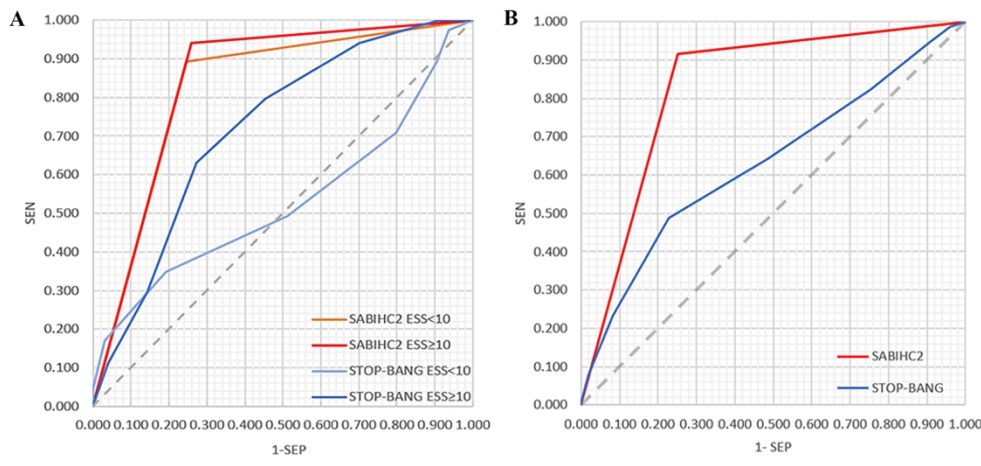

189x89mm (300 x 300 DPI)

| Section & Topic          | No  | Item                                                                                                                                                   | Reported on page # |
|--------------------------|-----|--------------------------------------------------------------------------------------------------------------------------------------------------------|--------------------|
| <b>TITLE OR ABSTRACT</b> |     |                                                                                                                                                        |                    |
|                          | 1   | Identification as a study of diagnostic accuracy using at least one measure of accuracy (such as sensitivity, specificity, predictive values, or AUC)  | Page 2             |
| <b>ABSTRACT</b>          |     |                                                                                                                                                        |                    |
|                          | 2   | Structured summary of study design, methods, results, and conclusions (for specific guidance, see STARD for Abstracts)                                 | Page 2             |
| <b>INTRODUCTION</b>      |     |                                                                                                                                                        |                    |
|                          | 3   | Scientific and clinical background, including the intended use and clinical role of the index test                                                     | Page 4             |
|                          | 4   | Study objectives and hypotheses                                                                                                                        | Page 4             |
| <b>METHODS</b>           |     |                                                                                                                                                        |                    |
| <i>Study design</i>      | 5   | Whether data collection was planned before the index test and reference standard were performed (prospective study) or after (retrospective study)     | Not applicable     |
| <i>Participants</i>      | 6   | Eligibility criteria                                                                                                                                   | Page 5             |
|                          | 7   | On what basis potentially eligible participants were identified (such as symptoms, results from previous tests, inclusion in registry)                 | Page 5             |
|                          | 8   | Where and when potentially eligible participants were identified (setting, location and dates)                                                         | Page 5             |
|                          | 9   | Whether participants formed a consecutive, random or convenience series                                                                                | Page 5             |
| <i>Test methods</i>      | 10a | Index test, in sufficient detail to allow replication                                                                                                  | Page 5, 6          |
|                          | 10b | Reference standard, in sufficient detail to allow replication                                                                                          | Page 5, 6          |
|                          | 11  | Rationale for choosing the reference standard (if alternatives exist)                                                                                  | Page 4, 5          |
|                          | 12a | Definition of and rationale for test positivity cut-offs or result categories of the index test, distinguishing pre-specified from exploratory         | Not applicable     |
|                          | 12b | Definition of and rationale for test positivity cut-offs or result categories of the reference standard, distinguishing pre-specified from exploratory | Page 4, 5          |
|                          | 13a | Whether clinical information and reference standard results were available to the performers/readers of the index test                                 | No                 |
|                          | 13b | Whether clinical information and index test results were available to the assessors of the reference standard                                          | Yes                |
| <i>Analysis</i>          | 14  | Methods for estimating or comparing measures of diagnostic accuracy                                                                                    | Not applicable     |
|                          | 15  | How indeterminate index test or reference standard results were handled                                                                                | Not applicable     |
|                          | 16  | How missing data on the index test and reference standard were handled                                                                                 | Page 9             |
|                          | 17  | Any analyses of variability in diagnostic accuracy, distinguishing pre-specified from exploratory                                                      | Page 6             |
|                          | 18  | Intended sample size and how it was determined                                                                                                         | Not applicable     |
| <b>RESULTS</b>           |     |                                                                                                                                                        |                    |
| <i>Participants</i>      | 19  | Flow of participants, using a diagram                                                                                                                  | Figure 1           |
|                          | 20  | Baseline demographic and clinical characteristics of participants                                                                                      | Page 8, Table 1    |
|                          | 21a | Distribution of severity of disease in those with the target condition                                                                                 | Page 8             |
|                          | 21b | Distribution of alternative diagnoses in those without the target condition                                                                            | Not applicable     |
|                          | 22  | Time interval and any clinical interventions between index test and reference standard                                                                 | Not applicable     |
| <i>Test results</i>      | 23  | Cross tabulation of the index test results (or their distribution) by the results of the reference standard                                            | Page 9             |
|                          | 24  | Estimates of diagnostic accuracy and their precision (such as 95% confidence intervals)                                                                | Page 8, 9, 10      |
|                          | 25  | Any adverse events from performing the index test or the reference standard                                                                            | Not applicable     |
| <b>DISCUSSION</b>        |     |                                                                                                                                                        |                    |
|                          | 26  | Study limitations, including sources of potential bias, statistical uncertainty, and generalisability                                                  | Page 12            |
|                          | 27  | Implications for practice, including the intended use and clinical role of the index test                                                              | Page 12            |
| <b>OTHER INFORMATION</b> |     |                                                                                                                                                        |                    |
|                          | 28  | Registration number and name of registry                                                                                                               | Page 16            |
|                          | 29  | Where the full study protocol can be accessed                                                                                                          | Page 16            |
|                          | 30  | Sources of funding and other support; role of funders                                                                                                  | Page 15            |

# STARD 2015

---

## AIM

STARD stands for “Standards for Reporting Diagnostic accuracy studies”. This list of items was developed to contribute to the completeness and transparency of reporting of diagnostic accuracy studies. Authors can use the list to write informative study reports. Editors and peer-reviewers can use it to evaluate whether the information has been included in manuscripts submitted for publication.

---

## EXPLANATION

A **diagnostic accuracy study** evaluates the ability of one or more medical tests to correctly classify study participants as having a **target condition**. This can be a disease, a disease stage, response or benefit from therapy, or an event or condition in the future. A medical test can be an imaging procedure, a laboratory test, elements from history and physical examination, a combination of these, or any other method for collecting information about the current health status of a patient.

The test whose accuracy is evaluated is called **index test**. A study can evaluate the accuracy of one or more index tests. Evaluating the ability of a medical test to correctly classify patients is typically done by comparing the distribution of the index test results with those of the **reference standard**. The reference standard is the best available method for establishing the presence or absence of the target condition. An accuracy study can rely on one or more reference standards.

If test results are categorized as either positive or negative, the cross tabulation of the index test results against those of the reference standard can be used to estimate the **sensitivity** of the index test (the proportion of participants *with* the target condition who have a positive index test), and its **specificity** (the proportion *without* the target condition who have a negative index test). From this cross tabulation (sometimes referred to as the contingency or “2x2” table), several other accuracy statistics can be estimated, such as the positive and negative **predictive values** of the test. Confidence intervals around estimates of accuracy can then be calculated to quantify the statistical **precision** of the measurements.

If the index test results can take more than two values, categorization of test results as positive or negative requires a **test positivity cut-off**. When multiple such cut-offs can be defined, authors can report a receiver operating characteristic (ROC) curve which graphically represents the combination of sensitivity and specificity for each possible test positivity cut-off. The **area under the ROC curve** informs in a single numerical value about the overall diagnostic accuracy of the index test.

The **intended use** of a medical test can be diagnosis, screening, staging, monitoring, surveillance, prediction or prognosis. The **clinical role** of a test explains its position relative to existing tests in the clinical pathway. A replacement test, for example, replaces an existing test. A triage test is used before an existing test; an add-on test is used after an existing test.

Besides diagnostic accuracy, several other outcomes and statistics may be relevant in the evaluation of medical tests. Medical tests can also be used to classify patients for purposes other than diagnosis, such as staging or prognosis. The STARD list was not explicitly developed for these other outcomes, statistics, and study types, although most STARD items would still apply.

---

## DEVELOPMENT

This STARD list was released in 2015. The 30 items were identified by an international expert group of methodologists, researchers, and editors. The guiding principle in the development of STARD was to select items that, when reported, would help readers to judge the potential for bias in the study, to appraise the applicability of the study findings and the validity of conclusions and recommendations. The list represents an update of the first version, which was published in 2003.

More information can be found on <http://www.equator-network.org/reporting-guidelines/stard>.

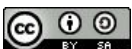



# BMJ Open

## Moderate-severe OSA screening based on support vector machine of the Chinese population facio-cervical measurements dataset: a cross-sectional study

|                               |                                                                                                                                                                                                                                                                                                                                                                                                                                                                                                                                                                                                                                                                                                                                                                                                                                                                                                                                                                                                                                                                                                                                                                                                                                                                                                                                                                                                                                                                                                                                                                                                                                                                                                                                                                                                                                                                                                                                                                                                                                                                                                                                                                                                                                                                                                                                                                                                              |
|-------------------------------|--------------------------------------------------------------------------------------------------------------------------------------------------------------------------------------------------------------------------------------------------------------------------------------------------------------------------------------------------------------------------------------------------------------------------------------------------------------------------------------------------------------------------------------------------------------------------------------------------------------------------------------------------------------------------------------------------------------------------------------------------------------------------------------------------------------------------------------------------------------------------------------------------------------------------------------------------------------------------------------------------------------------------------------------------------------------------------------------------------------------------------------------------------------------------------------------------------------------------------------------------------------------------------------------------------------------------------------------------------------------------------------------------------------------------------------------------------------------------------------------------------------------------------------------------------------------------------------------------------------------------------------------------------------------------------------------------------------------------------------------------------------------------------------------------------------------------------------------------------------------------------------------------------------------------------------------------------------------------------------------------------------------------------------------------------------------------------------------------------------------------------------------------------------------------------------------------------------------------------------------------------------------------------------------------------------------------------------------------------------------------------------------------------------|
| Journal:                      | <i>BMJ Open</i>                                                                                                                                                                                                                                                                                                                                                                                                                                                                                                                                                                                                                                                                                                                                                                                                                                                                                                                                                                                                                                                                                                                                                                                                                                                                                                                                                                                                                                                                                                                                                                                                                                                                                                                                                                                                                                                                                                                                                                                                                                                                                                                                                                                                                                                                                                                                                                                              |
| Manuscript ID                 | bmjopen-2020-048482.R3                                                                                                                                                                                                                                                                                                                                                                                                                                                                                                                                                                                                                                                                                                                                                                                                                                                                                                                                                                                                                                                                                                                                                                                                                                                                                                                                                                                                                                                                                                                                                                                                                                                                                                                                                                                                                                                                                                                                                                                                                                                                                                                                                                                                                                                                                                                                                                                       |
| Article Type:                 | Original research                                                                                                                                                                                                                                                                                                                                                                                                                                                                                                                                                                                                                                                                                                                                                                                                                                                                                                                                                                                                                                                                                                                                                                                                                                                                                                                                                                                                                                                                                                                                                                                                                                                                                                                                                                                                                                                                                                                                                                                                                                                                                                                                                                                                                                                                                                                                                                                            |
| Date Submitted by the Author: | 04-Aug-2021                                                                                                                                                                                                                                                                                                                                                                                                                                                                                                                                                                                                                                                                                                                                                                                                                                                                                                                                                                                                                                                                                                                                                                                                                                                                                                                                                                                                                                                                                                                                                                                                                                                                                                                                                                                                                                                                                                                                                                                                                                                                                                                                                                                                                                                                                                                                                                                                  |
| Complete List of Authors:     | <p>zhang, liu; Shanghai Jiao Tong University Medical School Affiliated Ruijin Hospital, Department of Respiratory and Critical Care Medicine; Shanghai Jiao Tong University School of Medicine, Institute of Respiratory Medicine</p> <p>Yan, Ya Ru; Shanghai Jiao Tong University Medical School Affiliated Ruijin Hospital, Department of Respiratory and Critical Care Medicine; Shanghai Jiao Tong University School of Medicine, Institute of Respiratory Medicine</p> <p>Li, Shi Qi; Shanghai Jiao Tong University Medical School Affiliated Ruijin Hospital, Department of Respiratory and Critical Care Medicine; Shanghai Jiao Tong University School of Medicine, Institute of Respiratory Medicine</p> <p>Li, Hong Peng; Shanghai Jiao Tong University Medical School Affiliated Ruijin Hospital, Department of Respiratory and Critical Care Medicine; Shanghai Jiao Tong University School of Medicine, Institute of Respiratory Medicine</p> <p>Lin, Ying Ni; Shanghai Jiao Tong University Medical School Affiliated Ruijin Hospital, Department of Respiratory and Critical Care Medicine; Shanghai Jiao Tong University School of Medicine, Institute of Respiratory Medicine</p> <p>Li, Ning; Shanghai Jiao Tong University Medical School Affiliated Ruijin Hospital, Department of Respiratory and Critical Care Medicine; Shanghai Jiao Tong University School of Medicine, Institute of Respiratory Medicine</p> <p>Sun, Xian Wen; Shanghai Jiao Tong University Medical School Affiliated Ruijin Hospital, Department of Respiratory and Critical Care Medicine; Shanghai Jiao Tong University School of Medicine, Institute of Respiratory Medicine</p> <p>Ding, Yong Jie; Shanghai Jiao Tong University Medical School Affiliated Ruijin Hospital, Department of Respiratory and Critical Care Medicine; Shanghai Jiao Tong University School of Medicine, Institute of Respiratory Medicine</p> <p>Li, Chuan Xiang; Shanghai Jiao Tong University Medical School Affiliated Ruijin Hospital, Department of Respiratory and Critical Care Medicine; Shanghai Jiao Tong University School of Medicine, Institute of Respiratory Medicine</p> <p>Li, Qing Yun; Shanghai Jiao Tong University Medical School Affiliated Ruijin Hospital, Department of Respiratory and Critical Care Medicine; Shanghai Jiao Tong University School of Medicine, Institute of Respiratory Medicine</p> |
| <b>Primary Subject            | Respiratory medicine                                                                                                                                                                                                                                                                                                                                                                                                                                                                                                                                                                                                                                                                                                                                                                                                                                                                                                                                                                                                                                                                                                                                                                                                                                                                                                                                                                                                                                                                                                                                                                                                                                                                                                                                                                                                                                                                                                                                                                                                                                                                                                                                                                                                                                                                                                                                                                                         |

1  
2  
3  
4  
5  
6  
7  
8  
9  
10  
11  
12  
13  
14  
15  
16  
17  
18  
19  
20  
21  
22  
23  
24  
25  
26  
27  
28  
29  
30  
31  
32  
33  
34  
35  
36  
37  
38  
39  
40  
41  
42  
43  
44  
45  
46  
47  
48  
49  
50  
51  
52  
53  
54  
55  
56  
57  
58  
59  
60

|                            |                                                                 |
|----------------------------|-----------------------------------------------------------------|
| Heading</b>:               |                                                                 |
| Secondary Subject Heading: | Respiratory medicine                                            |
| Keywords:                  | PUBLIC HEALTH, SLEEP MEDICINE, Adult anaesthesia < ANAESTHETICS |
|                            |                                                                 |

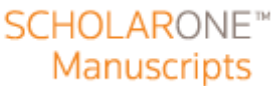



I, the Submitting Author has the right to grant and does grant on behalf of all authors of the Work (as defined in the below author licence), an exclusive licence and/or a non-exclusive licence for contributions from authors who are: i) UK Crown employees; ii) where BMJ has agreed a CC-BY licence shall apply, and/or iii) in accordance with the terms applicable for US Federal Government officers or employees acting as part of their official duties; on a worldwide, perpetual, irrevocable, royalty-free basis to BMJ Publishing Group Ltd ("BMJ") its licensees and where the relevant Journal is co-owned by BMJ to the co-owners of the Journal, to publish the Work in this journal and any other BMJ products and to exploit all rights, as set out in our [licence](#).

The Submitting Author accepts and understands that any supply made under these terms is made by BMJ to the Submitting Author unless you are acting as an employee on behalf of your employer or a postgraduate student of an affiliated institution which is paying any applicable article publishing charge ("APC") for Open Access articles. Where the Submitting Author wishes to make the Work available on an Open Access basis (and intends to pay the relevant APC), the terms of reuse of such Open Access shall be governed by a Creative Commons licence – details of these licences and which [Creative Commons](#) licence will apply to this Work are set out in our licence referred to above.

Other than as permitted in any relevant BMJ Author's Self Archiving Policies, I confirm this Work has not been accepted for publication elsewhere, is not being considered for publication elsewhere and does not duplicate material already published. I confirm all authors consent to publication of this Work and authorise the granting of this licence.

1  
2  
3 **Moderate-severe OSA screening based on support vector machine of the Chinese population**  
4  
5 **facio-cervical measurements dataset: a cross-sectional study**  
6  
7  
8  
9

10  
11 Liu Zhang\*<sup>1,2</sup>, Ya Ru Yan\*<sup>1,2</sup>, Shi Qi Li \*<sup>1,2</sup>, Hong Peng Li <sup>1,2</sup>, Ying Ni Lin <sup>1,2</sup>, Ning Li <sup>1,2</sup>, Xian Wen  
12 Sun <sup>1,2</sup>, Yong Jie Ding<sup>1,2</sup>, Chuan Xiang Li<sup>1,2</sup>, Qing Yun Li<sup>1,2</sup>  
13

14  
15  
16 <sup>1</sup>Department of Respiratory and Critical Care Medicine, Shanghai Jiao Tong University Medical  
17 School Affiliated Ruijin Hospital, Shanghai 200025, China  
18

19  
20 <sup>2</sup>Institute of Respiratory Medicine, Shanghai Jiao Tong University Medical School Affiliated Ruijin  
21 Hospital, Shanghai 200025, China  
22

23  
24 \* co-first authors  
25  
26  
27

28 **Corresponding author full contact details:**  
29

30 Name: Qing Yun Li, M.D, Ph.D.  
31

32 Address: Department of Respiratory and Critical Care Medicine, Shanghai Jiao Tong University  
33 Medical School Affiliated Ruijin Hospital, Shanghai 200025, China  
34

35 Post code: 200025  
36

37 City: Shanghai  
38

39 Country: China  
40

41 Email: [liqingyun68@hotmail.com](mailto:liqingyun68@hotmail.com)  
42

43 All authors have seen and approved the manuscript  
44

45 Financial support: This work was supported by grants from National Key R&D Program of China  
46 (2018YFC1311900) and the National Natural Science Foundation of China (founding no. 81770084,  
47 81700084, 81570082).  
48  
49

50 No conflicts of interest are to be reported.  
51  
52  
53  
54  
55  
56  
57  
58  
59  
60

**ABSTRACT:**

**Objectives** Obstructive sleep apnea (OSA) has received much attention as a risk factor for perioperative complications and 68.5% of OSA patients remain undiagnosed before surgery. Facio-cervical characteristics may screen OSA for Asians due to smaller upper airways compared to Caucasians. Thus, our study aimed to explore a machine-learning model to screen moderate-severe OSA based on facio-cervical and anthropometric measurements.

**Design** A cross-sectional study.

**Setting** Data were collected from the Shanghai Jiao Tong University School of Medicine affiliated Ruijin Hospital between February 2019 and August 2020.

**Participants** A total of 481 Chinese participants were included in the study.

**Primary and secondary outcome** (1) Identification of moderate-severe OSA with apnea-hypopnea index (AHI)15 events·h<sup>-1</sup>. (2) Verification of the machine learning model.

**Results** The SABIHC2 model (*Sex-Age-Body mass index-maximum Interincisal distance-ratio of Height to thyro-sternum distance-neck Circumference-waist Circumference*) was set up. The SABIHC2 model could screen moderate-severe OSA with an area under the curve (AUC)=0.832, the sensitivity of 0.916, and specificity of 0.749, and performed better than the STOP-BANG questionnaire, which showed AUC=0.631, the sensitivity of 0.487, and specificity of 0.772. Especially for asymptomatic patients (ESS < 10), the SABIHC2 model demonstrated better predictive ability compared to the STOP-BANG questionnaire, with AUC (0.824 vs. 0.530), sensitivity (0.892 vs. 0.348), and specificity (0.755 vs. 0.809).

**Conclusion** The SABIHC2 machine learning model provides a simple and accurate assessment of moderate-severe OSA in the Chinese population, especially for those without significant daytime sleepiness.

**Keywords:** obstructive sleep apnea, machine learning, anthropometric, screening

### Strengths and limitations of this study

- This is the first study to assess the screening value of facio-cervical measurements in predicting moderate-severe OSA.
- Support vector machine, a well-known machine learning method, was used to set up the model to screen moderate-severe OSA in the Chinese population.
- Instead of most questionnaires based on symptoms and comorbidities, the SABIHC2 model which is entirely based on measurements, avoids the confounding effect of symptoms and comorbidities.
- The cross-sectional design of the study makes it difficult to establish the causal relationship between variables.
- The study is a single-centre study with a relatively small sample size, and further confirmation with large-sample, multi-centre, prospective clinical trial is needed in the future.

## INTRODUCTION

Obstructive sleep apnea (OSA) is a common breathing sleep disorder that affects about 936 million adults globally,<sup>1</sup> of which about 80% are estimated to be undiagnosed.<sup>2</sup> In the Chinese population, approximately 175 million adults have mild to severe obstructive sleep apnea, of whom about 65 million adults have moderate-severe obstructive sleep apnea.<sup>1</sup> In addition to cardiovascular injury and metabolic syndrome, OSA has recently been regarded as a risk factor for perioperative complications, including hypoxaemia, pneumonia, pulmonary embolism, unplanned transfer to the intensive care unit, and even death, especially for those who received abdominal or vascular surgery.<sup>3</sup> The rates of postoperative cardiovascular events show a rise in moderate-severe OSA (25.1%) compared to no or mild OSA(16.8%).<sup>4</sup> 38% of surgical patients had moderate-severe OSA, of which 68.5% were not diagnosed before surgery.<sup>5</sup> Guidelines have been recommended to develop a local protocol for screening possible OSA patients before elective surgery.<sup>6,7</sup> The most common screening scales, including STOP-BANG, Berlin questionnaire, and OSA50, are mainly based on symptoms and comorbidities,<sup>8</sup> which might lead to missed diagnoses for those without significant daytime sleepiness.

Several factors contribute to the pathogenesis of OSA, including obesity, facio-cervical anatomy, and alteration in pharyngeal muscle function, etc.<sup>9</sup> Asians have relatively smaller upper airways compared to Caucasians.<sup>10</sup> Only in Asians, smaller upper airways are predictors of upper airway collapsibility, and an anatomic imbalance between tongue and mandible volume influenced upper airway collapsibility among Caucasians.<sup>11</sup> The above evidence prompts facio-cervical characteristics that may predict OSA for Asians, such as thyromental distance (TMD), thyro-sternum distance (TSD), maximum interincisal distance (MID), and Mallampati test score, which have been widely used in predicting difficult intubation.<sup>12</sup> However, no studies assessed whether facio-cervical characteristics are suitable for predicting OSA. Thus, it is necessary to evaluate the relationship between facio-cervical characteristics and OSA.

During the past two decades, machine learning models have provided simple but effective approaches for improving diagnostic accuracy.<sup>13</sup> Support vector machine (SVM) is a well-known classification

1  
2  
3 technique and has achieved great success in bioinformatics applications. Thus, the study aimed to  
4  
5 build a new model via SVM and monitor its effectiveness in screening OSA.  
6  
7  
8

## 9 **METHODS**

### 10 **Study design**

11  
12 Participants with suspected OSA (snoring, witnessed apnea, or excessive daytime sleepiness, etc.)  
13  
14 were enrolled in the study from Ruijin Hospital, Shanghai Jiao Tong University School of Medicine  
15  
16 between February 2019 and August 2020. All participants underwent anthropometric measurements  
17  
18 and subsequent overnight polysomnography (PSG). Participants were grouped according to their AHI  
19  
20 gain into the following: 1) no or mild OSA (subjects without moderate-to-severe OSA: AHI <15  
21  
22 events·h<sup>-1</sup>), 2) moderate-severe OSA (moderate to severe OSA: AHI ≥ 15 events·h<sup>-1</sup>). Exclusion  
23  
24 criteria: (1) Patients showing complications with severe respiratory diseases, such as severe COPD,  
25  
26 interstitial lung disease, or acute asthma; (2) Patients showing complications with serious  
27  
28 cardiovascular diseases such as acute myocardial infarction, acute heart failure, or chronic congestive  
29  
30 heart failure (Grade III and IV); (3) Patients with mental illnesses who could not cooperate with the  
31  
32 examination; (4) Patients who receiving non-invasive positive pressure ventilation therapy; (5)  
33  
34 Patients who might have other sleep disorders under clinical evaluation.  
35  
36  
37  
38

39 The study was approved by the Ethics Committee of Shanghai Jiao Tong University School of  
40  
41 Medicine at Ruijin Hospital (Protocol #2018-107). Written informed consent was obtained from all  
42  
43 participants. Patients or the public were not involved in the design, or conduct, or reporting, or  
44  
45 dissemination plans of our research.  
46

### 47 **Clinical characteristics and anthropometric measurements**

48  
49 Age, sex, height, weight, BMI, neck circumference (NC), waist circumference (WC), Epworth  
50  
51 Sleepiness Scale (ESS), and STOP-BANG questionnaire were recorded. The STOP-BANG  
52  
53 questionnaire is a scoring model consisting of eight questions and its scores are based on Yes/No  
54  
55 answers (score: 1/0). The eight questions included snoring, tiredness, observed apnea, high blood  
56  
57 pressure, BMI, age, neck circumference, and gender. Facio-cervical measurements including  
58  
59 Mallampati score, MID, TMD, and TSD were measured. The Mallampati score was evaluated when  
60



1  
2  
3 participants were asked to sit upright and open their mouths as wide as possible. In grade I, the entire  
4 uvula, faucial pillar, and soft palate are visible. In grade II, part of the uvula and palate are visible. In  
5 grade III, the soft palate is visible, but the uvula is obscured.<sup>14</sup> MID was recorded by asking the  
6 participant to sit upright and open the mouth as wide as possible.<sup>15</sup> The TMD was measured as the  
7 straight distance between the thyroid notch and the lower border of the mental prominence, while the  
8 head was fully extended, and the mouth closed.<sup>16</sup> TSD was measured as the distance between the  
9 thyroid notch and the upper border of the sternum. The distance was rounded to the nearest 0.5 cm.  
10 The ratios of height to TMD (H/TMD) and height to TSD (H/TSD) were calculated.<sup>16</sup>

## 11 12 13 14 15 16 17 18 19 20 **PSG**

21 All participants underwent overnight PSG. No coffee, tea, caffeine-containing products, or sedative-  
22 hypnotics were taken before sleep. The PSG monitoring included electroencephalography,  
23 electrooculography, chin electromyography, electrocardiography, measurements of thoracic and  
24 abdominal movements, and airflow pressure and thermistor (Alice 5, Philips Respironics, USA), with  
25 the addition of oxygen saturation (Nonin, Hirsching, Germany). Sleep recordings were scored  
26 according to the American Academy of Sleep Medicine (AASM) 2007 criteria.<sup>17</sup> The diagnosis of  
27 moderate-severe OSA was defined by the presence of an obstructive  $AHI \geq 15$  events·h<sup>-1</sup> according to  
28 AASM guidelines.

## 29 30 31 32 33 34 35 36 37 38 **Statistical analysis**

39 Continuous variables with a normal distribution are presented as mean  $\pm$  standard deviation, while  
40 values without a normal distribution are presented as median (25th to 75th percentiles). Categorical  
41 variables are presented as numbers and percentages. Independent samples t-test and Mann–Whitney U  
42 test were used to determine differential risk factors between the two groups. The chi-square test and  
43 Fisher's exact chi-square test were used to compare the categorical data, as appropriate. Logistic  
44 regression analyses were performed to calculate the odds ratio (OR). Receiver operating characteristic  
45 (ROC) analysis was used to determine the area under the curve (AUC) with a 95% confidence interval  
46 (CI), sensitivity, and specificity. All tests were two-sided and used a significance level of 0.05. All  
47 analyses were performed using the SPSS software (version 24.0; SPSS Inc. Chicago, IL, USA).

## 48 49 50 51 52 53 54 55 56 57 58 59 60 **Model construction via SVM**

1  
2  
3 SVM is a representative machine-learning algorithm for classification, which could be viewed as a  
4  
5 nonlinear regression model. We used the SVM to capture the potential hyperplane that maximises the  
6  
7 margin between moderate or severe OSA and no or mild OSA. The SVM has the following format:  
8

$$C = \sum_{i=1}^n \alpha_i k(x_i, x) + b$$

9  
10  
11 Where  $c$  is the output of the model based on the new data  $x$ , which could be regarded as the classifier  
12  
13 (0 or 1),  $x_i$  ( $i=1, \dots, n$ ) is the training dataset,  $\alpha_i$  and  $b$  are parameters determined by the algorithm.<sup>18</sup>  
14

15 We used the Gaussian radial basis function as the kernel function, with  $\gamma$  of 0.23 and the box  
16  
17 constraint set to 20. Based on the results of the statistical analysis, sex, age, NC, WC, BMI, MID, and  
18  
19 H/TSD were set as independent variables ( $p < 0.05$ ). We performed a significant principal component  
20  
21 taking into account the strong collinearity among parameters, such as BMI and WC. Five principal  
22  
23 components were selected according to the accumulative variance contribution of more than 90% and  
24  
25 scree plot.<sup>19</sup>  
26

27  
28 The performance of the SVM methods was evaluated by the ten-fold cross-validation. The  
29  
30 participants were stratified sampling into ten subsamples: one formed the test dataset for verifying the  
31  
32 effectiveness of the model, and the others formed the training dataset to predict moderate-severe OSA  
33  
34 for the model. The SVM model, namely SABIHC, i.e., sex, age, BMI, MID, H/TSD, NC, and WC (2  
35  
36 Cs) was estimated by the training dataset and then applied to predict OSA in the testing dataset. The  
37  
38 flow chart including screening, randomisation, and algorithm is presented in Figure 1.  
39

40  
41 The screening performance was assessed using sensitivity, specificity, area under the curve (AUC),  
42  
43 negative likelihood ratio (-LR), positive likelihood ratio (+LR), and accuracy. Visual optimal  
44  
45 hyperplanes for the Support Vector Machine are shown in Figure 2. Finally, we compared the  
46  
47 difference in predictive power between the STOP-BANG questionnaire and the SVM model.  
48

49 Analyses were performed using the Scikit-learn package (0.20.3) based on Python (3.5.1).  
50  
51  
52  
53  
54  
55  
56  
57  
58  
59  
60

**Table 1** Subject demographics, crude, and adjusted associations between morphometric variables and moderate-severe OSA.

|                             | All patients<br>(n=481) | AHI<15<br>(n=171) | AHI≥15<br>(n=310) | p-value* | crude OR (95% CI) # | p-value‡ | adjusted OR for BMI<br>(95% CI) # | p-value‡ |
|-----------------------------|-------------------------|-------------------|-------------------|----------|---------------------|----------|-----------------------------------|----------|
| General characteristics     |                         |                   |                   |          |                     |          |                                   |          |
| Male (%)                    | 325(67.6%)              | 93(54.39%)        | 232(74.84%)       | <0.001   | 0.401(0.270-0.595)  | <0.001   | 0.463(0.308-0.697)                | <0.001   |
| Age                         | 47.32±12.94             | 44.05±13.80       | 49.11±12.08       | <0.001   | 1.032(1.016-1.048)  | <0.001   | 1.037(1.021-1.054)                | <0.001   |
| NC                          | 39.05±4.17              | 37.63±3.74        | 39.83±4.20        | <0.001   | 1.146(1.090-1.205)  | <0.001   | 1.121(0.054-1.193)                | <0.001   |
| WC                          | 94.97±11.32             | 90.58±11.93       | 97.39±10.20       | <0.001   | 1.109(1.041-1.081)  | <0.001   | 1.074(1.041-1.107)                | <0.001   |
| BMI                         | 26.26±4.16              | 25.18±4.16        | 26.85±4.04        | <0.001   | 1.109(1.056-1.166)  | <0.001   | N/A                               | N/A      |
| Facio-cervical measurements |                         |                   |                   |          |                     |          |                                   |          |
| MID                         | 4.88±0.88               | 4.76±0.79         | 4.94±0.92         | 0.028    | 1.275(1.025-1.585)  | 0.029    | 1.298(1.037-1.626)                | 0.023    |
| Mallampati test=1           | 195(40.5%)              | 77(45.02%)        | 118(38.06%)       |          | N/A                 | N/A      | N/A                               | N/A      |
| Mallampati test=2           | 142(29.5%)              | 54(31.58%)        | 88(28.39%)        | 0.12     | 0.589(0.371-0.938)† | 0.026†   | 0.679(0.421-1.095) †              | 0.113†   |
| Mallampati test=3           | 144(29.9%)              | 40(23.40%)        | 104(33.55%)       |          | 0.627(0.381-1.031)† | 0.066†   | 0.713(0.428-1.186) †              | 0.192†   |
| H/TMD                       | 18.98±2.75              | 18.69±2.30        | 19.14±2.95        | 0.085    | 1.064(0.991-1.142)  | 0.086    | 1.071(0.998-1.150)                | 0.057    |
| H/TSD                       | 18.92±2.97              | 17.49±2.06        | 19.70±3.10        | <0.001   | 1.448(1.311-1.599)  | <0.001   | 1.458(1.417-1.614)                | <0.001   |

Data are presented as mean± SD or n (%). \*: t test or chi-square test as appropriate. ‡: logistic regression. #: Odds ratios are depicted for moderate-severe OSA relative to no or mild OSA. N/A: not applicable. †: Odds ratios of Mallampati test are depicted for Mallampati test=2 (or 3) relative to Mallampati test=1.

Abbreviation: NC; neck circumference; WC: waist circumference; BMI: body mass index; MID: maximum interincisal distance; H/TMD: ratio of height to thyromegaly distance; H/TSD: ratio of height to thyro-sternum distance.

## RESULTS

A total of 512 participants were recruited for the study at first, among which 31 patients were excluded due to short total sleep time (<200 min, 13 cases) or missing data (18 cases). Finally, 481 participants (325 males and 156 females; aged between 14-77 y) were enrolled in our study (Figure 1). The participants were divided into no or mild OSA (AHI<15 events·h<sup>-1</sup>, n=171, mean AHI 7.01 ± 4.47 events·h<sup>-1</sup>) and moderate-severe OSA (AHI≥15 events·h<sup>-1</sup>, n=310, mean AHI 42.4 ± 20.7 events·h<sup>-1</sup>). Increased BMI, NC, WC, older age, and a higher percentage of males were found in moderate-severe OSA (*p*<0.001). Meanwhile, they had a higher micro-arousal index (MAI) (32.5 ± 13.2 vs 16.4 ± 8.3 events·h<sup>-1</sup>) and lower lowest pulse oxygen saturation (LSpO<sub>2</sub>) (72.1 ± 13.3 vs 87.13 ± 6.3 %) than no or mild OSA (*p*<0.001) (Table 1).

### Associations Between Facio-cervical Characteristics and OSA

Greater MID (4.94 vs 4.76, *p*=0.028) and H/TSD (19.70 vs 17.49, *p*<0.001) were found in the moderate-severe group compared to no or mild OSA. MID (OR=1.275, adjusted OR=1.298) and H/TSD (OR=1.448, adjusted OR=1.458) are associated with moderate-severe OSA, even after controlling for BMI. No significant inter-group differences were found in Mallampati test scores and H/TMD (*p*>0.05) (Table 1).

### Set-up and Predictive Accuracy of the SABIHC2 model

Age, sex, NC, WC, BMI, and facio-cervical measurements (MID, H/TSD) were chosen as covariates because a significant difference was found between the two groups. We set up the SABIHC2 model, whose name refers to *sex*, *age*, *BMI*, *MID*, *H/TSD*, *NC*, and *WC* (2 Cs). The AUC was 0.832 (95% CI, 0.790 to 0.875), with a sensitivity of 0.916 and specificity of 0.749. Corresponding LR+ and LR- were 3.649 and 0.112, respectively (Table 2, Figure 3A). The accuracy of the SABIHC2 model was 0.857, of which 0.916 for the moderate-severe group (blue dots in the purple area; Figure 2), and 0.748 for no or mild OSA (green dots in the green area; Figure 2).

**Table 2** Performance of SABIHC2 model

|           | Sensitivity | Specificity | AUC   | 95% CI      | +LR   | -LR   |
|-----------|-------------|-------------|-------|-------------|-------|-------|
| SABIHC2   | 0.916       | 0.749       | 0.832 | 0.790-0.875 | 3.649 | 0.112 |
| STOP-BANG | 0.487       | 0.772       | 0.631 | 0.581-0.682 | 2.136 | 0.665 |

Abbreviations: SABIHC2 = Sex-age-BMI-MID-H/TSD-NC-WC. +LR: positive likelihood ratio; -LR: negative likelihood ratio

### Discriminative Ability of the SABIHC2 model and STOP-BANG questionnaire

To compare the predictive ability between the SABIHC2 model and the STOP-BANG questionnaire, we calculated the ROC curve of STOP-BANG for moderate-severe OSA. The AUC was 0.631 (95% CI, 0.581 to 0.682), with a sensitivity of 0.487 and specificity of 0.772. (Table 2, Figure 3A).

As the STOP-BANG questions are based on the symptoms and comorbidities and may result in missed diagnoses, we further compared whether there are differences in the predictive capacity of the SABIHC2 model and STOP-BANG questionnaire both for the symptomatic ( $ESS \geq 10$ ) and asymptomatic patients ( $ESS < 10$ ). For asymptomatic patients, the SABIHC2 model demonstrated better predictive ability than the STOP-BANG questionnaire, with AUC (0.824 vs. 0.530), sensitivity (0.892 vs. 0.348), and specificity (0.755 vs. 0.809). Similarly, the SABIHC2 model had higher predictive power than the STOP-BANG questionnaire in patients experiencing sleepiness ( $ESS \geq 10$ ), with AUC (0.841 vs. 0.720), sensitivity (0.941 vs. 0.632), and specificity (0.740 vs. 0.727) (Figure 3B).

## DISCUSSION

In the current study, we measured a broad range of anthropometric variables and assessed the association with moderate-severe OSA. Sex, age, BMI, MID, H/TSD, NC, and WC were significant determining factors. We also developed the SABIHC2 predictive model, which provides a simple and accurate assessment of moderate-severe OSA.

Facio-cervical measurements are essential factors related to OSA. The majority of previous studies focused on the soft tissue of the upper airway. A significant correlation between the oropharyngeal

1  
2  
3 soft tissue (Mallampati test and tonsillar enlargement, etc.) and AHI was reported.<sup>20,21</sup> However, the  
4  
5 Mallampati test was not a significant parameter in our study. It is possible that the association  
6  
7 between soft tissue and OSA is weak in Asian populations.<sup>11</sup> No previous studies explored the  
8  
9 relationship between moderate-severe OSA and facio-cervical measurements, such as MID, H/TMD,  
10  
11 and H/TSD, which have been frequently used to evaluate difficult intubation. Herein, we found that  
12  
13 MID and H/TSD were strongly associated with moderate-severe OSA, and H/TSD showed a  
14  
15 significant correlation with moderate-severe OSA, even controlling for BMI. The result may suggest  
16  
17 that H/TSD is a potential factor for moderate-severe OSA in Chinese subjects.

18  
19 As indicated previously, the overall scarcity and labour- and financially-onerous nature of PSG has  
20  
21 prompted exploration of other suitable screening approaches, ranging from questionnaires to  
22  
23 simplified multichannel recording. The STOP-BANG is one of the most widely used questionnaires.  
24  
25 Some limitations of the STOP-BANG questionnaire should be considered. Firstly, it is based on  
26  
27 simplified categories (0 or 1) and this might reduce its screening accuracy.<sup>22</sup> Secondly, the evaluation  
28  
29 is based on symptoms and comorbidities, which may lead to the omission of diagnosis for snorers  
30  
31 without significant daytime sleepiness or hypertension.<sup>23</sup> Thus, we developed a new screening tool  
32  
33 based on facio-cervical measurements by machine learning.

34  
35 Considering non-linear relationships and data interaction effects,<sup>24</sup> the machine learning algorithm  
36  
37 (SVM) was used to find the complex linkages between variables. Distinct from previous machine  
38  
39 learning models which were based on age, sex, NC, WC, and BMI,<sup>25,26</sup> we included the structural  
40  
41 facio-cervical measurements to construct the SABIHC2 model. This showed much better performance  
42  
43 than the STOP-BANG in screening for OSA.

44  
45 The results confirmed that the SABIHC2 model performed better than the STOP-BANG  
46  
47 questionnaire in predicting moderate-severe OSA, especially for asymptomatic patients (ESS < 10),  
48  
49 which prompted that it may be particularly useful for this cohort of patients. As most models work,  
50  
51 we are planning to develop a software or application in the future, to allow health care worker-  
52  
53 friendly installation and application.

54  
55 To our knowledge, this is the first study examining the predictive power of facio-cervical  
56  
57 measurements, which may become a new index to predict OSA besides sex, age, and BMI. However,  
58  
59  
60

1  
2  
3 several limitations should be mentioned. First, the study cohort was based on the Chinese population.  
4  
5 The results obtained are hard to generalise for other populations. Second, the cross-sectional design of  
6  
7 the study makes it difficult to establish the causal relationship between variables. Third, the sample  
8  
9 size was relatively small, and it was a single-centre study, which may affect the validation of the  
10  
11 machine-learning algorithm model.  
12

13  
14 In conclusion, we confirmed that facio-cervical measurements are associated with moderate-severe  
15  
16 OSA in the Chinese population. The machine learning model called the SABIHC2 model was set up  
17  
18 based on facio-cervical and anthropometric measurements. The model is more effective than the  
19  
20 STOP-BANG questionnaire in predicting moderate-severe OSA, especially for those without  
21  
22 significant daytime symptoms.  
23  
24  
25  
26  
27  
28  
29  
30  
31  
32  
33  
34  
35  
36  
37  
38  
39  
40  
41  
42  
43  
44  
45  
46  
47  
48  
49  
50  
51  
52  
53  
54  
55  
56  
57  
58  
59  
60

**REFERENCES**

1. Benjafield AV, Ayas NT, Eastwood PR, et al. Estimation of the global prevalence and burden of obstructive sleep apnoea: a literature-based analysis. *Lancet Respir Med*. 2019;7(8):687-698.
2. Young T, Evans L, Finn L, et al. Estimation of the clinically diagnosed proportion of sleep apnea syndrome in middle-aged men and women. *Sleep*. 1997;20(9):705-706.
3. Kaw R, Pasupuleti V, Walker E, et al. Postoperative complications in patients with obstructive sleep apnea. *Chest*. 2012; 141: 436-41.
4. Chan MTV, Wang CY, Seet E, et al. Postoperative Vascular Complications in Unrecognized Obstructive Sleep Apnea (POSA) Study Investigators. Association of Unrecognized Obstructive Sleep Apnea With Postoperative Cardiovascular Events in Patients Undergoing Major Noncardiac Surgery. *JAMA*. 2019 May 14;321(18):1788-1798.
5. Singh M, Liao P, Kobah S, et al. Proportion of surgical patients with undiagnosed obstructive sleep apnoea. *Br J Anaesth*. 2013 Apr;110(4):629-36.
6. American Society of Anesthesiologists Task Force on Perioperative Management of patients with obstructive sleep apnea. Practice guidelines for the perioperative management of patients with obstructive sleep apnea: an updated report by the American Society of Anesthesiologists Task Force on Perioperative Management of patients with obstructive sleep apnea. *Anesthesiology*. 2014;120(2):268-286. Available: <https://pubmed.ncbi.nlm.nih.gov/24346178/>
7. Dalesio NM, Hendrix CW, McMichael DH, et al. Effects of Obesity and Leptin Deficiency on Morphine Pharmacokinetics in a Mouse Model. *Anesth Analg*. 2016 Dec;123(6):1611-1617.
8. Kee K, Dixon J, Shaw J, et al. Comparison of Commonly Used Questionnaires to Identify Obstructive Sleep Apnea in a High-Risk Population. *J Clin Sleep Med*. 2018; 14: 2057-64.
9. Lévy P, Kohler M, McNicholas WT, et al. Obstructive sleep apnoea syndrome. *Nat Rev Dis Primers*. 2015;7(1):15015.
10. Sutherland K, Lee RW, Cistulli PA. Obesity and craniofacial structure as risk factors for obstructive sleep apnoea: impact of ethnicity. *Respirology*. 2012; 17: 213-22.
11. Schorr F, Kayamori F, Hirata RP, et al. Different Craniofacial Characteristics Predict Upper Airway Collapsibility in Japanese-Brazilian and White Men. *Chest*. 2016; 149: 737-46.



- 1  
2  
3 12.Roth D, Pace NL, Lee A, et al. Airway physical examination tests for detection of difficult airway  
4 management in apparently normal adult patients. *Cochrane Database Syst Rev* 2018; 5: CD008874.  
5 Available: [http:// doi:10.1111/ijn.12805](http://doi:10.1111/ijn.12805)  
6  
7  
8  
9 13.Obermeyer Z, Emanuel EJ. Predicting the Future - Big Data, Machine Learning, and Clinical  
10 Medicine. *N Engl J Med* 2016; 375: 1216-9.  
11  
12  
13 14.Menon SM, Sampangiramaiah S, Mathew M. Cross Sectional Observational Study Performed to  
14 See for Relation of Mallampati Score and Extended Mallampati Score with Body Mass Index. *J Clin*  
15 *Diagn Res* 2017; 11: Ug01-ug03.  
16  
17  
18 15.Den Herder C, Schmeck J, Appelboom DJ, et al. Risks of general anaesthesia in people with  
19 obstructive sleep apnoea. *BMJ* 2004; 329: 955-9.  
20  
21  
22  
23 16.Schmitt HJ, Kirmse M, Radespiel-Troger M. Ratio of patient's height to thyromental distance  
24 improves prediction of difficult laryngoscopy. *Anaesth Intensive Care*. 2002; 30: 763-5.  
25  
26  
27 17.The Report of an American Academy of Sleep Medicine Task Force. Sleep-related breathing  
28 disorders in adults: recommendations for syndrome definition and measurement techniques in clinical  
29 research. *Sleep*. 1999; 22: 667-89.  
30  
31  
32  
33 18.Liu WT, Wu HT, Juang JN, et al Prediction of the severity of obstructive sleep apnea by  
34 anthropometric features via support vector machine. *PLoS ONE*. 2017; 12: e0176991.  
35  
36  
37  
38 19. Björklund M. Be careful with your principal components. *Evolution*. 2019 Oct;73(10):2151-2158.  
39  
40  
41 20.Schellenberg JB, Maislin G, Schwab RJ. Physical findings and the risk for obstructive sleep apnea.  
42 The importance of oropharyngeal structures. *Am J Respir Crit Care Med*. 2000; 162: 740-8.  
43  
44  
45 21.Schwab RJ, Leinwand SE, Bearn CB, et al. Digital Morphometrics: A New Upper Airway  
46 Phenotyping Paradigm in OSA. *Chest* 2017; 152: 330-42.  
47  
48  
49 22.Chung F, Abdullah HR, Liao P. STOP-BANG Questionnaire: A Practical Approach to Screen for  
50 Obstructive Sleep Apnea. *Chest*. 2016;149(3):631-638.  
51  
52  
53 23.Ye L, Pien GW, Ratcliffe SJ, et al. The different clinical faces of obstructive sleep apnoea: a  
54 cluster analysis. *Eur Respir J*. 2014; 44:1600-7.  
55  
56  
57  
58  
59  
60

- 1  
2  
3 24.Linnen DT, Escobar GJ, Hu X, et al. Statistical Modeling and Aggregate-Weighted Scoring  
4 Systems in Prediction of Mortality and ICU Transfer: A Systematic Review. *J Hosp Med.* 2019;  
5 14:161–9.  
6  
7  
8  
9 25.Mencar C, Gallo C, Mantero M, et al. Application of machine learning to predict obstructive sleep  
10 apnea syndrome severity. *Health Informatics J.* 2019;1460458218824725. Available: [http://](http://doi:10.1177/1460458218824725)  
11 [doi:10.1177/1460458218824725](http://doi:10.1177/1460458218824725)  
12  
13  
14  
15 26.Bozkurt S, Bostanci A, Turhan M. Can Statistical Machine Learning Algorithms Help for  
16 Classification of Obstructive Sleep Apnea Severity to Optimal Utilization of Polysomnography  
17 Resources? *Methods Inf Med.* 2017; 56:308–18.  
18  
19  
20  
21  
22  
23

#### 24 **Author affiliations**

25  
26 <sup>1</sup>Department of Respiratory and Critical Care Medicine, Ruijin Hospital, Shanghai Jiao Tong  
27 University School of Medicine, Shanghai 200025, China

28  
29 <sup>2</sup>Institute of Respiratory Medicine, Shanghai Jiao Tong University School of Medicine, Shanghai  
30 200025, China  
31  
32  
33

34  
35 **Acknowledgements** The authors thank Peizhe Liu for his assistance with the SVM algorithm.

36  
37 **Author contributions** Liu Zhang and Ya Ru Yan drafted the manuscript, had full access to all the  
38 data, and takes responsibility for the integrity of the data and the accuracy of the data analysis. Shi Qi  
39 Li contributed to data analysis and interpretation. Qing Yun Li and Shi Qi Li contributed to study  
40 conception and design. Hong Peng Li, Ying Ni Lin, Ning Li, Xian Wen Sun, Yong Jie Ding  
41 contributed to data collection, critical revision. Chuan Xiang Li and Qing Yun Li contributed to final  
42 approval of the manuscript.  
43  
44  
45  
46  
47  
48

49  
50 **Funding** This work was supported by grants from National Key R&D Program of China  
51 (2018YFC1311900) and the National Natural Science Foundation of China (funding no. 81770084,  
52 81700084, 81570082). No conflicts of interest are to be reported  
53  
54  
55

56 **Competing interests** None declared.

57  
58 **Patient and Public Involvement statement** Patients or the public were not involved in the design, or  
59 conduct, or reporting, or dissemination plans of our research  
60

**Ethics approval** The study was approved by the ethics committee of the Shanghai Jiao Tong University School of Medicine at Ruijin Hospital, with the following reference number: 2018-107.

**Data availability statement** Extra data can be accessed via the Dryad data repository at <http://datadryad.org/> with the doi: 10.5061/dryad.qnk98sfhg.

#### FIGURE LEGENDS:

**Figure 1.** Flow chart showing screening, randomisation and algorithm.

481 participants were enrolled in our study after excluding 31 patients. Age, sex, NC, WC, BMI, and facio-cervical measurements (MID, H/TSD) were potential factors related to OSA due to the significant difference between the two groups ( $p < 0.05$ ). We chose the following parameters to setup the SABIHC2 model based on training dataset, whose name refers to sex, *age*, *BMI*, *MID*, *H/TSD*, *NC*, and *WC (2 Cs)*. Then, the model was verified on testing dataset.

Abbreviations: BMI: body mass index; MID: maximum interincisal distance; H/TMD: ratio of height to thyromegaly distance; H/TSD: ratio of height to thyro-sternum distance; NC: neck circumference; WC: waist circumference;

**Figure 2.** Optimal hyperplane for Support Vector Machine (SVM). The green area means the SVM predicting  $AHI < 15$  events·h<sup>-1</sup>, the purple means the SVM predicts the  $AHI \geq 15$  events·h<sup>-1</sup>. Green dots represent no or mild OSA ( $AHI < 15$  events·h<sup>-1</sup>), blue dots represent moderate-severe OSA ( $AHI \geq 15$  events·h<sup>-1</sup>). The accuracy of SABIHC2 model based on all patients was 0.881, of which 0.928 for moderate-severe OSA (blue dots in purple area), and 0.719 for no or mild OSA (green dots in green area). The boundary was obtained from the SVM classifier and the figure was created using Python.

Abbreviations: SVM: support vector machine; SABIHC2 model: sex, *age*, *BMI*, *MID*, *H/TSD*, *NC*, and *WC (2 Cs)*.

**Figure 3.** ROC curve of SABIHC2 model and STOP-BANG.

**A:** The ROC curve of SABIHC2 model and STOP-BANG. The AUC of the SABIHC2 model based on the training database ( $n=337$ , 70.1%, brown line) was 0.829 (95% CI, 0.777 to 0.880), with a

1  
2  
3 sensitivity of 0.930 and specificity of 0.727. About testing database (n=144 29.9%, red line), the AUC  
4 was 0.787 (95% CI, 0.702 to 0.872), with a sensitivity of 0.874 and specificity of 0.700, respectively.

5  
6  
7 The ROC curve of STOP-BANG questionnaire (blue line) on the testing database was 0.597 (95% CI,  
8 0.499 to 0.694). STOP-BANG>2 showed the sensitivity and specificity of 0.832 and 0.220,  
9  
10  
11 respectively, while STOP-BANG>4 with the sensitivity of 0.495 and specificity of 0.780.

12  
13  
14 Brown: SVM based on training dataset; red: SVM based on testing dataset; blue: STOP-BANG based  
15 on testing dataset.

16  
17  
18 **B:** The ROC curve of SABIHC2 model and STOP-BANG based on asymptomatic patients (ESS <  
19 10) and sleepiness patients (ESS  $\geq$  10). In asymptomatic patients, SABIHC2 model (red line)  
20 remarkably demonstrated better predictive ability than STOP-BANG questionnaire (dark blue line),  
21 with AUC (0.810 vs. 0.571), sensitivity (0.910 vs. 0.404), and specificity (0.709 vs. 0.788). Similarly,  
22 SABIHC2 model (orange line) had higher predictive power than STOP-BANG questionnaire (soft  
23 blue line) in sleepiness patients (ESS  $\geq$  10), with sensitivity (0.830 vs. 0.813), and specificity (0.699  
24 vs. 0.478) and AUC (0.762 vs. 0.606).  
25  
26  
27  
28  
29  
30  
31

32  
33 Abbreviations: AUC: the area under ROC curve; SVM: support vector machine; CIs: confidence  
34 intervals.  
35  
36  
37  
38  
39  
40  
41  
42  
43  
44  
45  
46  
47  
48  
49  
50  
51  
52  
53  
54  
55  
56  
57  
58  
59  
60



279x175mm (300 x 300 DPI)

1  
2  
3  
4  
5  
6  
7  
8  
9  
10  
11  
12  
13  
14  
15  
16  
17  
18  
19  
20  
21  
22  
23  
24  
25  
26  
27  
28  
29  
30  
31  
32  
33  
34  
35  
36  
37  
38  
39  
40  
41  
42  
43  
44  
45  
46  
47  
48  
49  
50  
51  
52  
53  
54  
55  
56  
57  
58  
59  
60



90x65mm (300 x 300 DPI)

1  
2  
3  
4  
5  
6  
7  
8  
9  
10  
11  
12  
13  
14  
15  
16  
17  
18  
19  
20  
21  
22  
23  
24  
25  
26  
27  
28  
29  
30  
31  
32  
33  
34  
35  
36  
37  
38  
39  
40  
41  
42  
43  
44  
45  
46  
47  
48  
49  
50  
51  
52  
53  
54  
55  
56  
57  
58  
59  
60



189x89mm (300 x 300 DPI)

| Section & Topic          | No  | Item                                                                                                                                                   | Reported on page # |
|--------------------------|-----|--------------------------------------------------------------------------------------------------------------------------------------------------------|--------------------|
| <b>TITLE OR ABSTRACT</b> |     |                                                                                                                                                        |                    |
|                          | 1   | Identification as a study of diagnostic accuracy using at least one measure of accuracy (such as sensitivity, specificity, predictive values, or AUC)  | Page 2             |
| <b>ABSTRACT</b>          |     |                                                                                                                                                        |                    |
|                          | 2   | Structured summary of study design, methods, results, and conclusions (for specific guidance, see STARD for Abstracts)                                 | Page 2             |
| <b>INTRODUCTION</b>      |     |                                                                                                                                                        |                    |
|                          | 3   | Scientific and clinical background, including the intended use and clinical role of the index test                                                     | Page 4             |
|                          | 4   | Study objectives and hypotheses                                                                                                                        | Page 4             |
| <b>METHODS</b>           |     |                                                                                                                                                        |                    |
| <i>Study design</i>      | 5   | Whether data collection was planned before the index test and reference standard were performed (prospective study) or after (retrospective study)     | Not applicable     |
| <i>Participants</i>      | 6   | Eligibility criteria                                                                                                                                   | Page 5             |
|                          | 7   | On what basis potentially eligible participants were identified (such as symptoms, results from previous tests, inclusion in registry)                 | Page 5             |
|                          | 8   | Where and when potentially eligible participants were identified (setting, location and dates)                                                         | Page 5             |
|                          | 9   | Whether participants formed a consecutive, random or convenience series                                                                                | Page 5             |
| <i>Test methods</i>      | 10a | Index test, in sufficient detail to allow replication                                                                                                  | Page 5, 6          |
|                          | 10b | Reference standard, in sufficient detail to allow replication                                                                                          | Page 5, 6          |
|                          | 11  | Rationale for choosing the reference standard (if alternatives exist)                                                                                  | Page 4, 5          |
|                          | 12a | Definition of and rationale for test positivity cut-offs or result categories of the index test, distinguishing pre-specified from exploratory         | Not applicable     |
|                          | 12b | Definition of and rationale for test positivity cut-offs or result categories of the reference standard, distinguishing pre-specified from exploratory | Page 4, 5          |
|                          | 13a | Whether clinical information and reference standard results were available to the performers/readers of the index test                                 | No                 |
|                          | 13b | Whether clinical information and index test results were available to the assessors of the reference standard                                          | Yes                |
| <i>Analysis</i>          | 14  | Methods for estimating or comparing measures of diagnostic accuracy                                                                                    | Not applicable     |
|                          | 15  | How indeterminate index test or reference standard results were handled                                                                                | Not applicable     |
|                          | 16  | How missing data on the index test and reference standard were handled                                                                                 | Page 9             |
|                          | 17  | Any analyses of variability in diagnostic accuracy, distinguishing pre-specified from exploratory                                                      | Page 6             |
|                          | 18  | Intended sample size and how it was determined                                                                                                         | Not applicable     |
| <b>RESULTS</b>           |     |                                                                                                                                                        |                    |
| <i>Participants</i>      | 19  | Flow of participants, using a diagram                                                                                                                  | Figure 1           |
|                          | 20  | Baseline demographic and clinical characteristics of participants                                                                                      | Page 8, Table 1    |
|                          | 21a | Distribution of severity of disease in those with the target condition                                                                                 | Page 8             |
|                          | 21b | Distribution of alternative diagnoses in those without the target condition                                                                            | Not applicable     |
|                          | 22  | Time interval and any clinical interventions between index test and reference standard                                                                 | Not applicable     |
| <i>Test results</i>      | 23  | Cross tabulation of the index test results (or their distribution) by the results of the reference standard                                            | Page 9             |
|                          | 24  | Estimates of diagnostic accuracy and their precision (such as 95% confidence intervals)                                                                | Page 8, 9, 10      |
|                          | 25  | Any adverse events from performing the index test or the reference standard                                                                            | Not applicable     |
| <b>DISCUSSION</b>        |     |                                                                                                                                                        |                    |
|                          | 26  | Study limitations, including sources of potential bias, statistical uncertainty, and generalisability                                                  | Page 12            |
|                          | 27  | Implications for practice, including the intended use and clinical role of the index test                                                              | Page 12            |
| <b>OTHER INFORMATION</b> |     |                                                                                                                                                        |                    |
|                          | 28  | Registration number and name of registry                                                                                                               | Page 16            |
|                          | 29  | Where the full study protocol can be accessed                                                                                                          | Page 16            |
|                          | 30  | Sources of funding and other support; role of funders                                                                                                  | Page 15            |



# STARD 2015

---

## AIM

STARD stands for “Standards for Reporting Diagnostic accuracy studies”. This list of items was developed to contribute to the completeness and transparency of reporting of diagnostic accuracy studies. Authors can use the list to write informative study reports. Editors and peer-reviewers can use it to evaluate whether the information has been included in manuscripts submitted for publication.

---

## EXPLANATION

A **diagnostic accuracy study** evaluates the ability of one or more medical tests to correctly classify study participants as having a **target condition**. This can be a disease, a disease stage, response or benefit from therapy, or an event or condition in the future. A medical test can be an imaging procedure, a laboratory test, elements from history and physical examination, a combination of these, or any other method for collecting information about the current health status of a patient.

The test whose accuracy is evaluated is called **index test**. A study can evaluate the accuracy of one or more index tests. Evaluating the ability of a medical test to correctly classify patients is typically done by comparing the distribution of the index test results with those of the **reference standard**. The reference standard is the best available method for establishing the presence or absence of the target condition. An accuracy study can rely on one or more reference standards.

If test results are categorized as either positive or negative, the cross tabulation of the index test results against those of the reference standard can be used to estimate the **sensitivity** of the index test (the proportion of participants *with* the target condition who have a positive index test), and its **specificity** (the proportion *without* the target condition who have a negative index test). From this cross tabulation (sometimes referred to as the contingency or “2x2” table), several other accuracy statistics can be estimated, such as the positive and negative **predictive values** of the test. Confidence intervals around estimates of accuracy can then be calculated to quantify the statistical **precision** of the measurements.

If the index test results can take more than two values, categorization of test results as positive or negative requires a **test positivity cut-off**. When multiple such cut-offs can be defined, authors can report a receiver operating characteristic (ROC) curve which graphically represents the combination of sensitivity and specificity for each possible test positivity cut-off. The **area under the ROC curve** informs in a single numerical value about the overall diagnostic accuracy of the index test.

The **intended use** of a medical test can be diagnosis, screening, staging, monitoring, surveillance, prediction or prognosis. The **clinical role** of a test explains its position relative to existing tests in the clinical pathway. A replacement test, for example, replaces an existing test. A triage test is used before an existing test; an add-on test is used after an existing test.

Besides diagnostic accuracy, several other outcomes and statistics may be relevant in the evaluation of medical tests. Medical tests can also be used to classify patients for purposes other than diagnosis, such as staging or prognosis. The STARD list was not explicitly developed for these other outcomes, statistics, and study types, although most STARD items would still apply.

---

## DEVELOPMENT

This STARD list was released in 2015. The 30 items were identified by an international expert group of methodologists, researchers, and editors. The guiding principle in the development of STARD was to select items that, when reported, would help readers to judge the potential for bias in the study, to appraise the applicability of the study findings and the validity of conclusions and recommendations. The list represents an update of the first version, which was published in 2003.

More information can be found on <http://www.equator-network.org/reporting-guidelines/stard>.



Supplement: bmjopen-2020-048482.draft_revisions.pdf [file bmjopen-2020-048482.draft_revisions.pdf]
